# Supplementary material for: Ectopically expressed glutaredoxin ROXY19 negatively regulates the detoxification pathway in Arabidopsis thaliana
Source: BMC Plant Biol. 2016 Sep 13;16(1):200. doi: 10.1186/s12870-016-0886-1 (PMC5022239; doi:10.1186/s12870-016-0886-1)
Supplement: Additional file 1: Table S1. — Microarray data of genes with higher expression levels (FC > 1.3, p < 0.05) in 35S:ROXY19 plants as compared to control plants. The table contains the gene identity (AGI), description, the mean expression values of four independent biological replicates of the genotypes Col-0, 35S:GRXC2, 35S:ROXY19 SSMS, 35S:ROXY19#8 and 35S:ROXY19#12, and the ratios (FC, fold changes, log2) of the transcript levels in the transgenic lines with respect to Col-0 and the corresponding p-values. (XLSX 163 kb) [file 12870_2016_886_MOESM1_ESM.xlsx]

## Sheet: 299 up in C8
Identifier	Description	Col	GRXC2	SSMS9	CCMC8	CCMC12	Col-CCMC8_logFC	Col-CCMC8_P.Value	Col-CCMC12_logFC	Col-CCMC12_P.Value	Col-GRXC2_logFC	Col-GRXC2_P.Value	Col-SSMS9_logFC	Col-SSMS9_P.Value
AT2G25510.1_at	unknown protein; Has 2 Blast hits to 2 proteins in 1 species: Archae - 0; Bacteria - 0; Metazoa - 0; Fungi - 0; Plants - 2; Viruses - 0; Other Eukaryotes - 0 (source: NCBI BLink). | chr2:10856399-10857156 FORWARD LENGTH=571	3.78244	4.53522	4.1043	5.84891	5.00185	-2.06647	5.64137e-05	-1.21941	0.00643256	-0.752778	0.0734456	-0.321861	0.427169
AT1G48600.1_at	PMEAMT, AtPMEAMT | S-adenosyl-L-methionine-dependent methyltransferases superfamily protein | chr1:17966383-17969354 FORWARD LENGTH=1770	3.16211	3.52714	3.72194	5.19496	3.58655	-2.03285	0.00738314	-0.424438	0.536952	-0.365023	0.594909	-0.559827	0.41725
AT5G22794.1_at	FUNCTIONS IN: molecular_function unknown; INVOLVED IN: biological_process unknown; LOCATED IN: cellular_component unknown; BEST Arabidopsis thaliana protein match is: Tetratricopeptide repeat (TPR)-like superfamily protein (TAIR:AT1G04770.1); Has 132 Blast hits to 132 proteins in 14 species: Archae - 0; Bacteria - 0; Metazoa - 0; Fungi - 0; Plants - 132; Viruses - 0; Other Eukaryotes - 0 (source:…	3.2451	3.921	4.49458	4.95977	3.28334	-1.71467	0.0473923	-0.0382403	0.962692	-0.675897	0.412784	-1.24947	0.138465
AT5G27030.1_at	TPR3 | TOPLESS-related 3 | chr5:9508718-9515396 REVERSE LENGTH=3655	1.73981	1.98877	2.35345	3.41815	2.43068	-1.67833	0.00429269	-0.690873	0.196025	-0.248953	0.634391	-0.613634	0.248506
AT5G42600.1_at	MRN1 | marneral synthase | chr5:17053517-17058245 FORWARD LENGTH=2605	4.37223	4.75978	4.21645	6.03082	6.58181	-1.65859	1.16749e-06	-2.20957	1.82344e-08	-0.387548	0.113515	0.155779	0.512329
AT5G23990.1_at	ATFRO5, FRO5 | ferric reduction oxidase 5 | chr5:8105565-8108590 REVERSE LENGTH=1974	5.47592	6.14984	5.4294	7.11553	7.15406	-1.63961	9.68211e-05	-1.67815	7.5104e-05	-0.67392	0.0560189	0.0465197	0.889505
AT1G08800.1_at	Protein of unknown function, DUF593 | chr1:2813061-2817639 REVERSE LENGTH=4026	2.09842	2.32771	1.98191	3.65902	2.54328	-1.56059	3.19779e-08	-0.444855	0.0178366	-0.229286	0.196045	0.116517	0.503795
AT1G19250.1_at	FMO1 | flavin-dependent monooxygenase 1 | chr1:6650529-6653078 REVERSE LENGTH=1745	3.69404	4.25407	4.15715	5.25188	4.83595	-1.55783	6.3737e-06	-1.14191	0.00022359	-0.560023	0.0371489	-0.463107	0.0792007
AT4G03610.1_at	Metallo-hydrolase/oxidoreductase superfamily protein | chr4:1605039-1606917 FORWARD LENGTH=912	2.38431	3.12955	3.22398	3.93228	3.39	-1.54797	0.0246307	-1.00569	0.128704	-0.745234	0.253441	-0.839669	0.20033
AT1G52100.1_at	Mannose-binding lectin superfamily protein | chr1:19383122-19385533 REVERSE LENGTH=1554	3.3304	3.03926	4.51119	4.81738	4.41341	-1.48698	0.0412786	-1.08301	0.126936	0.291138	0.672269	-1.18079	0.0980502
AT4G12545.1_at	Bifunctional inhibitor/lipid-transfer protein/seed storage 2S albumin superfamily protein | chr4:7434199-7434858 FORWARD LENGTH=660	5.11028	5.39269	5.49052	6.58219	6.39634	-1.47191	1.57765e-05	-1.28606	7.53946e-05	-0.28241	0.279074	-0.380243	0.150202
AT1G73010.1_at	ATPS2, PS2 | phosphate starvation-induced gene 2 | chr1:27464572-27466256 REVERSE LENGTH=1172	4.67177	4.41848	4.53905	6.11278	5.95096	-1.44101	8.17906e-06	-1.27918	3.45e-05	0.253297	0.295119	0.132722	0.579078
AT2G46880.2_at	ATPAP14, PAP14 | purple acid phosphatase 14 | chr2:19264694-19266446 REVERSE LENGTH=1528	4.31624	4.09193	4.21033	5.74852	5.18223	-1.43228	1.28331e-07	-0.865987	8.41421e-05	0.224309	0.208847	0.105907	0.546061
AT4G35920.1_at	MCA1 | PLAC8 family protein | chr4:17011788-17015256 REVERSE LENGTH=2003	4.76539	5.27958	5.71965	6.11919	5.65242	-1.3538	0.0114613	-0.88703	0.0818094	-0.514193	0.299553	-0.954263	0.0628144
AT1G21100.1_at	O-methyltransferase family protein | chr1:7386839-7388428 REVERSE LENGTH=1384	4.99395	5.58674	5.36319	6.34598	6.39085	-1.35203	4.94165e-05	-1.3969	3.3967e-05	-0.592791	0.0325901	-0.369241	0.166585
AT1G24147.1_at	unknown protein; FUNCTIONS IN: molecular_function unknown; INVOLVED IN: biological_process unknown; LOCATED IN: endomembrane system; BEST Arabidopsis thaliana protein match is: unknown protein (TAIR:AT1G24148.1); Has 4 Blast hits to 4 proteins in 2 species: Archae - 0; Bacteria - 0; Metazoa - 0; Fungi - 0; Plants - 4; Viruses - 0; Other Eukaryotes - 0 (source: NCBI BLink). | chr1:8542446-8543474 …	2.94993	3.13119	3.14556	4.29982	3.43759	-1.34989	5.28437e-09	-0.487654	0.00157799	-0.181255	0.184648	-0.195633	0.153809
AT4G31940.1_at	CYP82C4 | cytochrome P450, family 82, subfamily C, polypeptide 4 | chr4:15451988-15454160 FORWARD LENGTH=1821	2.24996	2.82953	2.49701	3.58422	3.45051	-1.33426	0.000353249	-1.20055	0.000941821	-0.579576	0.0730958	-0.247053	0.427946
AT5G17340.1_at	Putative membrane lipoprotein | chr5:5715624-5716268 REVERSE LENGTH=645	2.86095	2.93272	2.81528	4.19203	3.78175	-1.33108	0.000253681	-0.920801	0.00569816	-0.0717748	0.809839	0.0456706	0.878248
AT1G06830.1_at	Glutaredoxin family protein | chr1:2097151-2097655 FORWARD LENGTH=505	2.54006	2.82741	2.81982	3.86727	3.13739	-1.32721	4.72386e-07	-0.597326	0.00302199	-0.287341	0.117214	-0.279754	0.126553
AT4G33120.1_at	S-adenosyl-L-methionine-dependent methyltransferases superfamily protein | chr4:15975386-15978111 REVERSE LENGTH=1315	3.40557	3.73682	3.71745	4.71861	5.59289	-1.31305	2.34321e-05	-2.18732	2.16678e-08	-0.331252	0.172678	-0.311888	0.197875
AT5G06640.1_at	Proline-rich extensin-like family protein | chr5:2039859-2041928 REVERSE LENGTH=2070	5.07342	5.75465	4.86473	6.37022	6.11025	-1.29681	0.018017	-1.03684	0.0521046	-0.681231	0.188755	0.208692	0.680628
AT3G12900.1_at	2-oxoglutarate (2OG) and Fe(II)-dependent oxygenase superfamily protein | chr3:4104576-4106112 FORWARD LENGTH=1074	6.80498	6.7126	6.55042	8.0814	7.3838	-1.27642	0.000965998	-0.578825	0.0915008	0.0923811	0.779353	0.25456	0.443389
AT2G01880.1_at	PAP7, ATPAP7 | purple acid phosphatase 7 | chr2:391423-394032 REVERSE LENGTH=1192	4.68349	5.09494	5.05411	5.95805	6.13371	-1.27456	6.37684e-06	-1.45022	1.16437e-06	-0.411445	0.0584475	-0.370621	0.085434
AT1G61750.1_at	Receptor-like protein kinase-related family protein | chr1:22804613-22806318 REVERSE LENGTH=1026	4.62747	4.65148	4.70355	5.89586	6.77692	-1.26839	1.02641e-07	-2.14946	2.37231e-11	-0.0240183	0.874675	-0.0760795	0.618461
AT1G23110.5_at	unknown protein; FUNCTIONS IN: molecular_function unknown; LOCATED IN: chloroplast; BEST Arabidopsis thaliana protein match is: unknown protein (TAIR:AT1G70900.1). | chr1:8196554-8198331 REVERSE LENGTH=1144	5.37273	4.58813	5.28085	6.63655	6.23449	-1.26382	3.92917e-05	-0.861759	0.00172262	0.784605	0.00358513	0.0918862	0.700064
AT3G44860.1_at	FAMT | farnesoic acid carboxyl-O-methyltransferase | chr3:16379633-16381070 FORWARD LENGTH=1234	3.59937	3.9225	3.86847	4.85897	4.40551	-1.2596	0.00229784	-0.806137	0.0358234	-0.323128	0.375464	-0.269104	0.458946
AT1G73325.1_at	Kunitz family trypsin and protease inhibitor protein | chr1:27567518-27568186 REVERSE LENGTH=669	3.64964	3.52202	3.68519	4.88491	4.16419	-1.23527	0.0014893	-0.514551	0.136911	0.127622	0.704016	-0.0355482	0.915568
AT5G47455.6_at	unknown protein; FUNCTIONS IN: molecular_function unknown; INVOLVED IN: biological_process unknown; LOCATED IN: chloroplast; EXPRESSED IN: 13 plant structures; EXPRESSED DURING: 8 growth stages; BEST Arabidopsis thaliana protein match is: unknown protein (TAIR:AT4G17310.1); Has 35333 Blast hits to 34131 proteins in 2444 species: Archae - 798; Bacteria - 22429; Metazoa - 974; Fungi - 991; Plants -…	3.00381	2.59468	2.30921	4.23117	3.06157	-1.22736	0.0403546	-0.057765	0.918395	0.409128	0.471229	0.694595	0.227418
AT1G66100.1_at	Plant thionin | chr1:24605671-24606537 REVERSE LENGTH=674	6.24547	5.69826	6.27268	7.46388	6.6983	-1.2184	0.010319	-0.452821	0.301692	0.547216	0.215051	-0.0272053	0.949775
AT1G26250.1_at	Proline-rich extensin-like family protein | chr1:9083838-9085464 FORWARD LENGTH=1627	5.32494	4.44985	5.60153	6.5275	5.73548	-1.20256	0.00178573	-0.41054	0.227994	0.875091	0.0158674	-0.276582	0.411531
AT5G33355.1_at	Defensin-like (DEFL) family protein | chr5:12599253-12599671 FORWARD LENGTH=309	4.09694	4.07587	4.22705	5.28335	4.67188	-1.18641	0.00663424	-0.57494	0.154821	0.0210619	0.957227	-0.130114	0.740769
AT3G48090.1_at	EDS1, ATEDS1 | alpha/beta-Hydrolases superfamily protein | chr3:17755374-17757780 REVERSE LENGTH=2139	3.68556	3.55	4.34622	4.85197	4.67708	-1.16641	0.0154989	-0.99152	0.0355812	0.135559	0.759821	-0.660665	0.147567
AT5G42580.1_at	CYP705A12 | cytochrome P450, family 705, subfamily A, polypeptide 12 | chr5:17023646-17025229 REVERSE LENGTH=1500	4.87898	5.44418	5.11235	6.03168	6.43435	-1.1527	0.000239737	-1.55537	7.9886e-06	-0.565203	0.0383542	-0.233373	0.368642
AT3G09922.1_at	IPS1, ATIPS1 | induced by phosphate starvation1 | chr3:3050989-3051530 FORWARD LENGTH=542	3.50848	3.41838	3.5712	4.66037	4.27319	-1.15188	0.000409161	-0.764707	0.0102488	0.0901058	0.739687	-0.0627218	0.816947
AT5G55610.1_at	unknown protein; LOCATED IN: mitochondrion, chloroplast, plastid, membrane; EXPRESSED IN: 25 plant structures; EXPRESSED DURING: 13 growth stages; Has 1807 Blast hits to 1807 proteins in 277 species: Archae - 0; Bacteria - 0; Metazoa - 736; Fungi - 347; Plants - 385; Viruses - 0; Other Eukaryotes - 339 (source: NCBI BLink). | chr5:22525807-22528110 FORWARD LENGTH=1416	2.09565	2.21356	2.21767	3.24588	2.92644	-1.15023	0.0136563	-0.830795	0.0640387	-0.117914	0.782758	-0.122023	0.775404
AT1G65390.2_at	ATPP2-A5, PP2-A5 | phloem protein 2 A5 | chr1:24292490-24294612 FORWARD LENGTH=1350	3.844	3.75166	3.87402	4.98034	4.632	-1.13634	6.89653e-08	-0.787996	1.03555e-05	0.0923461	0.489593	-0.0300182	0.821235
AT5G45820.1_at	CIPK20, SnRK3.6, PKS18 | CBL-interacting protein kinase 20 | chr5:18586980-18588543 REVERSE LENGTH=1564	3.95768	4.03892	3.97368	5.09357	4.70083	-1.13589	0.0232201	-0.743146	0.122149	-0.0812377	0.861284	-0.0159962	0.972541
AT3G54500.3_at	FUNCTIONS IN: molecular_function unknown; INVOLVED IN: biological_process unknown; LOCATED IN: cellular_component unknown; EXPRESSED IN: 22 plant structures; EXPRESSED DURING: 13 growth stages; BEST Arabidopsis thaliana protein match is: dentin sialophosphoprotein-related (TAIR:AT5G64170.1). | chr3:20175370-20179027 REVERSE LENGTH=2639	3.93935	4.4593	4.34141	5.06691	4.54067	-1.12756	0.0332397	-0.601317	0.234911	-0.51995	0.30201	-0.402055	0.42205
AT5G24420.1_at	PGL5 | 6-phosphogluconolactonase 5 | chr5:8336614-8338008 REVERSE LENGTH=1217	5.37561	5.25105	5.39641	6.48768	5.77019	-1.11208	0.000100816	-0.394584	0.0960124	0.124563	0.586233	-0.020799	0.92729
AT2G37840.1_at	Protein kinase superfamily protein | chr2:15851803-15856301 FORWARD LENGTH=2631	3.59583	3.01124	4.53514	4.70617	3.68433	-1.11033	0.0471168	-0.0884948	0.867106	0.584595	0.276802	-0.939302	0.0882279
AT1G45015.2_at	MD-2-related lipid recognition domain-containing protein | chr1:17021684-17022781 FORWARD LENGTH=616	3.46629	3.29671	3.73643	4.57617	5.25199	-1.10988	0.000211768	-1.7857	6.60233e-07	0.169582	0.490154	-0.270143	0.276463
AT2G15370.1_at	FUT5, ATFUT5 | fucosyltransferase 5 | chr2:6698100-6699783 REVERSE LENGTH=1602	4.68591	4.6779	4.9726	5.78932	5.8368	-1.10341	2.0807e-06	-1.15089	1.17947e-06	0.00801358	0.961054	-0.286689	0.0932781
AT3G19430.1_at	late embryogenesis abundant protein-related / LEA protein-related | chr3:6736184-6738330 REVERSE LENGTH=1878	4.77343	4.85761	5.05544	5.86979	5.76497	-1.09637	5.67443e-05	-0.991544	0.000168292	-0.0841869	0.69366	-0.282011	0.19653
AT3G49260.2_at	iqd21 | IQ-domain 21 | chr3:18262511-18265980 FORWARD LENGTH=1781	2.80052	3.47594	2.58965	3.89235	4.32756	-1.09183	0.033774	-1.52705	0.00479253	-0.675424	0.172456	0.21087	0.662712
AT4G14400.3_at	ACD6 | ankyrin repeat family protein | chr4:8294452-8298602 FORWARD LENGTH=2335	6.58271	7.4104	6.77024	7.65528	7.08012	-1.07256	0.0218205	-0.497406	0.259819	-0.827681	0.0686359	-0.18753	0.666185
AT5G27860.1_at	unknown protein; FUNCTIONS IN: molecular_function unknown; INVOLVED IN: biological_process unknown; LOCATED IN: chloroplast; EXPRESSED IN: pollen tube; Has 35333 Blast hits to 34131 proteins in 2444 species: Archae - 798; Bacteria - 22429; Metazoa - 974; Fungi - 991; Plants - 531; Viruses - 0; Other Eukaryotes - 9610 (source: NCBI BLink). | chr5:9874824-9876464 REVERSE LENGTH=800	3.2989	3.82478	3.40067	4.36809	4.09834	-1.06918	0.0485175	-0.799434	0.131086	-0.525876	0.311944	-0.101771	0.842718
AT5G23830.2_at	MD-2-related lipid recognition domain-containing protein | chr5:8033738-8034930 FORWARD LENGTH=768	6.80621	7.35884	7.05168	7.86721	7.87806	-1.061	4.10449e-07	-1.07185	3.55406e-07	-0.552629	0.000830624	-0.24547	0.0926084
AT5G07790.1_at	unknown protein; BEST Arabidopsis thaliana protein match is: unknown protein (TAIR:AT5G61300.1); Has 1807 Blast hits to 1807 proteins in 277 species: Archae - 0; Bacteria - 0; Metazoa - 736; Fungi - 347; Plants - 385; Viruses - 0; Other Eukaryotes - 339 (source: NCBI BLink). | chr5:2483311-2486361 FORWARD LENGTH=2453	3.41373	4.08096	4.26659	4.47144	4.53146	-1.05771	0.0249812	-1.11773	0.0187037	-0.667229	0.140514	-0.852854	0.0642754
AT5G20790.1_at	unknown protein; FUNCTIONS IN: molecular_function unknown; INVOLVED IN: biological_process unknown; LOCATED IN: endomembrane system; EXPRESSED IN: 11 plant structures; EXPRESSED DURING: LP.04 four leaves visible, 4 anthesis, petal differentiation and expansion stage; BEST Arabidopsis thaliana protein match is: unknown protein (TAIR:AT3G43110.1); Has 30201 Blast hits to 17322 proteins in 780 speci…	3.26339	3.08969	3.61087	4.31845	4.05263	-1.05506	0.000254828	-0.789242	0.0032528	0.173704	0.465693	-0.347476	0.153191
AT1G01910.4_at	P-loop containing nucleoside triphosphate hydrolases superfamily protein | chr1:313101-315902 REVERSE LENGTH=1513	2.99874	3.02547	2.97243	4.04741	3.0917	-1.04867	0.00280837	-0.0929636	0.763087	-0.0267324	0.930846	0.026307	0.931944
AT3G60260.3_at	ELMO/CED-12 family protein | chr3:22274505-22277148 FORWARD LENGTH=1184	2.65526	3.28534	3.42541	3.70182	3.42868	-1.04656	0.0492147	-0.773411	0.136615	-0.630078	0.220537	-0.770147	0.138179
AT4G02890.3_at	UBQ14 | Ubiquitin family protein | chr4:1278530-1280028 REVERSE LENGTH=1499	4.79908	5.4194	5.39463	5.84215	5.23564	-1.04307	0.00769311	-0.436562	0.225826	-0.620317	0.0915469	-0.595545	0.104216
AT1G76930.2_at	ATEXT4, ORG5, ATEXT1, EXT1, EXT4 | extensin 4 | chr1:28895301-28896883 REVERSE LENGTH=1106	7.56689	7.8421	7.89266	8.60867	9.28686	-1.04177	1.04573e-05	-1.71996	8.95007e-09	-0.27521	0.129391	-0.325766	0.0761651
AT5G64200.1_at	ATSC35, SC35, At-SC35 | ortholog of human splicing factor SC35 | chr5:25681202-25683641 REVERSE LENGTH=1457	2.93639	3.60262	3.28816	3.97101	3.18773	-1.03462	0.0483389	-0.25134	0.613343	-0.666235	0.189556	-0.35177	0.480925
AT2G16005.1_at	MD-2-related lipid recognition domain-containing protein | chr2:6959150-6960197 REVERSE LENGTH=742	7.18529	7.77234	7.34034	8.209	8.31435	-1.02371	0.000191065	-1.12906	6.69752e-05	-0.587053	0.0155091	-0.155049	0.489613
AT3G06435.1_at	Expressed protein | chr3:1969121-1970784 REVERSE LENGTH=1664	4.1926	4.54373	4.65106	5.20628	5.18839	-1.01368	0.000217699	-0.995798	0.000260545	-0.351134	0.12851	-0.45846	0.0520093
AT5G19110.1_at	Eukaryotic aspartyl protease family protein | chr5:6411561-6413170 REVERSE LENGTH=1377	4.6721	5.01955	4.78094	5.67997	5.23888	-1.00787	0.0220353	-0.566778	0.17606	-0.347444	0.399389	-0.10884	0.789949
AT3G01175.1_at	Protein of unknown function (DUF1666) | chr3:59471-60845 FORWARD LENGTH=1219	4.86472	4.94689	5.21717	5.86308	6.08582	-0.99836	0.000592832	-1.2211	7.67968e-05	-0.0821732	0.736766	-0.352454	0.160246
AT1G68250.1_at	unknown protein; Has 5 Blast hits to 5 proteins in 2 species: Archae - 0; Bacteria - 0; Metazoa - 0; Fungi - 0; Plants - 5; Viruses - 0; Other Eukaryotes - 0 (source: NCBI BLink). | chr1:25579373-25580194 REVERSE LENGTH=822	2.93227	3.35548	2.79297	3.92919	2.95699	-0.996915	0.00904116	-0.0247191	0.943048	-0.42321	0.230687	0.139308	0.687887
AT1G23110.3_at	unknown protein; FUNCTIONS IN: molecular_function unknown; LOCATED IN: chloroplast; BEST Arabidopsis thaliana protein match is: unknown protein (TAIR:AT1G70900.1); Has 30201 Blast hits to 17322 proteins in 780 species: Archae - 12; Bacteria - 1396; Metazoa - 17338; Fungi - 3422; Plants - 5037; Viruses - 0; Other Eukaryotes - 2996 (source: NCBI BLink). | chr1:8196608-8197921 REVERSE LENGTH=903	3.13618	2.7089	2.5775	4.13303	3.05982	-0.996853	0.0279147	0.0763525	0.856832	0.427277	0.319248	0.558675	0.197078
AT1G27020.1_at	unknown protein; BEST Arabidopsis thaliana protein match is: unknown protein (TAIR:AT1G27030.1); Has 514 Blast hits to 514 proteins in 175 species: Archae - 0; Bacteria - 311; Metazoa - 0; Fungi - 0; Plants - 65; Viruses - 0; Other Eukaryotes - 138 (source: NCBI BLink). | chr1:9378559-9380692 FORWARD LENGTH=1276	5.53563	5.89133	5.76325	6.52732	6.91746	-0.991688	5.3451e-05	-1.38183	8.20236e-07	-0.355695	0.0763015	-0.227619	0.244522
AT3G32920.1_at	P-loop containing nucleoside triphosphate hydrolases superfamily protein | chr3:13485399-13488783 REVERSE LENGTH=857	1.69025	2.18711	1.88866	2.67334	2.29231	-0.983093	0.0309365	-0.602065	0.168987	-0.496862	0.252385	-0.198411	0.64251
AT1G54360.2_at	TAF6B | TBP-ASSOCIATED FACTOR 6B | chr1:20290572-20293266 FORWARD LENGTH=1718	2.97469	3.30706	2.63078	3.95751	3.21427	-0.982816	0.00420835	-0.239583	0.435701	-0.332367	0.28325	0.343909	0.267399
AT2G40270.1_at	Protein kinase family protein | chr2:16821934-16824506 REVERSE LENGTH=1851	5.16247	5.84846	5.49227	6.1404	5.81695	-0.977928	0.0088295	-0.654484	0.0651962	-0.685988	0.054329	-0.329799	0.335712
AT4G25090.1_at	Riboflavin synthase-like superfamily protein | chr4:12878775-12883599 REVERSE LENGTH=2705	6.8796	7.21269	7.24408	7.85587	7.43033	-0.976267	0.00665365	-0.550728	0.101065	-0.333093	0.309868	-0.364479	0.267824
AT3G17330.1_at	ECT6 | evolutionarily conserved C-terminal region 6 | chr3:5916940-5920188 REVERSE LENGTH=2405	7.06214	7.22097	7.47032	8.03749	7.60797	-0.975351	9.24136e-05	-0.545827	0.0119804	-0.158833	0.427212	-0.408182	0.0512056
AT4G01680.2_at	MYB55 | myb domain protein 55 | chr4:716021-717415 REVERSE LENGTH=1248	4.2905	4.34671	4.39349	5.26283	4.80254	-0.972332	0.0162684	-0.512038	0.180038	-0.0562038	0.880054	-0.10299	0.782311
AT5G58970.1_at	ATUCP2, UCP2 | uncoupling protein 2 | chr5:23808461-23811258 REVERSE LENGTH=1339	3.5191	3.53325	4.29635	4.49141	3.00623	-0.972314	0.0276477	0.512867	0.222661	-0.0141542	0.972582	-0.777251	0.0715414
AT2G29220.1_at	Concanavalin A-like lectin protein kinase family protein | chr2:12562781-12564664 REVERSE LENGTH=1884	3.46092	3.85364	3.82808	4.43314	4.16518	-0.972219	0.000153921	-0.704265	0.00285767	-0.39272	0.0706122	-0.367165	0.0892023
AT5G62360.1_at	Plant invertase/pectin methylesterase inhibitor superfamily protein | chr5:25040649-25041462 FORWARD LENGTH=814	4.31019	3.96749	4.52578	5.28183	4.95964	-0.97164	0.020243	-0.649449	0.106092	0.3427	0.381316	-0.215593	0.579344
AT4G21830.1_at	ATMSRB7, MSRB7 | methionine sulfoxide reductase B7 | chr4:11584346-11585419 REVERSE LENGTH=817	6.76033	7.05508	7.02871	7.7308	7.60932	-0.970464	4.62172e-05	-0.848987	0.000196692	-0.294751	0.124177	-0.268381	0.159243
AT1G08125.2_at	S-adenosyl-L-methionine-dependent methyltransferases superfamily protein | chr1:2539614-2542334 REVERSE LENGTH=1305	4.07686	4.46011	4.56578	5.04535	5.31667	-0.968481	0.0498532	-1.23981	0.0148887	-0.383246	0.416578	-0.48892	0.302781
AT1G04300.2_at	TRAF-like superfamily protein | chr1:1148659-1154652 REVERSE LENGTH=3783	4.77511	5.26108	5.09356	5.74272	5.81444	-0.967616	0.0073716	-1.03933	0.00450985	-0.485974	0.147145	-0.318451	0.334094
AT2G11810.2_at	MGDC, MGD3, ATMGD3 | monogalactosyldiacylglycerol synthase type C | chr2:4743322-4746734 FORWARD LENGTH=1591	4.78888	4.69695	4.60496	5.74941	5.32843	-0.960528	2.58822e-05	-0.539551	0.00567697	0.0919371	0.599788	0.183924	0.299333
AT5G20790.2_at	unknown protein; FUNCTIONS IN: molecular_function unknown; INVOLVED IN: biological_process unknown; LOCATED IN: endomembrane system; EXPRESSED IN: 11 plant structures; EXPRESSED DURING: LP.04 four leaves visible, 4 anthesis, petal differentiation and expansion stage; BEST Arabidopsis thaliana protein match is: unknown protein (TAIR:AT3G43110.1). | chr5:7039911-7040654 REVERSE LENGTH=500	4.70646	4.42608	4.7655	5.66696	5.35456	-0.960502	0.00854186	-0.648104	0.0619774	0.280378	0.40079	-0.0590371	0.858247
AT5G26280.2_at	TRAF-like family protein | chr5:9208711-9210572 FORWARD LENGTH=1166	8.50128	8.62011	8.65871	9.46097	9.58013	-0.959688	8.78756e-06	-1.07885	1.93182e-06	-0.118832	0.45989	-0.157431	0.330287
AT4G20320.1_at	CTP synthase family protein | chr4:10974579-10979464 FORWARD LENGTH=2347	3.90876	4.38055	4.30048	4.86757	4.06208	-0.958811	0.0345918	-0.153316	0.719168	-0.471789	0.275692	-0.391717	0.362988
AT1G45015.1_at	MD-2-related lipid recognition domain-containing protein | chr1:17021610-17022781 FORWARD LENGTH=656	4.63317	4.41732	4.4321	5.58948	6.21144	-0.956304	0.00402887	-1.57827	3.56496e-05	0.215856	0.467284	0.201073	0.497911
AT1G07960.2_at	ATPDIL5-1, PDIL5-1 | PDI-like 5-1 | chr1:2467189-2469139 FORWARD LENGTH=1241	3.71131	4.0548	3.58479	4.66678	3.48304	-0.955474	0.0139981	0.228268	0.524197	-0.343486	0.341293	0.126519	0.723043
AT3G54580.1_at	Proline-rich extensin-like family protein | chr3:20200688-20203782 REVERSE LENGTH=3095	4.65676	5.05001	4.54612	5.60902	5.29342	-0.952257	0.00248706	-0.636652	0.0306061	-0.393246	0.164644	0.110649	0.688462
AT5G60660.1_at	PIP2F, PIP2;4 | plasma membrane intrinsic protein 2;4 | chr5:24375457-24376989 REVERSE LENGTH=1142	6.77407	6.84462	6.7042	7.72082	7.7388	-0.946747	3.36997e-06	-0.964724	2.6323e-06	-0.0705499	0.630164	0.0698704	0.633442
AT5G63850.1_at	AAP4 | amino acid permease 4 | chr5:25551055-25553520 FORWARD LENGTH=1847	6.011	6.4614	6.19476	6.95439	6.68847	-0.943395	0.000106044	-0.677473	0.00232657	-0.450401	0.0301877	-0.18376	0.350059
AT1G21110.1_at	O-methyltransferase family protein | chr1:7389981-7391553 REVERSE LENGTH=1385	2.35372	2.30457	2.45673	3.29446	2.70507	-0.940739	0.00506572	-0.351355	0.249401	0.0491463	0.869654	-0.103016	0.731203
AT4G13800.1_at	Protein of unknown function (DUF803) | chr4:8001862-8004139 REVERSE LENGTH=1559	4.48366	4.68324	4.66045	5.42149	4.98546	-0.937828	0.00255188	-0.501793	0.0776764	-0.199571	0.466571	-0.176788	0.518291
AT4G19690.2_at	IRT1 | iron-regulated transporter 1 | chr4:10707446-10709015 FORWARD LENGTH=1377	7.51779	7.51779	7.19773	8.45508	8.24426	-0.937295	0.00531024	-0.726475	0.0244829	-9.57645e-08	1	0.320055	0.29402
AT5G66600.1_at	Protein of unknown function, DUF547 | chr5:26575000-26578826 REVERSE LENGTH=2461	2.89951	3.01846	3.40012	3.8341	3.23111	-0.934581	0.01521	-0.331601	0.354249	-0.118948	0.737011	-0.50061	0.168208
AT1G53940.1_at	GLIP2 | GDSL-motif lipase 2 | chr1:20143279-20145780 FORWARD LENGTH=1311	4.84569	4.96233	5.20279	5.77912	5.63161	-0.933434	0.00485971	-0.785923	0.0146104	-0.116641	0.693498	-0.357105	0.235836
AT3G28220.1_at	TRAF-like family protein | chr3:10524404-10526728 FORWARD LENGTH=1360	8.20792	8.56281	7.91698	9.13449	8.36192	-0.926567	0.0313784	-0.153996	0.702832	-0.354888	0.38343	0.290934	0.473368
AT1G02900.1_at	RALFL1, RALF1, ATRALF1 | rapid alkalinization factor 1 | chr1:653765-654343 REVERSE LENGTH=579	5.73612	5.94395	6.03212	6.66026	6.77669	-0.924133	0.000323261	-1.04056	9.47593e-05	-0.207828	0.333371	-0.295995	0.173851
AT3G23190.1_at	HR-like lesion-inducing protein-related | chr3:8279289-8280912 FORWARD LENGTH=1056	4.76947	4.75095	4.84526	5.69241	5.54198	-0.92294	6.23492e-07	-0.772518	6.6621e-06	0.0185126	0.882902	-0.0757942	0.54839
AT3G01260.1_at	Galactose mutarotase-like superfamily protein | chr3:80176-82005 REVERSE LENGTH=1349	3.72537	4.02626	4.01546	4.64431	4.38502	-0.918934	3.88628e-05	-0.659645	0.00110739	-0.300888	0.0944608	-0.290089	0.105972
AT5G03545.1_at	AT4, ATIPS2 | Expressed in response to phosphate starvation, this response is enhanced by the presence of IAA. | chr5:894706-895400 FORWARD LENGTH=695	5.58546	5.13266	5.40489	6.50374	6.18838	-0.918285	7.76177e-06	-0.602929	0.000747356	0.452798	0.00703015	0.180565	0.241413
AT1G35710.1_at	Protein kinase family protein with leucine-rich repeat domain | chr1:13220940-13224681 FORWARD LENGTH=3658	4.05227	4.33339	4.22274	4.96368	4.33941	-0.911416	0.00299047	-0.287146	0.29486	-0.281125	0.304799	-0.17047	0.529943
AT1G21910.1_at	DREB26 | Integrase-type DNA-binding superfamily protein | chr1:7696536-7697699 FORWARD LENGTH=1164	5.61076	5.71639	5.93026	6.51934	6.44513	-0.908581	0.000773321	-0.834363	0.00161586	-0.105627	0.645134	-0.319501	0.173516
AT4G37080.1_at	Protein of unknown function, DUF547 | chr4:17474166-17476952 FORWARD LENGTH=2069	4.98878	4.91118	4.63557	5.89714	4.84965	-0.90836	0.0449585	0.139136	0.745319	0.0775984	0.8561	0.353211	0.413325
AT2G23600.1_at	ACL, ATMES2, MES2, ATME8, ME8 | acetone-cyanohydrin lyase | chr2:10042199-10043673 REVERSE LENGTH=950	3.52935	3.71087	4.0579	4.42547	4.20202	-0.896127	1.18472e-06	-0.672679	4.35072e-05	-0.18152	0.166912	-0.528558	0.000535636
AT2G15130.1_at	Plant basic secretory protein (BSP) family protein | chr2:6564945-6566004 FORWARD LENGTH=1060	1.81362	2.00083	2.0508	2.70764	2.24585	-0.894011	0.0134381	-0.432223	0.202087	-0.187207	0.573527	-0.237178	0.476953
AT2G33790.1_at	ATAGP30, AGP30 | arabinogalactan protein 30 | chr2:14293561-14295271 REVERSE LENGTH=1055	7.2497	7.16524	7.22538	8.13568	8.03857	-0.885975	6.56822e-06	-0.788869	2.71752e-05	0.0844649	0.559225	0.0243219	0.865873
AT2G43920.2_at	HOL2, ATHOL2 | S-adenosyl-L-methionine-dependent methyltransferases superfamily protein | chr2:18189008-18191348 REVERSE LENGTH=1099	2.89474	3.22744	2.92915	3.77933	3.40894	-0.884592	0.000247466	-0.514198	0.0165812	-0.332694	0.104786	-0.0344111	0.861791
AT2G46830.1_at	CCA1 | circadian clock associated 1 | chr2:19245672-19248909 FORWARD LENGTH=2268	3.78314	3.64287	3.78097	4.66759	4.16742	-0.884452	0.0104302	-0.384277	0.230534	0.140272	0.656026	0.00217537	0.994473
AT1G21120.1_at	O-methyltransferase family protein | chr1:7395228-7396773 REVERSE LENGTH=1358	4.31234	3.88792	4.17466	5.19521	5.2284	-0.882873	0.00186597	-0.916063	0.0013743	0.424425	0.0974225	0.13768	0.577754
AT1G54000.1_at	GDSL-like Lipase/Acylhydrolase superfamily protein | chr1:20154169-20156419 REVERSE LENGTH=1609	7.9368	8.16663	8.24737	8.8183	8.46477	-0.881509	2.89109e-06	-0.527979	0.000856183	-0.229832	0.099876	-0.310574	0.0306926
AT3G25240.1_at	Protein of unknown function (DUF506) chr3:9192540-9193385 FORWARD LENGTH=846	3.94011	3.96427	4.08027	4.81977	4.59355	-0.879662	2.28451e-05	-0.65344	0.000540414	-0.0241594	0.87864	-0.140161	0.380708
AT1G14250.1_at	GDA1/CD39 nucleoside phosphatase family protein | chr1:4868452-4871488 FORWARD LENGTH=1846	6.56514	6.52019	6.36398	7.44476	6.89419	-0.879617	0.00277624	-0.329055	0.212124	0.0449493	0.861736	0.201159	0.43939
AT1G21250.1_at	WAK1, PRO25 | cell wall-associated kinase | chr1:7439266-7442113 FORWARD LENGTH=2675	3.72524	3.96587	4.12214	4.60095	4.49451	-0.875713	0.0130979	-0.769272	0.026456	-0.240632	0.459637	-0.396907	0.228531
AT3G22235.1_at	BEST Arabidopsis thaliana protein match is: pathogen and circadian controlled 1 (TAIR:AT3G22231.1); Has 122 Blast hits to 122 proteins in 11 species: Archae - 0; Bacteria - 0; Metazoa - 0; Fungi - 0; Plants - 122; Viruses - 0; Other Eukaryotes - 0 (source: NCBI BLink). | chr3:7854419-7855791 REVERSE LENGTH=670	3.97422	4.52673	3.88016	4.84694	3.65484	-0.872716	0.0285655	0.319381	0.395524	-0.552505	0.149382	0.0940662	0.800597
AT3G14810.1_at	MSL5 | mechanosensitive channel of small conductance-like 5 | chr3:4971223-4974354 REVERSE LENGTH=2784	6.25814	6.71392	6.85022	7.1291	6.92108	-0.870965	0.00899196	-0.662942	0.0389232	-0.455782	0.143211	-0.59208	0.0621206
AT1G19960.1_at	BEST Arabidopsis thaliana protein match is: transmembrane receptors (TAIR:AT2G32140.1); Has 41 Blast hits to 41 proteins in 17 species: Archae - 0; Bacteria - 2; Metazoa - 23; Fungi - 0; Plants - 11; Viruses - 0; Other Eukaryotes - 5 (source: NCBI BLink). | chr1:6928039-6928463 FORWARD LENGTH=425	5.59634	6.17247	5.6798	6.46571	6.06617	-0.869367	0.000957115	-0.469824	0.0474858	-0.576124	0.0177497	-0.0834508	0.71015
AT5G04830.1_at	Nuclear transport factor 2 (NTF2) family protein | chr5:1402045-1403845 REVERSE LENGTH=960	4.68178	4.84159	5.23875	5.54869	5.08654	-0.866907	0.00580269	-0.404762	0.161704	-0.159809	0.571735	-0.556967	0.0598175
AT1G13750.1_at	Purple acid phosphatases superfamily protein | chr1:4715394-4718235 REVERSE LENGTH=2082	5.36	5.20185	5.3557	6.22637	6.04638	-0.866373	4.41757e-06	-0.686377	7.23899e-05	0.158147	0.255159	0.00429854	0.974871
AT4G37160.1_at	sks15 | SKU5 similar 15 | chr4:17494705-17497124 REVERSE LENGTH=1741	6.20144	5.95676	6.15534	7.06215	6.97121	-0.860708	0.00368452	-0.769774	0.0079931	0.244679	0.356279	0.0460952	0.860445
AT2G23010.2_at	SCPL9 | serine carboxypeptidase-like 9 | chr2:9798843-9802674 FORWARD LENGTH=1503	5.01891	5.56133	4.96031	5.87286	5.23836	-0.85395	0.00103597	-0.219444	0.329672	-0.542414	0.0233378	0.0586069	0.792097
AT3G55760.2_at	unknown protein; LOCATED IN: chloroplast; EXPRESSED IN: 16 plant structures; EXPRESSED DURING: 10 growth stages; BEST Arabidopsis thaliana protein match is: unknown protein (TAIR:AT1G42430.2); Has 176 Blast hits to 125 proteins in 40 species: Archae - 0; Bacteria - 3; Metazoa - 19; Fungi - 9; Plants - 81; Viruses - 0; Other Eukaryotes - 64 (source: NCBI BLink). | chr3:20700435-20703056 FORWARD LE…	2.09506	2.31411	2.20606	2.94799	2.11091	-0.852925	0.0102	-0.0158428	0.958132	-0.219041	0.471171	-0.110993	0.713534
AT5G62420.1_at	NAD(P)-linked oxidoreductase superfamily protein | chr5:25064835-25066111 FORWARD LENGTH=951	3.9596	4.02189	4.09152	4.81107	5.05603	-0.85147	5.81776e-05	-1.09642	2.63502e-06	-0.0622836	0.708052	-0.131912	0.430839
AT5G54370.1_at	Late embryogenesis abundant (LEA) protein-related | chr5:22075283-22076777 FORWARD LENGTH=1275	7.06776	6.88985	7.03308	7.91649	7.90484	-0.848731	0.000111831	-0.837084	0.000129582	0.177912	0.317834	0.0346822	0.843528
AT5G43520.1_at	Cysteine/Histidine-rich C1 domain family protein | chr5:17485439-17486191 REVERSE LENGTH=753	5.60007	5.6219	5.98999	6.44125	6.81685	-0.841184	0.00318249	-1.21679	0.000108956	-0.0218314	0.93074	-0.389926	0.132714
AT2G23000.1_at	scpl10 | serine carboxypeptidase-like 10 | chr2:9792212-9795863 FORWARD LENGTH=1508	3.77057	4.36361	3.98627	4.61024	4.15855	-0.839665	0.00651932	-0.387973	0.172797	-0.593038	0.0435617	-0.215694	0.440333
AT1G35625.1_at	RING/U-box superfamily protein | chr1:13158466-13160245 REVERSE LENGTH=974	2.60864	2.7302	2.69719	3.44719	3.81751	-0.838557	0.00371225	-1.20887	0.000140678	-0.121569	0.635404	-0.0885527	0.729433
AT1G66800.1_at	NAD(P)-binding Rossmann-fold superfamily protein | chr1:24924813-24926365 FORWARD LENGTH=1128	2.53441	3.06881	2.98849	3.36338	3.26701	-0.82897	0.000615829	-0.732605	0.00180423	-0.5344	0.0157642	-0.454088	0.03614
AT1G14240.4_at	GDA1/CD39 nucleoside phosphatase family protein | chr1:4865121-4867997 FORWARD LENGTH=1710	3.711	4.27238	3.80573	4.53851	4.2246	-0.827512	0.00204777	-0.513601	0.0385531	-0.561381	0.0252547	-0.0947274	0.685638
AT1G01580.1_at	FRO2, FRD1, ATFRO2 | ferric reduction oxidase 2 | chr1:209395-213041 FORWARD LENGTH=2409	7.98657	8.00925	7.55512	8.8117	8.19877	-0.825129	0.0318887	-0.212204	0.557419	-0.0226798	0.949764	0.431452	0.239818
AT2G38390.1_at	Peroxidase superfamily protein | chr2:16079681-16081509 FORWARD LENGTH=1223	5.78263	6.10539	6.06221	6.60757	6.61649	-0.824942	8.93818e-06	-0.833856	7.81148e-06	-0.322755	0.0282971	-0.279583	0.0535937
AT1G60470.1_at	AtGolS4, GolS4 | galactinol synthase 4 | chr1:22278975-22280586 REVERSE LENGTH=1343	3.86821	4.35503	3.87166	4.6907	4.34891	-0.822486	0.00137949	-0.480701	0.0406891	-0.486815	0.038468	-0.00344866	0.987561
AT5G59090.3_at	ATSBT4.12, SBT4.12 | subtilase 4.12 | chr5:23851905-23855275 REVERSE LENGTH=2465	7.43346	7.50323	7.52143	8.2532	8.13101	-0.819735	0.00031058	-0.697547	0.00136185	-0.0697716	0.710065	-0.087965	0.639658
AT1G53920.1_at	GLIP5 | GDSL-motif lipase 5 | chr1:20137712-20139637 FORWARD LENGTH=1171	5.04771	5.22261	5.32887	5.866	5.63509	-0.818286	0.000602848	-0.587378	0.00810626	-0.1749	0.387822	-0.281153	0.171859
AT1G53340.1_at	Cysteine/Histidine-rich C1 domain family protein | chr1:19898928-19900931 REVERSE LENGTH=2004	3.64311	3.77423	3.94912	4.45809	4.1835	-0.814974	0.00462978	-0.540392	0.0461941	-0.131115	0.609956	-0.306007	0.241204
AT5G59670.1_at	Leucine-rich repeat protein kinase family protein | chr5:24041494-24045652 FORWARD LENGTH=2825	4.48902	4.79583	4.76788	5.30297	4.68749	-0.813948	0.0149088	-0.198476	0.520279	-0.30681	0.324127	-0.278865	0.369023
AT5G61010.1_at	ATEXO70E2, EXO70E2 | exocyst subunit exo70 family protein E2 | chr5:24553898-24556749 FORWARD LENGTH=2852	7.03147	7.36206	7.32661	7.84069	7.51723	-0.809221	0.000216896	-0.485758	0.0127866	-0.330592	0.0763913	-0.295135	0.110585
AT5G44730.1_at	Haloacid dehalogenase-like hydrolase (HAD) superfamily protein | chr5:18045496-18046806 REVERSE LENGTH=1147	3.31138	3.38633	3.94194	4.11961	3.7795	-0.808227	0.0298527	-0.468125	0.188955	-0.0749508	0.829461	-0.630567	0.082382
AT2G13570.1_at	NF-YB7 | nuclear factor Y, subunit B7 | chr2:5655842-5656489 REVERSE LENGTH=648	3.58983	3.61464	3.91604	4.39687	3.884	-0.807032	0.00189827	-0.294168	0.202506	-0.0248041	0.912457	-0.326203	0.159686
AT2G28160.1_at	FIT1, ATBHLH029, FRU, BHLH029, ATBHLH29, ATFIT1 | FER-like regulator of iron uptake | chr2:12004708-12006122 FORWARD LENGTH=1176	6.0845	6.35984	6.2759	6.88656	6.75687	-0.802061	7.77601e-05	-0.672377	0.000473842	-0.275342	0.0988691	-0.191401	0.242122
AT1G34780.1_at	ATAPRL4, APRL4 | APR-like 4 | chr1:12748571-12750383 REVERSE LENGTH=1456	6.19524	6.75166	6.77726	6.99618	6.60019	-0.800934	0.00174648	-0.404946	0.0802114	-0.556416	0.0201654	-0.582016	0.0157502
AT2G40610.1_at	ATEXPA8, EXP8, ATEXP8, ATHEXP ALPHA 1.11, EXPA8 | expansin A8 | chr2:16948863-16950557 REVERSE LENGTH=1105	7.16317	7.61668	7.09524	7.96231	7.51887	-0.799141	0.00238692	-0.355693	0.133918	-0.453503	0.0606267	0.0679343	0.76786
AT3G61898.1_at	unknown protein; FUNCTIONS IN: molecular_function unknown; INVOLVED IN: biological_process unknown; LOCATED IN: mitochondrion; Has 35333 Blast hits to 34131 proteins in 2444 species: Archae - 798; Bacteria - 22429; Metazoa - 974; Fungi - 991; Plants - 531; Viruses - 0; Other Eukaryotes - 9610 (source: NCBI BLink). | chr3:22922550-22922940 FORWARD LENGTH=305	3.28103	3.62144	3.6411	4.07933	3.54305	-0.798294	8.55043e-05	-0.262011	0.116393	-0.340406	0.0459776	-0.360067	0.035906
AT1G58320.1_at	PLAC8 family protein | chr1:21634123-21635303 REVERSE LENGTH=447	6.60791	6.84166	6.88668	7.40592	7.40616	-0.798013	0.00285461	-0.798254	0.00284802	-0.233751	0.326244	-0.278778	0.244296
AT5G20410.1_at	MGD2, ATMGD2 | monogalactosyldiacylglycerol synthase 2 | chr5:6896576-6898783 FORWARD LENGTH=1798	4.7848	4.6888	4.81942	5.58281	5.58338	-0.79801	0.000582479	-0.798582	0.00057861	0.0959945	0.623208	-0.0346215	0.858943
AT5G58010.1_at	LRL3 | LJRHL1-like 3 | chr5:23483545-23484889 REVERSE LENGTH=1019	5.48273	5.87166	5.53687	6.27818	6.42356	-0.795455	1.8586e-05	-0.940839	2.21433e-06	-0.38893	0.0116269	-0.0541478	0.700705
AT1G71380.1_at	ATGH9B3, ATCEL3, CEL3 | cellulase 3 | chr1:26899784-26901789 REVERSE LENGTH=1700	5.26913	5.42336	5.37437	6.05965	5.80196	-0.790516	0.000945732	-0.532822	0.016031	-0.154228	0.452133	-0.105239	0.606401
AT1G73300.1_at	scpl2 | serine carboxypeptidase-like 2 | chr1:27559673-27562048 REVERSE LENGTH=1326	3.97256	4.30048	4.57158	4.76116	5.74324	-0.788591	0.0493061	-1.77068	0.000162506	-0.327911	0.39252	-0.599017	0.126813
AT1G57560.1_at	AtMYB50, MYB50 | myb domain protein 50 | chr1:21316828-21318064 FORWARD LENGTH=1073	3.93714	3.85493	3.87512	4.72133	4.5928	-0.784185	4.60948e-05	-0.655659	0.000309459	0.082213	0.58462	0.062019	0.679519
AT1G68725.1_at	AGP19, ATAGP19 | arabinogalactan protein 19 | chr1:25809298-25810130 FORWARD LENGTH=747	5.60693	6.03704	5.77184	6.39064	6.01095	-0.783714	0.00537523	-0.404026	0.12061	-0.430111	0.0998933	-0.164918	0.514567
AT4G14103.2_at	F-box/RNI-like superfamily protein | chr4:8126915-8128833 FORWARD LENGTH=1608	3.70288	3.78035	4.24094	4.48564	3.96542	-0.782765	0.0265462	-0.262548	0.428681	-0.0774736	0.813874	-0.538068	0.114244
AT3G46880.1_at	unknown protein; FUNCTIONS IN: molecular_function unknown; INVOLVED IN: biological_process unknown; LOCATED IN: chloroplast; EXPRESSED IN: 14 plant structures; EXPRESSED DURING: 9 growth stages; BEST Arabidopsis thaliana protein match is: unknown protein (TAIR:AT5G59080.1); Has 51 Blast hits to 51 proteins in 8 species: Archae - 0; Bacteria - 0; Metazoa - 0; Fungi - 0; Plants - 51; Viruses - 0; O…	3.08286	3.3821	3.28399	3.86552	3.56524	-0.782664	0.000663893	-0.482377	0.0210718	-0.299235	0.134532	-0.201127	0.306269
AT4G00670.1_at	Remorin family protein | chr4:278316-279186 REVERSE LENGTH=506	4.26885	4.25388	4.76847	5.04793	4.99792	-0.779082	0.000703197	-0.729068	0.00126254	0.0149653	0.938529	-0.499616	0.0175966
AT4G12090.1_at	Cornichon family protein | chr4:7242165-7242924 REVERSE LENGTH=408	5.24588	5.17053	5.3713	6.02351	5.83243	-0.777624	0.000447232	-0.586548	0.00466402	0.0753563	0.683647	-0.125421	0.499387
AT1G52070.1_at	Mannose-binding lectin superfamily protein | chr1:19364888-19366924 REVERSE LENGTH=1224	4.91863	4.53712	5.18938	5.69291	6.02539	-0.774275	0.0055288	-1.10675	0.000271764	0.381511	0.138314	-0.270747	0.285626
AT3G45970.1_at	ATEXLA1, EXPL1, ATEXPL1, ATHEXP BETA 2.1, EXLA1 | expansin-like A1 | chr3:16896166-16897308 FORWARD LENGTH=989	5.10693	5.25818	5.37977	5.88082	5.5297	-0.773893	0.0137428	-0.422775	0.153438	-0.151255	0.600518	-0.272843	0.348966
AT2G03810.1_at	18S pre-ribosomal assembly protein gar2-related | chr2:1162523-1164573 FORWARD LENGTH=1787	2.73513	2.52168	2.22847	3.50826	2.92303	-0.773124	0.0206184	-0.187894	0.545455	0.213455	0.492827	0.506664	0.113768
AT5G48490.1_at	Bifunctional inhibitor/lipid-transfer protein/seed storage 2S albumin superfamily protein | chr5:19647835-19648281 REVERSE LENGTH=447	5.23709	5.49586	5.46279	6.00995	5.98557	-0.772862	7.93288e-06	-0.74848	1.18222e-05	-0.25877	0.0541625	-0.2257	0.0892266
AT5G42590.1_at	CYP71A16 | cytochrome P450, family 71, subfamily A, polypeptide 16 | chr5:17031111-17033726 REVERSE LENGTH=1686	4.86851	5.13522	4.9237	5.63543	5.80011	-0.766918	6.45354e-05	-0.931603	6.32488e-06	-0.266705	0.0898019	-0.0551893	0.715082
AT4G02330.1_at	ATPMEPCRB | Plant invertase/pectin methylesterase inhibitor superfamily | chr4:1032413-1035037 FORWARD LENGTH=1897	4.96651	5.02068	4.8694	5.73333	5.88419	-0.766816	0.00809919	-0.917672	0.00222333	-0.0541704	0.836051	0.0971134	0.711002
AT1G76240.1_at	Arabidopsis protein of unknown function (DUF241) | chr1:28602811-28603929 REVERSE LENGTH=1119	4.28782	4.13223	4.30307	5.05459	5.05779	-0.766761	2.27014e-05	-0.769963	2.16019e-05	0.155591	0.267145	-0.0152466	0.911912
AT2G26530.1_at	AR781 | Protein of unknown function (DUF1645) | chr2:11282775-11284229 REVERSE LENGTH=1455	6.27381	6.10142	6.70716	7.03909	6.7023	-0.765288	0.044524	-0.428494	0.242399	0.17239	0.632687	-0.433354	0.237298
AT5G02470.2_at	DPA | Transcription factor DP | chr5:542358-544874 REVERSE LENGTH=1249	3.78953	4.23393	3.96182	4.55436	4.33078	-0.764825	0.0212375	-0.541249	0.0911007	-0.444402	0.160036	-0.172287	0.577061
AT4G22212.1_at	Arabidopsis defensin-like protein | chr4:11753986-11754688 FORWARD LENGTH=582	5.25601	5.44585	5.39338	6.01736	5.97623	-0.761354	0.00041348	-0.720226	0.000695446	-0.189844	0.296732	-0.137377	0.446919
AT5G24780.2_at	VSP1, ATVSP1 | vegetative storage protein 1 | chr5:8507590-8508957 REVERSE LENGTH=1094	8.11574	8.6169	8.13412	8.87055	8.48423	-0.754815	0.0248144	-0.368495	0.247738	-0.501165	0.121539	-0.0183813	0.953149
AT2G24610.1_at	ATCNGC14, CNGC14 | cyclic nucleotide-gated channel 14 | chr2:10457045-10460508 FORWARD LENGTH=2398	4.19974	4.33981	4.47315	4.95253	4.51752	-0.752798	4.83847e-05	-0.31778	0.0384584	-0.140071	0.338233	-0.273409	0.0706914
AT1G26945.1_at	KDR | basic helix-loop-helix (bHLH) DNA-binding superfamily protein | chr1:9351454-9352761 FORWARD LENGTH=689	6.8318	6.83114	6.8196	7.58379	7.25129	-0.751986	0.000548496	-0.419485	0.0313275	0.000659434	0.997114	0.0122051	0.946628
AT5G61290.1_at	Flavin-binding monooxygenase family protein | chr5:24648558-24650815 FORWARD LENGTH=1595	4.68649	5.03534	4.93556	5.43617	5.39145	-0.749673	0.000294944	-0.704957	0.000533584	-0.348847	0.0523865	-0.249065	0.155501
AT5G22440.1_at	Ribosomal protein L1p/L10e family | chr5:7435076-7436686 REVERSE LENGTH=996	2.89439	3.00472	3.49972	3.64204	3.15717	-0.74765	0.0444294	-0.262785	0.457644	-0.110335	0.753636	-0.605336	0.0972917
AT3G53150.1_at	UGT73D1 | UDP-glucosyl transferase 73D1 | chr3:19697736-19699259 REVERSE LENGTH=1524	4.70018	4.94461	4.95749	5.44666	5.64338	-0.746483	7.48132e-05	-0.943195	4.53125e-06	-0.244427	0.113076	-0.25731	0.0965124
AT3G56970.1_at	BHLH038, ORG2 | basic helix-loop-helix (bHLH) DNA-binding superfamily protein | chr3:21084110-21085150 REVERSE LENGTH=912	5.10019	5.14792	5.03839	5.84631	6.65417	-0.746123	0.00430954	-1.55399	2.20356e-06	-0.0477342	0.837161	0.0618	0.790253
AT5G62920.1_at	ARR6 | response regulator 6 | chr5:25252386-25254212 REVERSE LENGTH=974	3.84651	3.86519	3.79122	4.59242	4.22782	-0.745915	5.67067e-06	-0.381311	0.00462405	-0.0186867	0.876083	0.05529	0.645396
AT4G12470.1_at	AZI1 | azelaic acid induced 1 | chr4:7401109-7401907 REVERSE LENGTH=799	6.76226	7.25632	6.79608	7.50472	7.118	-0.742456	0.00382802	-0.355734	0.129717	-0.494057	0.0406134	-0.0338162	0.881741
AT3G59350.2_at	Protein kinase superfamily protein | chr3:21932525-21935192 FORWARD LENGTH=1618	4.87291	5.02238	4.63396	5.61443	5.0236	-0.741523	0.0284813	-0.150691	0.634498	-0.149473	0.637223	0.238943	0.453102
AT5G24470.1_at	APRR5, PRR5 | pseudo-response regulator 5 | chr5:8355951-8358873 REVERSE LENGTH=2257	8.67752	8.58985	8.76019	9.41823	9.34016	-0.740707	0.0227031	-0.662639	0.0388276	0.0876726	0.771634	-0.0826704	0.784304
AT4G32330.2_at	TPX2 (targeting protein for Xklp2) protein family | chr4:15608912-15612285 FORWARD LENGTH=1935	4.56242	4.77076	4.91756	5.30238	4.85672	-0.739961	0.00671454	-0.2943	0.239495	-0.208346	0.400491	-0.355145	0.159309
AT3G02550.1_at	LBD41 | LOB domain-containing protein 41 | chr3:536505-537998 REVERSE LENGTH=1382	5.31796	5.68756	5.84554	6.05524	6.04375	-0.737285	4.66662e-05	-0.725791	5.57528e-05	-0.369599	0.0159023	-0.52758	0.00130505
AT1G22150.1_at	SULTR1;3 | sulfate transporter 1;3 | chr1:7818361-7821344 FORWARD LENGTH=1971	2.75521	2.84711	3.17959	3.49216	3.16705	-0.736956	0.0109434	-0.41184	0.130605	-0.0919002	0.727942	-0.424388	0.119987
AT1G52060.1_at	Mannose-binding lectin superfamily protein | chr1:19359039-19360675 REVERSE LENGTH=969	7.09351	6.12138	6.56266	7.82983	7.875	-0.736319	0.00206866	-0.781483	0.001264	0.972137	0.000159499	0.530851	0.0184782
AT4G00910.1_at	Aluminium activated malate transporter family protein | chr4:389370-391287 REVERSE LENGTH=1494	4.39222	4.98136	4.45122	5.12647	4.93614	-0.734248	0.00151652	-0.54392	0.0127666	-0.589137	0.00776994	-0.0589991	0.767942
AT4G25434.2_at	ATNUDT10, NUDT10 | nudix hydrolase homolog 10 | chr4:13003976-13005863 REVERSE LENGTH=1074	4.74938	4.92157	5.08337	5.48175	5.44623	-0.732378	0.000376818	-0.696851	0.000603524	-0.172189	0.31984	-0.333996	0.0625693
AT3G59880.1_at	unknown protein; FUNCTIONS IN: molecular_function unknown; INVOLVED IN: biological_process unknown; LOCATED IN: plasma membrane; BEST Arabidopsis thaliana protein match is: unknown protein (TAIR:AT2G44010.1); Has 20 Blast hits to 20 proteins in 7 species: Archae - 0; Bacteria - 0; Metazoa - 0; Fungi - 0; Plants - 20; Viruses - 0; Other Eukaryotes - 0 (source: NCBI BLink). | chr3:22120969-22121700…	4.64585	4.67066	4.84761	5.37754	5.36702	-0.731687	0.00099336	-0.721164	0.00112695	-0.0248057	0.89583	-0.201763	0.294273
AT3G10580.1_at	Homeodomain-like superfamily protein | chr3:3307051-3308233 REVERSE LENGTH=899	2.81151	3.3778	3.38333	3.54276	3.21187	-0.731252	0.0271222	-0.400364	0.20461	-0.566291	0.0789801	-0.571821	0.0763336
AT3G01290.1_at	SPFH/Band 7/PHB domain-containing membrane-associated protein family | chr3:88054-89422 REVERSE LENGTH=1122	8.02047	8.46843	8.50069	8.7512	8.94722	-0.730734	0.000137947	-0.92675	8.8778e-06	-0.447957	0.00858557	-0.480216	0.00539632
AT4G37800.1_at	XTH7 | xyloglucan endotransglucosylase/hydrolase 7 | chr4:17775474-17777397 REVERSE LENGTH=1136	8.84774	8.70239	8.9393	9.57846	9.2486	-0.730714	9.0425e-05	-0.400855	0.0133243	0.145357	0.333235	-0.0915608	0.538992
AT2G35930.1_at	PUB23 | plant U-box 23 | chr2:15082855-15084473 REVERSE LENGTH=1619	8.20469	8.34098	8.32471	8.9333	8.95749	-0.728609	5.28346e-05	-0.752805	3.63678e-05	-0.136295	0.339379	-0.120023	0.398822
AT1G78000.2_at	SULTR1;2, SEL1 | sulfate transporter 1;2 | chr1:29329844-29333146 FORWARD LENGTH=2276	8.37071	8.71377	8.37115	9.0962	9.277	-0.725494	2.09292e-05	-0.906288	1.21308e-06	-0.343063	0.0149963	-0.000441991	0.997277
AT5G23840.2_at	MD-2-related lipid recognition domain-containing protein | chr5:8035767-8036982 FORWARD LENGTH=906	3.21622	3.20919	3.21082	3.94106	4.00868	-0.724833	0.000203407	-0.792453	7.89373e-05	0.00703364	0.964671	0.00540651	0.97284
AT3G14850.2_at	TBL41 | TRICHOME BIREFRINGENCE-LIKE 41 | chr3:4995597-4997693 FORWARD LENGTH=1171	4.33534	4.47316	4.48801	5.05924	4.96704	-0.7239	4.83622e-05	-0.631705	0.000210189	-0.137822	0.327404	-0.152671	0.279413
AT5G57625.1_at	CAP (Cysteine-rich secretory proteins, Antigen 5, and Pathogenesis-related 1 protein) superfamily protein | chr5:23337850-23338807 FORWARD LENGTH=869	6.59536	7.08748	6.61982	7.31821	7.35701	-0.722846	0.00100501	-0.76165	0.0006281	-0.492116	0.0157529	-0.0244643	0.896144
AT2G34540.1_at	unknown protein; Has 19 Blast hits to 19 proteins in 5 species: Archae - 0; Bacteria - 0; Metazoa - 0; Fungi - 0; Plants - 19; Viruses - 0; Other Eukaryotes - 0 (source: NCBI BLink). | chr2:14550657-14552230 FORWARD LENGTH=1216	1.81351	2.19912	2.24094	2.53513	2.53266	-0.721621	0.000564629	-0.719151	0.000582923	-0.385607	0.0387488	-0.427429	0.0236531
AT5G26220.1_at	ChaC-like family protein | chr5:9162969-9164685 REVERSE LENGTH=932	5.44582	5.51748	5.21122	6.16642	5.65786	-0.720607	0.000447399	-0.212047	0.224513	-0.0716641	0.675859	0.234596	0.180972
AT5G20150.1_at	ATSPX1, SPX1 | SPX domain gene 1 | chr5:6802372-6803625 FORWARD LENGTH=1086	6.12673	5.73303	5.94483	6.84706	6.80738	-0.720336	0.00201297	-0.680658	0.00313315	0.393699	0.0644836	0.181891	0.3751
AT3G45650.1_at	NAXT1 | nitrate excretion transporter1 | chr3:16759253-16761266 FORWARD LENGTH=1677	7.53502	7.84356	7.81966	8.25503	8.33564	-0.720007	3.21819e-05	-0.800619	8.93041e-06	-0.308542	0.0304346	-0.284637	0.0439051
AT4G23200.1_at	CRK12 | cysteine-rich RLK (RECEPTOR-like protein kinase) 12 | chr4:12145380-12147934 REVERSE LENGTH=1947	3.33526	3.3419	3.35121	4.05238	4.07737	-0.717116	0.00243702	-0.742111	0.0018534	-0.00664197	0.974381	-0.0159517	0.938526
AT1G70700.2_at	TIFY7 | TIFY domain/Divergent CCT motif family protein | chr1:26654768-26657064 FORWARD LENGTH=1175	7.31772	7.3267	7.60438	8.03388	7.60825	-0.716156	0.00516667	-0.290525	0.21363	-0.00898087	0.968656	-0.286662	0.219523
AT3G02885.1_at	GASA5 | GAST1 protein homolog 5 | chr3:638021-639055 REVERSE LENGTH=640	6.87445	7.23075	6.95145	7.58472	7.23534	-0.710265	0.000178451	-0.36089	0.0283502	-0.356296	0.0301671	-0.076997	0.617483
AT5G07080.1_at	HXXXD-type acyl-transferase family protein | chr5:2200332-2202110 FORWARD LENGTH=1509	6.08881	6.1364	6.24855	6.79889	6.80446	-0.710084	1.39247e-05	-0.715654	1.26539e-05	-0.0475889	0.698363	-0.159741	0.202673
AT2G39530.1_at	Uncharacterised protein family (UPF0497) | chr2:16498486-16499471 REVERSE LENGTH=780	4.97013	5.06597	5.06613	5.67679	5.51989	-0.706667	1.47552e-05	-0.549765	0.000242284	-0.0958467	0.437974	-0.0960068	0.437223
AT1G74300.1_at	alpha/beta-Hydrolases superfamily protein | chr1:27935298-27936608 FORWARD LENGTH=1245	3.43339	3.83567	3.77179	4.13977	3.89864	-0.70638	0.0118198	-0.465249	0.0817785	-0.402279	0.128384	-0.338393	0.196738
AT5G55930.1_at	ATOPT1, OPT1 | oligopeptide transporter 1 | chr5:22652715-22656106 FORWARD LENGTH=2820	5.15159	5.03475	5.33059	5.85759	5.94005	-0.706004	0.0038628	-0.788459	0.00163205	0.116843	0.590674	-0.178997	0.412479
AT3G13435.1_at	unknown protein; FUNCTIONS IN: molecular_function unknown; INVOLVED IN: biological_process unknown; LOCATED IN: endomembrane system; Has 4 Blast hits to 4 proteins in 2 species: Archae - 0; Bacteria - 0; Metazoa - 0; Fungi - 0; Plants - 4; Viruses - 0; Other Eukaryotes - 0 (source: NCBI BLink). | chr3:4375425-4376069 FORWARD LENGTH=356	3.99833	4.26622	4.33422	4.70333	4.33986	-0.705	0.000603601	-0.341527	0.0600611	-0.267884	0.13301	-0.335887	0.0640086
AT1G65490.1_at	unknown protein; FUNCTIONS IN: molecular_function unknown; INVOLVED IN: biological_process unknown; LOCATED IN: endomembrane system; EXPRESSED IN: 22 plant structures; EXPRESSED DURING: 13 growth stages; BEST Arabidopsis thaliana protein match is: unknown protein (TAIR:AT1G65486.1); Has 23 Blast hits to 23 proteins in 2 species: Archae - 0; Bacteria - 0; Metazoa - 0; Fungi - 0; Plants - 23; Virus…	4.81681	5.1025	5.17339	5.52164	4.96259	-0.704835	0.000394049	-0.145779	0.382189	-0.285689	0.0960689	-0.356584	0.0417327
AT3G06310.1_at	Cox19-like CHCH family protein | chr3:1912968-1914392 REVERSE LENGTH=754	3.96153	3.86349	4.40962	4.66601	3.87203	-0.704489	0.00276046	0.0894919	0.665508	0.0980339	0.635971	-0.448093	0.0409224
AT4G25090.2_at	Riboflavin synthase-like superfamily protein | chr4:12878771-12883701 REVERSE LENGTH=2775	6.03429	6.4488	6.40007	6.73694	6.55647	-0.702655	6.55346e-06	-0.522187	0.00019872	-0.414514	0.00167925	-0.365787	0.00440388
AT4G29270.1_at	HAD superfamily, subfamily IIIB acid phosphatase chr4:14423662-14424882 REVERSE LENGTH=940	6.84622	7.34399	7.12911	7.54808	7.42655	-0.701856	2.41208e-05	-0.580327	0.000197639	-0.497763	0.000860346	-0.282885	0.0361456
AT5G63770.1_at	ATDGK2, DGK2 | diacylglycerol kinase 2 | chr5:25518641-25523621 FORWARD LENGTH=3580	4.96237	5.25077	5.3041	5.664	5.39663	-0.701634	0.0341049	-0.43426	0.173106	-0.288402	0.358691	-0.341738	0.279013
AT1G17190.1_at	ATGSTU26, GSTU26 | glutathione S-transferase tau 26 | chr1:5875350-5876545 FORWARD LENGTH=935	5.85978	6.20643	6.17379	6.55893	6.50539	-0.69915	6.46764e-06	-0.645604	1.73517e-05	-0.34665	0.00614781	-0.314006	0.0115957
AT3G25790.1_at	myb-like transcription factor family protein | chr3:9413127-9415003 FORWARD LENGTH=1195	4.05728	4.16237	4.16362	4.75536	4.60189	-0.698087	0.00135562	-0.544613	0.00854668	-0.10509	0.576527	-0.106346	0.572022
AT1G70700.1_at	JAZ9, TIFY7 | TIFY domain/Divergent CCT motif family protein | chr1:26654768-26657064 FORWARD LENGTH=1247	8.04123	7.98689	8.3629	8.73921	8.44346	-0.69798	0.0135867	-0.402229	0.132596	0.0543363	0.833931	-0.321668	0.22389
AT1G72140.1_at	Major facilitator superfamily protein | chr1:27141814-27144490 FORWARD LENGTH=1875	5.88106	6.30514	6.16461	6.57738	6.49011	-0.696321	3.48065e-05	-0.609045	0.000152628	-0.424072	0.00382302	-0.283548	0.0397308
AT1G73330.1_at	ATDR4, DR4 | drought-repressed 4 | chr1:27568718-27569717 REVERSE LENGTH=1000	9.05245	9.13314	9.2072	9.74677	9.87531	-0.694313	1.5362e-06	-0.822861	1.41535e-07	-0.0806852	0.428236	-0.154747	0.137377
AT2G01830.3_at	WOL, CRE1, WOL1, AHK4, ATCRE1 | CHASE domain containing histidine kinase protein | chr2:362983-369707 REVERSE LENGTH=3654	6.87411	6.969	7.03571	7.56672	7.68166	-0.692613	5.14557e-05	-0.807553	8.22708e-06	-0.0948927	0.480493	-0.1616	0.235587
AT5G17530.2_at	phosphoglucosamine mutase family protein | chr5:5777603-5782148 FORWARD LENGTH=2209	5.57312	5.83913	5.91055	6.26527	6.49775	-0.692149	0.0312394	-0.924631	0.00587951	-0.266006	0.381411	-0.337429	0.269922
AT4G26010.1_at	Peroxidase superfamily protein | chr4:13200593-13201941 FORWARD LENGTH=1246	6.81968	7.2037	6.90802	7.51096	7.49699	-0.691282	8.05033e-05	-0.677315	0.000100547	-0.384019	0.0116066	-0.0883467	0.526687
AT2G15090.1_at	KCS8 | 3-ketoacyl-CoA synthase 8 | chr2:6542256-6543947 FORWARD LENGTH=1692	6.17805	6.31086	6.49605	6.86841	6.74162	-0.690362	0.0126916	-0.563563	0.0365746	-0.132808	0.601348	-0.318001	0.218973
AT5G04460.1_at	RING/U-box superfamily protein | chr5:1260009-1263862 FORWARD LENGTH=2759	1.99396	2.29634	2.03912	2.68378	2.06742	-0.689825	0.0282718	-0.0734583	0.802535	-0.302382	0.309918	-0.0451649	0.87774
AT2G46060.1_at	transmembrane protein-related | chr2:18941099-18945099 REVERSE LENGTH=2779	1.99212	1.89839	2.01843	2.67957	1.99984	-0.68745	0.0429482	-0.0077135	0.980786	0.0937359	0.770038	-0.0263035	0.934551
AT4G36700.1_at	RmlC-like cupins superfamily protein | chr4:17298200-17300367 REVERSE LENGTH=1842	4.2361	4.51345	4.08405	4.92326	5.56857	-0.687154	0.0445674	-1.33247	0.000546126	-0.277345	0.395202	0.152049	0.638761
AT3G28345.1_at	ABC transporter family protein | chr3:10593753-10598775 REVERSE LENGTH=3891	6.62357	7.04398	6.80402	7.31028	7.62264	-0.686709	0.000556678	-0.999072	9.22039e-06	-0.42041	0.0197321	-0.180451	0.286892
AT4G29610.1_at	Cytidine/deoxycytidylate deaminase family protein | chr4:14517448-14518329 FORWARD LENGTH=882	4.00378	4.54381	4.16175	4.68419	4.2427	-0.680407	0.0255116	-0.238915	0.404088	-0.540033	0.0692287	-0.157972	0.579096
AT3G15500.1_at	ATNAC3, ANAC055, NAC055, NAC3 | NAC domain containing protein 3 | chr3:5234617-5236088 FORWARD LENGTH=1274	2.80476	3.21803	3.38971	3.48498	3.79315	-0.680214	0.00934048	-0.98839	0.000500375	-0.413265	0.0942219	-0.584953	0.0222244
AT5G26260.1_at	TRAF-like family protein | chr5:9200463-9202400 FORWARD LENGTH=1332	8.19241	8.51472	8.22054	8.8718	8.79089	-0.67939	4.3042e-05	-0.598485	0.000171713	-0.32231	0.0206831	-0.0281313	0.827452
AT5G18020.1_at	SAUR-like auxin-responsive protein family chr5:5966183-5966677 REVERSE LENGTH=495	3.07565	3.35961	3.07846	3.75389	3.5699	-0.678238	0.0251098	-0.494242	0.0920514	-0.283959	0.320297	-0.00280527	0.992056
AT4G38570.2_at	PIS2 | probable CDP-diacylglycerol--inositol 3-phosphatidyltransferase 2 | chr4:18031337-18033741 REVERSE LENGTH=1205	5.70672	5.93701	5.96632	6.38393	6.29285	-0.677214	0.000139796	-0.586129	0.000585356	-0.230289	0.119951	-0.259604	0.082246
AT4G04840.1_at	ATMSRB6, MSRB6 | methionine sulfoxide reductase B6 | chr4:2449560-2451589 FORWARD LENGTH=848	4.9003	4.57661	4.81504	5.57636	5.34526	-0.676059	0.00693096	-0.444958	0.0603139	0.323688	0.162154	0.0852556	0.705607
AT4G14060.1_at	Polyketide cyclase/dehydrase and lipid transport superfamily protein | chr4:8107337-8108307 FORWARD LENGTH=673	4.46556	4.93916	4.73857	5.13797	5.18449	-0.672409	0.0142283	-0.718926	0.00950593	-0.473593	0.0721399	-0.273008	0.285445
AT2G37700.2_at	Fatty acid hydroxylase superfamily | chr2:15811628-15814208 REVERSE LENGTH=1527	4.04694	4.06451	4.04198	4.71842	4.35453	-0.671482	0.00447723	-0.307587	0.154681	-0.0175714	0.933325	0.00496006	0.981157
AT2G38310.1_at	PYL4, RCAR10 | PYR1-like 4 | chr2:16050063-16051168 FORWARD LENGTH=1106	8.94029	8.64891	9.04782	9.60965	9.56297	-0.669362	0.000112891	-0.622681	0.000239461	0.291376	0.0469678	-0.107531	0.441729
AT2G43610.1_at	Chitinase family protein | chr2:18087840-18089224 REVERSE LENGTH=1104	6.50521	6.49684	6.77886	7.17335	7.77037	-0.668146	0.00117096	-1.26516	8.58793e-07	0.00836327	0.962159	-0.273653	0.132718
AT1G14780.1_at	MAC/Perforin domain-containing protein | chr1:5090990-5094152 FORWARD LENGTH=2193	5.97225	6.10532	6.18409	6.63888	6.60339	-0.666635	5.53779e-06	-0.631142	1.10193e-05	-0.133072	0.222717	-0.211847	0.0595099
AT1G05065.1_at	CLE20 | CLAVATA3/ESR-RELATED 20 | chr1:1454969-1455220 REVERSE LENGTH=252	4.33068	4.39317	4.529	4.99541	4.62455	-0.664739	0.0252153	-0.293876	0.295119	-0.062493	0.821243	-0.198323	0.476184
AT5G54060.1_at	UF3GT | UDP-glucose:flavonoid 3-o-glucosyltransferase | chr5:21936879-21938369 REVERSE LENGTH=1491	3.19695	3.34685	2.97671	3.86009	3.36056	-0.663132	0.0176048	-0.163606	0.527617	-0.149892	0.562441	0.220241	0.397275
AT4G16563.1_at	Eukaryotic aspartyl protease family protein | chr4:9329657-9331523 REVERSE LENGTH=1867	7.19701	7.04714	7.44349	7.85979	7.54876	-0.662778	0.000657668	-0.351744	0.0429423	0.149873	0.365931	-0.246478	0.14446
AT1G27170.1_at	transmembrane receptors;ATP binding | chr1:9434559-9439417 FORWARD LENGTH=4512	4.80364	5.33808	5.00734	5.4635	4.95858	-0.659859	0.0454585	-0.154938	0.620137	-0.534444	0.0988532	-0.2037	0.515675
AT5G54720.1_at	Ankyrin repeat family protein | chr5:22232195-22232949 REVERSE LENGTH=755	5.38237	5.38295	5.66715	6.04189	5.78933	-0.659521	0.0042336	-0.406966	0.0588139	-0.00057775	0.997748	-0.284785	0.1752
AT4G22460.1_at	Bifunctional inhibitor/lipid-transfer protein/seed storage 2S albumin superfamily protein | chr4:11839160-11839561 REVERSE LENGTH=402	4.29451	4.43918	4.67397	4.95311	4.92614	-0.6586	0.00186874	-0.631631	0.00260553	-0.144669	0.435001	-0.379464	0.0505287
AT2G32100.1_at	ATOFP16, OFP16 | ovate family protein 16 | chr2:13647852-13648785 FORWARD LENGTH=934	6.32424	6.29269	6.57754	6.9817	6.92432	-0.65746	0.00703961	-0.600078	0.0125025	0.0315491	0.885771	-0.253302	0.257217
AT4G30170.1_at	Peroxidase family protein | chr4:14762841-14764627 FORWARD LENGTH=1204	7.23219	7.48291	7.27751	7.88317	7.8834	-0.650986	0.00026185	-0.65121	0.000260949	-0.250717	0.0990281	-0.0453215	0.75691
AT4G36080.1_at	phosphotransferases, alcohol group as acceptor;binding;inositol or phosphatidylinositol kinases | chr4:17059824-17077982 REVERSE LENGTH=12031	6.78956	7.38288	7.25081	7.44045	7.54863	-0.650887	0.0208222	-0.759065	0.00847505	-0.593315	0.0330403	-0.461253	0.0895787
AT4G15380.1_at	CYP705A4 | cytochrome P450, family 705, subfamily A, polypeptide 4 | chr4:8788739-8790444 FORWARD LENGTH=1630	2.67458	2.99745	3.07653	3.32392	3.54773	-0.649343	0.0220983	-0.873151	0.00341171	-0.322876	0.22927	-0.401958	0.138656
AT1G16260.2_at	Wall-associated kinase family protein | chr1:5559579-5562113 REVERSE LENGTH=2336	6.02997	5.97469	6.21709	6.67925	6.40485	-0.649286	3.42063e-05	-0.374889	0.00553426	0.0552716	0.648312	-0.187122	0.133613
AT1G74210.1_at	PLC-like phosphodiesterases superfamily protein | chr1:27910314-27912941 FORWARD LENGTH=1417	7.31951	7.45487	7.36333	7.9683	7.92031	-0.64879	7.54455e-05	-0.600798	0.000171706	-0.135359	0.30304	-0.0438169	0.73545
AT1G73280.1_at	scpl3 | serine carboxypeptidase-like 3 | chr1:27552970-27555322 REVERSE LENGTH=1326	4.87378	4.86272	4.87421	5.52086	5.53964	-0.647082	0.0036516	-0.665857	0.002945	0.011059	0.955187	-0.000428053	0.998264
AT3G09220.1_at	LAC7 | laccase 7 | chr3:2827239-2830542 REVERSE LENGTH=1964	8.96473	9.25029	9.21842	9.61119	9.80599	-0.646464	7.2023e-05	-0.841268	2.95126e-06	-0.28556	0.0367797	-0.253689	0.060407
AT5G24530.1_at	DMR6 | 2-oxoglutarate (2OG) and Fe(II)-dependent oxygenase superfamily protein | chr5:8378833-8383401 FORWARD LENGTH=1404	6.43537	6.39575	6.52162	7.08166	6.6663	-0.646288	7.76595e-06	-0.230925	0.0409263	0.0396281	0.710104	-0.0862417	0.42186
AT3G05630.1_at	PLDP2, PDLZ2, PLDZETA2 | phospholipase D P2 | chr3:1635200-1640348 FORWARD LENGTH=3505	5.57068	5.28589	5.41357	6.21567	5.90588	-0.644989	3.24627e-05	-0.335197	0.010684	0.284789	0.026389	0.157112	0.19896
AT4G21870.1_at	HSP20-like chaperones superfamily protein | chr4:11603568-11604331 REVERSE LENGTH=639	7.05299	6.67564	7.24235	7.69794	7.62599	-0.644949	0.00272306	-0.572999	0.00640754	0.377359	0.0574881	-0.189352	0.322271
AT5G02760.1_at	Protein phosphatase 2C family protein | chr5:625254-627124 FORWARD LENGTH=1543	6.67395	6.39188	6.63112	7.3189	7.2046	-0.644947	0.00023272	-0.530654	0.00141755	0.282071	0.0609545	0.0428322	0.765102
AT2G37030.1_at	SAUR-like auxin-responsive protein family chr2:15553732-15554106 FORWARD LENGTH=375	3.84425	3.90245	4.11272	4.48863	4.56007	-0.644381	0.000765807	-0.715818	0.000282458	-0.058205	0.719872	-0.268477	0.110013
AT4G29690.1_at	Alkaline-phosphatase-like family protein | chr4:14540907-14542481 REVERSE LENGTH=1575	3.22429	3.54128	3.42444	3.86821	3.7689	-0.643921	0.0236013	-0.54461	0.0509836	-0.316998	0.23948	-0.200155	0.452418
AT4G28250.2_at	ATEXPB3, EXPB3, ATHEXP BETA 1.6 | expansin B3 | chr4:14000038-14002069 REVERSE LENGTH=1309	8.61397	9.00342	8.6689	9.25631	8.97491	-0.642344	0.000737732	-0.360943	0.0352002	-0.389456	0.0243593	-0.0549367	0.733081
AT4G11210.1_at	Disease resistance-responsive (dirigent-like protein) family protein | chr4:6832691-6833245 FORWARD LENGTH=555	4.74048	4.63711	4.69753	5.3822	5.40121	-0.641726	0.0139725	-0.66073	0.0117582	0.103372	0.666542	0.042943	0.85763
AT5G05040.1_at	Cystatin/monellin superfamily protein | chr5:1487260-1487968 REVERSE LENGTH=516	2.86143	3.38295	3.15985	3.50311	3.10621	-0.641683	0.0243862	-0.244782	0.361364	-0.521525	0.0612447	-0.298427	0.268448
AT2G18193.1_at	P-loop containing nucleoside triphosphate hydrolases superfamily protein | chr2:7917505-7919277 REVERSE LENGTH=1697	2.78682	2.75795	2.84613	3.4285	3.04656	-0.64168	0.0045111	-0.259737	0.206235	0.0288699	0.885766	-0.0593117	0.76809
AT5G23220.1_at	NIC3 | nicotinamidase 3 | chr5:7819816-7820676 REVERSE LENGTH=861	5.52808	5.81073	5.68364	6.16973	5.98734	-0.641653	0.00463805	-0.459264	0.0328916	-0.282646	0.17225	-0.155562	0.444251
AT1G51270.3_at	structural molecules;transmembrane receptors;structural molecules | chr1:19007510-19011272 FORWARD LENGTH=2028	4.96403	4.93443	4.68239	5.60547	5.50158	-0.641438	0.00959905	-0.537545	0.0259276	0.0295984	0.895247	0.281641	0.219904
AT2G20080.1_at	unknown protein; FUNCTIONS IN: molecular_function unknown; INVOLVED IN: biological_process unknown; LOCATED IN: chloroplast; BEST Arabidopsis thaliana protein match is: unknown protein (TAIR:AT4G28840.1); Has 35333 Blast hits to 34131 proteins in 2444 species: Archae - 798; Bacteria - 22429; Metazoa - 974; Fungi - 991; Plants - 531; Viruses - 0; Other Eukaryotes - 9610 (source: NCBI BLink). | chr…	4.68672	4.52598	4.48656	5.32694	5.64	-0.640211	0.0402601	-0.953278	0.00403583	0.160741	0.585982	0.20016	0.498597
AT1G12030.1_at	Protein of unknown function (DUF506) chr1:4064667-4066341 REVERSE LENGTH=994	5.42615	5.39382	5.58482	6.06538	6.52925	-0.639235	0.00250256	-1.10311	9.77723e-06	0.0323264	0.861333	-0.158675	0.395824
AT4G28260.1_at	unknown protein; Has 50 Blast hits to 42 proteins in 12 species: Archae - 0; Bacteria - 0; Metazoa - 1; Fungi - 0; Plants - 49; Viruses - 0; Other Eukaryotes - 0 (source: NCBI BLink). | chr4:14004485-14006970 FORWARD LENGTH=2322	7.56432	7.81576	7.97677	8.20213	8.27735	-0.637808	0.000868518	-0.713024	0.000304843	-0.251439	0.134202	-0.412443	0.019109
AT3G04210.1_at	Disease resistance protein (TIR-NBS class) | chr3:1105963-1108069 REVERSE LENGTH=1940	5.61645	5.77301	5.8951	6.25414	6.26963	-0.637696	8.08386e-05	-0.653185	6.19684e-05	-0.156566	0.230899	-0.278656	0.0404584
AT5G53048.1_at	other RNA | chr5:21509861-21511850 FORWARD LENGTH=936	6.3699	5.69113	6.30411	7.00676	6.87627	-0.636854	0.014758	-0.506367	0.0459992	0.678767	0.010087	0.0657872	0.783973
AT5G47450.1_at	ATTIP2;3, TIP2;3, DELTA-TIP3 | tonoplast intrinsic protein 2;3 | chr5:19248249-19249504 REVERSE LENGTH=1051	5.58442	6.10229	5.69573	6.22026	6.30636	-0.635837	0.00057868	-0.721936	0.00016567	-0.517868	0.00324795	-0.111309	0.475963
AT3G02040.1_at	SRG3 | senescence-related gene 3 | chr3:348167-350010 REVERSE LENGTH=1525	7.24771	6.84586	7.23697	7.88318	8.02019	-0.635476	0.000113761	-0.772486	1.19956e-05	0.401847	0.00620656	0.0107353	0.935039
AT2G23630.1_at	sks16 | SKU5 similar 16 | chr2:10052566-10055317 REVERSE LENGTH=1647	5.23424	5.09365	5.28902	5.86965	6.00034	-0.635414	0.00279896	-0.766106	0.000571376	0.140583	0.454654	-0.0547813	0.769295
AT3G23175.1_at	HR-like lesion-inducing protein-related | chr3:8274000-8275470 REVERSE LENGTH=942	5.848	6.10122	6.05654	6.48341	6.55708	-0.635411	2.89652e-05	-0.70908	7.62658e-06	-0.25322	0.0407679	-0.208537	0.0862508
AT1G65985.1_at	Plant protein of unknown function (DUF247) | chr1:24562553-24568530 REVERSE LENGTH=1456	5.54813	5.49422	5.55722	6.18213	6.09793	-0.634	0.000506425	-0.549801	0.0017742	0.0539062	0.724027	-0.00908763	0.952455
AT2G35384.1_at	snoRNA | chr2:14894549-14894627 REVERSE LENGTH=79	2.70029	2.6979	2.88747	3.33321	3.12121	-0.632927	0.00291635	-0.420925	0.0345686	0.00238292	0.989823	-0.18718	0.323046
AT1G31173.1_at	MIR167D | MIR167D; miRNA | chr1:11137365-11138969 FORWARD LENGTH=1605	4.56626	4.45235	4.61851	5.19761	4.86432	-0.631349	0.00313721	-0.298056	0.125472	0.113916	0.546928	-0.0522479	0.781479
AT4G30740.1_at	unknown protein; FUNCTIONS IN: molecular_function unknown; INVOLVED IN: biological_process unknown; LOCATED IN: chloroplast; BEST Arabidopsis thaliana protein match is: Family of unknown function (DUF566) (TAIR:AT4G30710.1); Has 43 Blast hits to 43 proteins in 9 species: Archae - 0; Bacteria - 0; Metazoa - 0; Fungi - 0; Plants - 43; Viruses - 0; Other Eukaryotes - 0 (source: NCBI BLink). | chr4:1…	4.99917	5.35462	5.40826	5.62992	5.45046	-0.630742	0.0477357	-0.451282	0.145988	-0.355443	0.246947	-0.409082	0.185278
AT3G58810.2_at	MTPA2, ATMTPA2, MTP3 | metal tolerance protein A2 | chr3:21749966-21752008 FORWARD LENGTH=1926	3.28028	3.51431	3.39413	3.91093	3.80059	-0.630647	0.00615288	-0.520314	0.0197543	-0.234034	0.26525	-0.113855	0.582846
AT5G59470.1_at	Mannose-P-dolichol utilization defect 1 protein | chr5:23978556-23979478 FORWARD LENGTH=839	1.58103	1.86537	1.98205	2.21134	1.80974	-0.63031	0.00881539	-0.228704	0.301171	-0.284338	0.202208	-0.401013	0.0782512
AT4G14090.1_at	UDP-Glycosyltransferase superfamily protein | chr4:8122188-8123835 REVERSE LENGTH=1648	4.30348	4.82583	4.25474	4.93278	4.45744	-0.629302	0.0035546	-0.153968	0.42361	-0.522355	0.0123386	0.0487363	0.798457
AT2G26530.2_at	AR781 | Protein of unknown function (DUF1645) | chr2:11282775-11284211 REVERSE LENGTH=1356	6.4879	6.55636	6.75063	7.11682	7.04821	-0.62892	0.000582001	-0.560312	0.00160579	-0.0684591	0.656397	-0.262727	0.099493
AT2G23130.1_at	AGP17, ATAGP17 | arabinogalactan protein 17 | chr2:9844350-9845385 FORWARD LENGTH=818	7.22018	7.16739	7.3664	7.84607	7.60414	-0.625889	0.000623975	-0.383952	0.0208429	0.0527976	0.731914	-0.146211	0.347973
AT5G19190.1_at	unknown protein; BEST Arabidopsis thaliana protein match is: unknown protein (TAIR:AT3G06070.1); Has 1807 Blast hits to 1807 proteins in 277 species: Archae - 0; Bacteria - 0; Metazoa - 736; Fungi - 347; Plants - 385; Viruses - 0; Other Eukaryotes - 339 (source: NCBI BLink). | chr5:6457260-6458031 FORWARD LENGTH=667	6.36162	6.32317	6.42016	6.98596	6.97831	-0.624338	0.00810297	-0.616696	0.00877046	0.0384491	0.856822	-0.0585411	0.783672
AT5G37440.1_at	Chaperone DnaJ-domain superfamily protein | chr5:14844359-14845560 REVERSE LENGTH=1202	3.28569	3.49119	3.71424	3.9094	3.67685	-0.623711	0.0024779	-0.391165	0.0409556	-0.205505	0.262713	-0.428554	0.0267236
AT5G18030.1_at	SAUR-like auxin-responsive protein family chr5:5968435-5968938 FORWARD LENGTH=504	5.58629	5.41622	5.68457	6.2087	6.0977	-0.622408	0.046612	-0.511416	0.0962235	0.170073	0.566818	-0.0982854	0.739885
AT2G03090.1_at	ATEXPA15, EXP15, ATEXP15, ATHEXP ALPHA 1.3, EXPA15 | expansin A15 | chr2:916854-918643 REVERSE LENGTH=1358	6.26098	6.36617	6.06064	6.88281	6.60391	-0.621834	0.00600718	-0.342932	0.10347	-0.10519	0.605372	0.20034	0.32975
AT3G17611.2_at	ATRBL14, RBL14 | RHOMBOID-like protein 14 | chr3:6024913-6026443 FORWARD LENGTH=1531	2.85325	2.83985	3.07595	3.47481	2.83491	-0.621559	0.0307398	0.0183482	0.945636	0.0133998	0.960282	-0.222696	0.412296
AT3G22570.1_at	Bifunctional inhibitor/lipid-transfer protein/seed storage 2S albumin superfamily protein | chr3:8000515-8001238 REVERSE LENGTH=724	3.25785	3.25206	3.38949	3.87844	3.56339	-0.620588	0.00295553	-0.305538	0.108449	0.00578904	0.974833	-0.131634	0.476308
AT3G13650.1_at	Disease resistance-responsive (dirigent-like protein) family protein | chr3:4462892-4463872 FORWARD LENGTH=981	3.38756	3.57371	3.42259	4.00809	3.9892	-0.620528	0.000148121	-0.601638	0.000204035	-0.186146	0.169262	-0.0350271	0.790694
AT1G04250.1_at	AXR3, IAA17 | AUX/IAA transcriptional regulator family protein | chr1:1136258-1138613 FORWARD LENGTH=1087	5.31226	5.49434	5.6514	5.9315	5.82991	-0.619243	0.00475521	-0.517654	0.0149589	-0.182082	0.356957	-0.339144	0.0951238
AT2G26440.1_at	Plant invertase/pectin methylesterase inhibitor superfamily | chr2:11247383-11249493 FORWARD LENGTH=1754	5.05899	5.09961	5.39109	5.67797	5.79956	-0.618981	0.00345349	-0.74057	0.000790197	-0.0406238	0.827986	-0.332101	0.0881192
AT5G58550.1_at	EOL2 | ETO1-like 2 | chr5:23665295-23668474 REVERSE LENGTH=2934	2.61556	2.65421	2.76611	3.23327	2.76277	-0.617706	0.00724468	-0.147209	0.480434	-0.0386499	0.852077	-0.150551	0.470667
AT4G13410.1_at	ATCSLA15, CSLA15 | Nucleotide-diphospho-sugar transferases superfamily protein | chr4:7792219-7795824 REVERSE LENGTH=1614	3.65184	3.52981	3.64116	4.26807	3.80976	-0.616227	0.0229327	-0.157915	0.532325	0.122028	0.628662	0.0106829	0.966119
AT4G08850.1_at	Leucine-rich repeat receptor-like protein kinase family protein | chr4:5636489-5640636 REVERSE LENGTH=3482	5.90635	6.05802	6.36338	6.52195	6.98497	-0.615597	0.035081	-1.07861	0.000843041	-0.151668	0.581644	-0.457031	0.107987
AT2G45130.1_at	ATSPX3, SPX3 | SPX domain gene 3 | chr2:18606410-18607853 FORWARD LENGTH=916	2.33952	2.44264	2.40971	2.95396	2.77726	-0.614446	0.00225332	-0.437746	0.0208651	-0.103125	0.558593	-0.0701976	0.689753
AT5G19520.1_at	MSL9, ATMSL9 | mechanosensitive channel of small conductance-like 9 | chr5:6585421-6588936 FORWARD LENGTH=2530	4.61842	4.46454	4.65553	5.23207	5.33688	-0.613648	0.00158114	-0.718453	0.000383356	0.153883	0.364514	-0.0371036	0.825061
AT3G44990.1_at	XTR8, ATXTR8, XTH31 | xyloglucan endo-transglycosylase-related 8 | chr3:16446975-16448764 REVERSE LENGTH=1273	8.06733	8.45034	8.05714	8.68002	8.21773	-0.612691	0.00721887	-0.150401	0.467298	-0.383011	0.0746915	0.010189	0.960434
AT3G47040.2_at	Glycosyl hydrolase family protein | chr3:17324162-17327152 REVERSE LENGTH=2051	3.9446	4.40513	3.85817	4.55678	4.73488	-0.612179	0.00136287	-0.790284	0.000118446	-0.460526	0.0107789	0.086426	0.600503
AT2G13810.1_at	ALD1 | AGD2-like defense response protein 1 | chr2:5768446-5772259 FORWARD LENGTH=1535	3.21126	3.32405	3.36666	3.82321	3.53303	-0.611947	0.00181805	-0.321766	0.0710271	-0.112789	0.509976	-0.1554	0.366569
AT5G61590.1_at	Integrase-type DNA-binding superfamily protein | chr5:24764438-24765324 REVERSE LENGTH=887	6.11075	6.22428	6.59551	6.71689	6.83478	-0.606147	0.0102776	-0.724038	0.00302281	-0.113538	0.598393	-0.48476	0.0342482
AT2G41100.4_at	TCH3 | Calcium-binding EF hand family protein | chr2:17137829-17139607 FORWARD LENGTH=1252	7.71603	7.4454	8.04814	8.32161	8.61229	-0.605589	0.0197672	-0.896261	0.00134329	0.270625	0.26831	-0.332118	0.177938
AT3G23800.1_at	SBP3 | selenium-binding protein 3 | chr3:8581654-8583835 FORWARD LENGTH=1621	4.99391	4.99169	4.9715	5.59947	5.57314	-0.605557	0.000300181	-0.579232	0.000461938	0.00222249	0.987141	0.0224091	0.870952
AT5G06570.2_at	alpha/beta-Hydrolases superfamily protein | chr5:2007600-2011041 REVERSE LENGTH=1318	5.25761	5.42279	5.51025	5.86302	5.77311	-0.605412	0.000228129	-0.515499	0.00103894	-0.165178	0.227675	-0.252638	0.0720817
AT4G40090.1_at	AGP3 | arabinogalactan protein 3 | chr4:18580838-18581585 REVERSE LENGTH=748	4.36882	4.66816	4.24042	4.97274	4.77864	-0.603917	0.0112443	-0.409822	0.0714876	-0.299335	0.178939	0.1284	0.55614
AT5G08130.2_at	BIM1 | basic helix-loop-helix (bHLH) DNA-binding superfamily protein | chr5:2606200-2610123 REVERSE LENGTH=2597	6.23535	6.19438	6.49031	6.83916	6.67309	-0.603808	0.0458223	-0.43774	0.137407	0.0409758	0.885945	-0.254957	0.377243
AT4G02600.1_at	MLO1, ATMLO1 | Seven transmembrane MLO family protein | chr4:1143999-1147409 FORWARD LENGTH=1976	5.22643	5.62267	5.65505	5.82942	5.74164	-0.602982	0.0277395	-0.515201	0.0557095	-0.396236	0.133186	-0.428611	0.106084
AT4G35350.2_at	XCP1 | xylem cysteine peptidase 1 | chr4:16810482-16812004 FORWARD LENGTH=1340	5.24617	5.38579	5.2337	5.84655	5.82813	-0.600379	0.000239078	-0.581961	0.000326025	-0.139619	0.303357	0.012477	0.925622
AT2G29130.1_at	LAC2, ATLAC2 | laccase 2 | chr2:12524889-12527747 REVERSE LENGTH=2070	5.81572	6.37327	5.95	6.41606	6.27867	-0.600333	0.00830254	-0.462946	0.0346645	-0.557542	0.0130959	-0.134272	0.516188
AT2G41990.1_at	CONTAINS InterPro DOMAIN/s: Late embryogenesis abundant protein, group 2 (InterPro:IPR004864); BEST Arabidopsis thaliana protein match is: Late embryogenesis abundant (LEA) hydroxyproline-rich glycoprotein family (TAIR:AT4G35170.1); Has 172 Blast hits to 168 proteins in 15 species: Archae - 0; Bacteria - 0; Metazoa - 0; Fungi - 0; Plants - 172; Viruses - 0; Other Eukaryotes - 0 (source: NCBI BLin…	4.72176	4.78186	4.91719	5.32114	5.25073	-0.599381	0.000313749	-0.528976	0.00100388	-0.060107	0.661938	-0.195432	0.165404
AT4G01680.3_at	MYB55 | myb domain protein 55 | chr4:716004-717579 REVERSE LENGTH=1287	2.96951	3.01756	3.02885	3.56866	3.30384	-0.599146	0.003487	-0.334332	0.0773915	-0.0480493	0.790948	-0.0593378	0.743526
AT1G43100.1_at	Pectin lyase-like superfamily protein | chr1:16220519-16222473 REVERSE LENGTH=1335	1.86556	1.91005	2.01998	2.46391	2.01339	-0.598347	0.0117749	-0.147827	0.497979	-0.0444844	0.837472	-0.154416	0.479275
AT5G56100.1_at	glycine-rich protein / oleosin | chr5:22717115-22717751 FORWARD LENGTH=637	6.2259	6.07448	6.61927	6.82379	6.65789	-0.597887	0.00566764	-0.431989	0.0359447	0.151425	0.437462	-0.393365	0.0537316
AT5G62162.1_at	MIR399C | MIR399C; miRNA | chr5:24962485-24962598 FORWARD LENGTH=114	5.5673	5.3672	5.61884	6.16383	6.12801	-0.596528	0.00535273	-0.560714	0.00811322	0.200096	0.302912	-0.0515387	0.787867
AT5G44580.1_at	unknown protein; FUNCTIONS IN: molecular_function unknown; INVOLVED IN: biological_process unknown; LOCATED IN: endomembrane system; EXPRESSED IN: 18 plant structures; EXPRESSED DURING: 12 growth stages; BEST Arabidopsis thaliana protein match is: unknown protein (TAIR:AT5G44582.1); Has 30201 Blast hits to 17322 proteins in 780 species: Archae - 12; Bacteria - 1396; Metazoa - 17338; Fungi - 3422;…	8.10737	8.59068	8.25644	8.70254	8.72502	-0.595168	0.0121699	-0.617646	0.00970105	-0.483313	0.0362744	-0.149068	0.494497
AT4G14130.1_at	XTR7, XTH15 | xyloglucan endotransglucosylase/hydrolase 15 | chr4:8137051-8138281 REVERSE LENGTH=1065	6.25423	5.87817	6.34525	6.84933	7.16716	-0.595097	0.000205806	-0.912932	1.22279e-06	0.376058	0.00904336	-0.0910124	0.488553

## Sheet: 291 up in C12
Identifier	Description	Col	GRXC2	SSMS9	CCMC8	CCMC12	Col-GRXC2_logFC	Col-GRXC2_P.Value	Col-SSMS9_logFC	Col-SSMS9_P.Value	Col-CCMC8_logFC	Col-CCMC8_P.Value	Col-CCMC12_logFC	Col-CCMC12_P.Value	Col-CCMC12_adj.P.Val
AT1G78920.1_at	AVP2, AVPL1, AtVHP2;1, VHP2;1, VP2 | vacuolar H+-pyrophosphatase 2 | chr1:29671493-29676992 FORWARD LENGTH=3093	2.90395	3.32518	4.30996	3.9237	5.32245	-0.421232	0.573293	-1.40602	0.0714162	-1.01975	0.181746	-2.41851	0.00399568	0.177759
AT5G42600.1_at	MRN1 | marneral synthase | chr5:17053517-17058245 FORWARD LENGTH=2605	4.37223	4.75978	4.21645	6.03082	6.58181	-0.387548	0.113515	0.155779	0.512329	-1.65859	1.16749e-06	-2.20957	1.82344e-08	4.4642e-05
AT4G33120.1_at	S-adenosyl-L-methionine-dependent methyltransferases superfamily protein | chr4:15975386-15978111 REVERSE LENGTH=1315	3.40557	3.73682	3.71745	4.71861	5.59289	-0.331252	0.172678	-0.311888	0.197875	-1.31305	2.34321e-05	-2.18732	2.16678e-08	4.92587e-05
AT1G61750.1_at	Receptor-like protein kinase-related family protein | chr1:22804613-22806318 REVERSE LENGTH=1026	4.62747	4.65148	4.70355	5.89586	6.77692	-0.0240183	0.874675	-0.0760795	0.618461	-1.26839	1.02641e-07	-2.14946	2.37231e-11	1.88759e-07
AT1G45015.2_at	MD-2-related lipid recognition domain-containing protein | chr1:17021684-17022781 FORWARD LENGTH=616	3.46629	3.29671	3.73643	4.57617	5.25199	0.169582	0.490154	-0.270143	0.276463	-1.10988	0.000211768	-1.7857	6.60233e-07	0.000600378
AT1G73300.1_at	scpl2 | serine carboxypeptidase-like 2 | chr1:27559673-27562048 REVERSE LENGTH=1326	3.97256	4.30048	4.57158	4.76116	5.74324	-0.327911	0.39252	-0.599017	0.126813	-0.788591	0.0493061	-1.77068	0.000162506	0.0239449
AT1G76930.2_at	ATEXT4, ORG5, ATEXT1, EXT1, EXT4 | extensin 4 | chr1:28895301-28896883 REVERSE LENGTH=1106	7.56689	7.8421	7.89266	8.60867	9.28686	-0.27521	0.129391	-0.325766	0.0761651	-1.04177	1.04573e-05	-1.71996	8.95007e-09	2.78089e-05
AT5G23990.1_at	ATFRO5, FRO5 | ferric reduction oxidase 5 | chr5:8105565-8108590 REVERSE LENGTH=1974	5.47592	6.14984	5.4294	7.11553	7.15406	-0.67392	0.0560189	0.0465197	0.889505	-1.63961	9.68211e-05	-1.67815	7.5104e-05	0.0150917
AT2G05830.2_at	NagB/RpiA/CoA transferase-like superfamily protein | chr2:2229701-2232106 FORWARD LENGTH=1530	2.61147	3.63748	3.7369	3.97205	4.24967	-1.02601	0.168243	-1.12543	0.132692	-1.36058	0.0729822	-1.6382	0.0340829	0.466258
AT2G29540.1_at	ATRPC14, ATRPAC14, RPC14 | RNApolymerase 14 kDa subunit | chr2:12642571-12643944 FORWARD LENGTH=641	2.77953	2.85467	3.29123	2.92504	4.37649	-0.0751386	0.849968	-0.511699	0.207598	-0.145514	0.714496	-1.59696	0.000691802	0.0625511
AT1G45015.1_at	MD-2-related lipid recognition domain-containing protein | chr1:17021610-17022781 FORWARD LENGTH=656	4.63317	4.41732	4.4321	5.58948	6.21144	0.215856	0.467284	0.201073	0.497911	-0.956304	0.00402887	-1.57827	3.56496e-05	0.00907697
AT5G42580.1_at	CYP705A12 | cytochrome P450, family 705, subfamily A, polypeptide 12 | chr5:17023646-17025229 REVERSE LENGTH=1500	4.87898	5.44418	5.11235	6.03168	6.43435	-0.565203	0.0383542	-0.233373	0.368642	-1.1527	0.000239737	-1.55537	7.9886e-06	0.00313893
AT3G56970.1_at	BHLH038, ORG2 | basic helix-loop-helix (bHLH) DNA-binding superfamily protein | chr3:21084110-21085150 REVERSE LENGTH=912	5.10019	5.14792	5.03839	5.84631	6.65417	-0.0477342	0.837161	0.0618	0.790253	-0.746123	0.00430954	-1.55399	2.20356e-06	0.00125849
AT3G49260.2_at	iqd21 | IQ-domain 21 | chr3:18262511-18265980 FORWARD LENGTH=1781	2.80052	3.47594	2.58965	3.89235	4.32756	-0.675424	0.172456	0.21087	0.662712	-1.09183	0.033774	-1.52705	0.00479253	0.19396
AT5G57410.2_at	Afadin/alpha-actinin-binding protein | chr5:23264896-23267818 REVERSE LENGTH=1509	3.05422	3.8642	3.61908	3.76362	4.54503	-0.809988	0.251016	-0.564869	0.41904	-0.709408	0.31268	-1.49082	0.0424327	0.503055
AT2G01880.1_at	PAP7, ATPAP7 | purple acid phosphatase 7 | chr2:391423-394032 REVERSE LENGTH=1192	4.68349	5.09494	5.05411	5.95805	6.13371	-0.411445	0.0584475	-0.370621	0.085434	-1.27456	6.37684e-06	-1.45022	1.16437e-06	0.000810784
AT1G21100.1_at	O-methyltransferase family protein | chr1:7386839-7388428 REVERSE LENGTH=1384	4.99395	5.58674	5.36319	6.34598	6.39085	-0.592791	0.0325901	-0.369241	0.166585	-1.35203	4.94165e-05	-1.3969	3.3967e-05	0.00895144
AT2G48100.2_at	Exonuclease family protein | chr2:19670685-19673292 FORWARD LENGTH=1686	4.34195	4.62058	5.06609	4.56553	5.7292	-0.278627	0.577275	-0.724138	0.157288	-0.223582	0.654188	-1.38725	0.0111137	0.290884
AT1G27020.1_at	unknown protein; BEST Arabidopsis thaliana protein match is: unknown protein (TAIR:AT1G27030.1); Has 514 Blast hits to 514 proteins in 175 species: Archae - 0; Bacteria - 311; Metazoa - 0; Fungi - 0; Plants - 65; Viruses - 0; Other Eukaryotes - 138 (source: NCBI BLink). | chr1:9378559-9380692 FORWARD LENGTH=1276	5.53563	5.89133	5.76325	6.52732	6.91746	-0.355695	0.0763015	-0.227619	0.244522	-0.991688	5.3451e-05	-1.38183	8.20236e-07	0.000686991
AT4G36700.1_at	RmlC-like cupins superfamily protein | chr4:17298200-17300367 REVERSE LENGTH=1842	4.2361	4.51345	4.08405	4.92326	5.56857	-0.277345	0.395202	0.152049	0.638761	-0.687154	0.0445674	-1.33247	0.000546126	0.0533463
AT4G12545.1_at	Bifunctional inhibitor/lipid-transfer protein/seed storage 2S albumin superfamily protein | chr4:7434199-7434858 FORWARD LENGTH=660	5.11028	5.39269	5.49052	6.58219	6.39634	-0.28241	0.279074	-0.380243	0.150202	-1.47191	1.57765e-05	-1.28606	7.53946e-05	0.0150917
AT1G73010.1_at	ATPS2, PS2 | phosphate starvation-induced gene 2 | chr1:27464572-27466256 REVERSE LENGTH=1172	4.67177	4.41848	4.53905	6.11278	5.95096	0.253297	0.295119	0.132722	0.579078	-1.44101	8.17906e-06	-1.27918	3.45e-05	0.00895144
AT3G14120.1_at	FUNCTIONS IN: molecular_function unknown; INVOLVED IN: transport; LOCATED IN: nuclear pore; EXPRESSED IN: 23 plant structures; EXPRESSED DURING: 13 growth stages; CONTAINS InterPro DOMAIN/s: Nuclear pore protein 84/107 (InterPro:IPR007252); Has 5399 Blast hits to 5001 proteins in 612 species: Archae - 19; Bacteria - 730; Metazoa - 2186; Fungi - 823; Plants - 382; Viruses - 37; Other Eukaryotes - …	1.6702	2.18962	1.79623	2.07086	2.94167	-0.519427	0.270459	-0.126036	0.785821	-0.400658	0.392079	-1.27147	0.0122073	0.300314
AT2G43610.1_at	Chitinase family protein | chr2:18087840-18089224 REVERSE LENGTH=1104	6.50521	6.49684	6.77886	7.17335	7.77037	0.00836327	0.962159	-0.273653	0.132718	-0.668146	0.00117096	-1.26516	8.58793e-07	0.000695572
AT1G08125.2_at	S-adenosyl-L-methionine-dependent methyltransferases superfamily protein | chr1:2539614-2542334 REVERSE LENGTH=1305	4.07686	4.46011	4.56578	5.04535	5.31667	-0.383246	0.416578	-0.48892	0.302781	-0.968481	0.0498532	-1.23981	0.0148887	0.329988
AT3G01175.1_at	Protein of unknown function (DUF1666) | chr3:59471-60845 FORWARD LENGTH=1219	4.86472	4.94689	5.21717	5.86308	6.08582	-0.0821732	0.736766	-0.352454	0.160246	-0.99836	0.000592832	-1.2211	7.67968e-05	0.0152763
AT2G25510.1_at	unknown protein; Has 2 Blast hits to 2 proteins in 1 species: Archae - 0; Bacteria - 0; Metazoa - 0; Fungi - 0; Plants - 2; Viruses - 0; Other Eukaryotes - 0 (source: NCBI BLink). | chr2:10856399-10857156 FORWARD LENGTH=571	3.78244	4.53522	4.1043	5.84891	5.00185	-0.752778	0.0734456	-0.321861	0.427169	-2.06647	5.64137e-05	-1.21941	0.00643256	0.222049
AT5G43520.1_at	Cysteine/Histidine-rich C1 domain family protein | chr5:17485439-17486191 REVERSE LENGTH=753	5.60007	5.6219	5.98999	6.44125	6.81685	-0.0218314	0.93074	-0.389926	0.132714	-0.841184	0.00318249	-1.21679	0.000108956	0.0188464
AT1G35625.1_at	RING/U-box superfamily protein | chr1:13158466-13160245 REVERSE LENGTH=974	2.60864	2.7302	2.69719	3.44719	3.81751	-0.121569	0.635404	-0.0885527	0.729433	-0.838557	0.00371225	-1.20887	0.000140678	0.0221223
AT4G31940.1_at	CYP82C4 | cytochrome P450, family 82, subfamily C, polypeptide 4 | chr4:15451988-15454160 FORWARD LENGTH=1821	2.24996	2.82953	2.49701	3.58422	3.45051	-0.579576	0.0730958	-0.247053	0.427946	-1.33426	0.000353249	-1.20055	0.000941821	0.0761095
AT2G03870.1_at	Small nuclear ribonucleoprotein family protein | chr2:1180217-1181437 FORWARD LENGTH=570	1.86855	2.11972	2.19945	2.00221	3.02603	-0.251168	0.425247	-0.330901	0.296604	-0.133663	0.669347	-1.15748	0.00141368	0.0967594
AT2G15370.1_at	FUT5, ATFUT5 | fucosyltransferase 5 | chr2:6698100-6699783 REVERSE LENGTH=1602	4.68591	4.6779	4.9726	5.78932	5.8368	0.00801358	0.961054	-0.286689	0.0932781	-1.10341	2.0807e-06	-1.15089	1.17947e-06	0.000810784
AT1G19250.1_at	FMO1 | flavin-dependent monooxygenase 1 | chr1:6650529-6653078 REVERSE LENGTH=1745	3.69404	4.25407	4.15715	5.25188	4.83595	-0.560023	0.0371489	-0.463107	0.0792007	-1.55783	6.3737e-06	-1.14191	0.00022359	0.0296508
AT1G06500.2_at	unknown protein; FUNCTIONS IN: molecular_function unknown; INVOLVED IN: biological_process unknown; LOCATED IN: cellular_component unknown; EXPRESSED IN: 22 plant structures; EXPRESSED DURING: 13 growth stages; Has 35333 Blast hits to 34131 proteins in 2444 species: Archae - 798; Bacteria - 22429; Metazoa - 974; Fungi - 991; Plants - 531; Viruses - 0; Other Eukaryotes - 9610 (source: NCBI BLink).…	2.36258	2.99947	2.75644	3.09788	3.49529	-0.636891	0.20916	-0.393857	0.431126	-0.735298	0.149952	-1.1327	0.0324419	0.457041
AT2G16005.1_at	MD-2-related lipid recognition domain-containing protein | chr2:6959150-6960197 REVERSE LENGTH=742	7.18529	7.77234	7.34034	8.209	8.31435	-0.587053	0.0155091	-0.155049	0.489613	-1.02371	0.000191065	-1.12906	6.69752e-05	0.014328
AT1G08320.1_at	TGA9, bZIP21 | bZIP transcription factor family protein | chr1:2621904-2627848 REVERSE LENGTH=1829	4.3759	5.0235	5.10251	4.92093	5.50423	-0.6476	0.170952	-0.726611	0.126954	-0.545028	0.245651	-1.12833	0.022958	0.397824
AT5G07790.1_at	unknown protein; BEST Arabidopsis thaliana protein match is: unknown protein (TAIR:AT5G61300.1); Has 1807 Blast hits to 1807 proteins in 277 species: Archae - 0; Bacteria - 0; Metazoa - 736; Fungi - 347; Plants - 385; Viruses - 0; Other Eukaryotes - 339 (source: NCBI BLink). | chr5:2483311-2486361 FORWARD LENGTH=2453	3.41373	4.08096	4.26659	4.47144	4.53146	-0.667229	0.140514	-0.852854	0.0642754	-1.05771	0.0249812	-1.11773	0.0187037	0.36431
AT3G09600.1_at	Homeodomain-like superfamily protein | chr3:2946406-2948995 FORWARD LENGTH=1402	2.39652	2.69679	2.81831	2.65445	3.51156	-0.300271	0.527561	-0.421792	0.377425	-0.257932	0.586818	-1.11504	0.027761	0.433265
AT1G52070.1_at	Mannose-binding lectin superfamily protein | chr1:19364888-19366924 REVERSE LENGTH=1224	4.91863	4.53712	5.18938	5.69291	6.02539	0.381511	0.138314	-0.270747	0.285626	-0.774275	0.0055288	-1.10675	0.000271764	0.0337868
AT1G12030.1_at	Protein of unknown function (DUF506) chr1:4064667-4066341 REVERSE LENGTH=994	5.42615	5.39382	5.58482	6.06538	6.52925	0.0323264	0.861333	-0.158675	0.395824	-0.639235	0.00250256	-1.10311	9.77723e-06	0.00353614
AT5G04150.1_at	BHLH101 | basic helix-loop-helix (bHLH) DNA-binding superfamily protein | chr5:1138559-1139476 REVERSE LENGTH=723	5.50122	5.592	5.70233	5.70637	6.60212	-0.0907831	0.699838	-0.201118	0.396838	-0.205156	0.387617	-1.1009	0.000155383	0.0235494
AT5G62420.1_at	NAD(P)-linked oxidoreductase superfamily protein | chr5:25064835-25066111 FORWARD LENGTH=951	3.9596	4.02189	4.09152	4.81107	5.05603	-0.0622836	0.708052	-0.131912	0.430839	-0.85147	5.81776e-05	-1.09642	2.63502e-06	0.00144595
AT5G26280.2_at	TRAF-like family protein | chr5:9208711-9210572 FORWARD LENGTH=1166	8.50128	8.62011	8.65871	9.46097	9.58013	-0.118832	0.45989	-0.157431	0.330287	-0.959688	8.78756e-06	-1.07885	1.93182e-06	0.00116007
AT4G08850.1_at	Leucine-rich repeat receptor-like protein kinase family protein | chr4:5636489-5640636 REVERSE LENGTH=3482	5.90635	6.05802	6.36338	6.52195	6.98497	-0.151668	0.581644	-0.457031	0.107987	-0.615597	0.035081	-1.07861	0.000843041	0.0704238
AT5G23830.2_at	MD-2-related lipid recognition domain-containing protein | chr5:8033738-8034930 FORWARD LENGTH=768	6.80621	7.35884	7.05168	7.86721	7.87806	-0.552629	0.000830624	-0.24547	0.0926084	-1.061	4.10449e-07	-1.07185	3.55406e-07	0.000421133
AT5G59613.1_at	unknown protein; BEST Arabidopsis thaliana protein match is: unknown protein (TAIR:AT3G46430.1); Has 30201 Blast hits to 17322 proteins in 780 species: Archae - 12; Bacteria - 1396; Metazoa - 17338; Fungi - 3422; Plants - 5037; Viruses - 0; Other Eukaryotes - 2996 (source: NCBI BLink). | chr5:24015474-24016500 REVERSE LENGTH=856	3.30224	3.31737	2.62555	3.38675	4.35672	-0.0151257	0.958068	0.676693	0.0281554	-0.0845028	0.769218	-1.05448	0.00155488	0.101616
AT2G41240.2_at	BHLH100 | basic helix-loop-helix protein 100 | chr2:17198282-17199320 REVERSE LENGTH=775	8.22959	8.39309	8.03235	8.45645	9.28399	-0.163492	0.257068	0.197244	0.174927	-0.226855	0.121665	-1.0544	5.18413e-07	0.000514621
AT3G13100.1_at	ATMRP7, MRP7, ABCC7 | multidrug resistance-associated protein 7 | chr3:4208735-4214173 REVERSE LENGTH=4606	3.47688	3.91512	3.54181	3.8296	4.51883	-0.438232	0.0448577	-0.0649241	0.753246	-0.352718	0.0998435	-1.04194	6.89376e-05	0.0143404
AT1G02900.1_at	RALFL1, RALF1, ATRALF1 | rapid alkalinization factor 1 | chr1:653765-654343 REVERSE LENGTH=579	5.73612	5.94395	6.03212	6.66026	6.77669	-0.207828	0.333371	-0.295995	0.173851	-0.924133	0.000323261	-1.04056	9.47593e-05	0.0173328
AT1G04300.2_at	TRAF-like superfamily protein | chr1:1148659-1154652 REVERSE LENGTH=3783	4.77511	5.26108	5.09356	5.74272	5.81444	-0.485974	0.147145	-0.318451	0.334094	-0.967616	0.0073716	-1.03933	0.00450985	0.188485
AT4G20440.1_at	smB | small nuclear ribonucleoprotein associated protein B | chr4:11022142-11023752 REVERSE LENGTH=1611	3.14479	3.73014	3.70185	3.00726	4.18377	-0.585347	0.153437	-0.557057	0.173181	0.137528	0.73036	-1.03898	0.0163869	0.343347
AT3G06760.1_at	Drought-responsive family protein | chr3:2132837-2134556 FORWARD LENGTH=1010	4.71287	5.35485	5.34374	5.4087	5.73021	-0.641983	0.10516	-0.630877	0.110885	-0.695832	0.0808789	-1.01734	0.0144834	0.325722
AT3G28345.1_at	ABC transporter family protein | chr3:10593753-10598775 REVERSE LENGTH=3891	6.62357	7.04398	6.80402	7.31028	7.62264	-0.42041	0.0197321	-0.180451	0.286892	-0.686709	0.000556678	-0.999072	9.22039e-06	0.00337978
AT1G77460.1_at	Armadillo/beta-catenin-like repeat ; C2 calcium/lipid-binding domain (CaLB) protein | chr1:29103763-29111921 FORWARD LENGTH=7084	4.05611	4.16616	4.59493	4.57773	5.05343	-0.110046	0.813695	-0.538817	0.256805	-0.521616	0.27177	-0.997323	0.0437383	0.50768
AT3G06435.1_at	Expressed protein | chr3:1969121-1970784 REVERSE LENGTH=1664	4.1926	4.54373	4.65106	5.20628	5.18839	-0.351134	0.12851	-0.45846	0.0520093	-1.01368	0.000217699	-0.995798	0.000260545	0.032827
AT3G19430.1_at	late embryogenesis abundant protein-related / LEA protein-related | chr3:6736184-6738330 REVERSE LENGTH=1878	4.77343	4.85761	5.05544	5.86979	5.76497	-0.0841869	0.69366	-0.282011	0.19653	-1.09637	5.67443e-05	-0.991544	0.000168292	0.0244576
AT3G48090.1_at	EDS1, ATEDS1 | alpha/beta-Hydrolases superfamily protein | chr3:17755374-17757780 REVERSE LENGTH=2139	3.68556	3.55	4.34622	4.85197	4.67708	0.135559	0.759821	-0.660665	0.147567	-1.16641	0.0154989	-0.99152	0.0355812	0.471655
AT3G15500.1_at	ATNAC3, ANAC055, NAC055, NAC3 | NAC domain containing protein 3 | chr3:5234617-5236088 FORWARD LENGTH=1274	2.80476	3.21803	3.38971	3.48498	3.79315	-0.413265	0.0942219	-0.584953	0.0222244	-0.680214	0.00934048	-0.98839	0.000500375	0.049923
AT3G03790.2_at	ankyrin repeat family protein / regulator of chromosome condensation (RCC1) family protein | chr3:961997-968149 FORWARD LENGTH=4032	1.84482	1.65533	2.11164	2.48578	2.82975	0.189487	0.689852	-0.266825	0.575	-0.640961	0.186864	-0.984931	0.0491804	0.525027
AT3G07740.3_at	ADA2A, ATADA2A, HAC10, HXA02, HXA2 | homolog of yeast ADA2 2A | chr3:2469783-2472636 REVERSE LENGTH=1816	2.60506	2.65461	2.51567	2.87767	3.58336	-0.0495572	0.914425	0.0893828	0.846376	-0.272614	0.556295	-0.978302	0.0451461	0.511185
AT5G60660.1_at	PIP2F, PIP2;4 | plasma membrane intrinsic protein 2;4 | chr5:24375457-24376989 REVERSE LENGTH=1142	6.77407	6.84462	6.7042	7.72082	7.7388	-0.0705499	0.630164	0.0698704	0.633442	-0.946747	3.36997e-06	-0.964724	2.6323e-06	0.00144595
AT2G20080.1_at	unknown protein; FUNCTIONS IN: molecular_function unknown; INVOLVED IN: biological_process unknown; LOCATED IN: chloroplast; BEST Arabidopsis thaliana protein match is: unknown protein (TAIR:AT4G28840.1); Has 35333 Blast hits to 34131 proteins in 2444 species: Archae - 798; Bacteria - 22429; Metazoa - 974; Fungi - 991; Plants - 531; Viruses - 0; Other Eukaryotes - 9610 (source: NCBI BLink). | chr…	4.68672	4.52598	4.48656	5.32694	5.64	0.160741	0.585982	0.20016	0.498597	-0.640211	0.0402601	-0.953278	0.00403583	0.178649
AT3G53150.1_at	UGT73D1 | UDP-glucosyl transferase 73D1 | chr3:19697736-19699259 REVERSE LENGTH=1524	4.70018	4.94461	4.95749	5.44666	5.64338	-0.244427	0.113076	-0.25731	0.0965124	-0.746483	7.48132e-05	-0.943195	4.53125e-06	0.00212082
AT5G58010.1_at	LRL3 | LJRHL1-like 3 | chr5:23483545-23484889 REVERSE LENGTH=1019	5.48273	5.87166	5.53687	6.27818	6.42356	-0.38893	0.0116269	-0.0541478	0.700705	-0.795455	1.8586e-05	-0.940839	2.21433e-06	0.00125849
AT5G03570.2_at	IREG2 | iron regulated 2 | chr5:903756-906664 FORWARD LENGTH=1789	3.50648	3.66258	3.35287	3.75434	4.44681	-0.156096	0.386444	0.153606	0.393911	-0.247858	0.175674	-0.940329	4.25655e-05	0.010421
AT2G42980.1_at	Eukaryotic aspartyl protease family protein | chr2:17875005-17876588 REVERSE LENGTH=1584	4.82432	4.79068	4.6885	5.30443	5.76303	0.0336353	0.886315	0.135814	0.565445	-0.480118	0.0529886	-0.938717	0.00074238	0.0645566
AT5G18400.1_at	Cytokine-induced anti-apoptosis inhibitor 1, Fe-S biogenesis | chr5:6092682-6094987 REVERSE LENGTH=1294	3.33556	3.55642	4.01078	3.60069	4.27225	-0.220868	0.593922	-0.675222	0.114226	-0.265136	0.522885	-0.936697	0.0333768	0.461663
AT5G42590.1_at	CYP71A16 | cytochrome P450, family 71, subfamily A, polypeptide 16 | chr5:17031111-17033726 REVERSE LENGTH=1686	4.86851	5.13522	4.9237	5.63543	5.80011	-0.266705	0.0898019	-0.0551893	0.715082	-0.766918	6.45354e-05	-0.931603	6.32488e-06	0.00275756
AT3G01290.1_at	SPFH/Band 7/PHB domain-containing membrane-associated protein family | chr3:88054-89422 REVERSE LENGTH=1122	8.02047	8.46843	8.50069	8.7512	8.94722	-0.447957	0.00858557	-0.480216	0.00539632	-0.730734	0.000137947	-0.92675	8.8778e-06	0.00334386
AT5G17530.2_at	phosphoglucosamine mutase family protein | chr5:5777603-5782148 FORWARD LENGTH=2209	5.57312	5.83913	5.91055	6.26527	6.49775	-0.266006	0.381411	-0.337429	0.269922	-0.692149	0.0312394	-0.924631	0.00587951	0.212401
AT5G17340.1_at	Putative membrane lipoprotein | chr5:5715624-5716268 REVERSE LENGTH=645	2.86095	2.93272	2.81528	4.19203	3.78175	-0.0717748	0.809839	0.0456706	0.878248	-1.33108	0.000253681	-0.920801	0.00569816	0.209633
AT4G02330.1_at	ATPMEPCRB | Plant invertase/pectin methylesterase inhibitor superfamily | chr4:1032413-1035037 FORWARD LENGTH=1897	4.96651	5.02068	4.8694	5.73333	5.88419	-0.0541704	0.836051	0.0971134	0.711002	-0.766816	0.00809919	-0.917672	0.00222333	0.126813
AT2G45770.1_at	CPFTSY, FRD4 | signal recognition particle receptor protein, chloroplast (FTSY) | chr2:18851218-18853709 FORWARD LENGTH=1438	5.33618	5.37266	5.93022	5.47757	6.25302	-0.0364742	0.910436	-0.594038	0.079463	-0.141386	0.663592	-0.916841	0.0101633	0.28055
AT1G21120.1_at	O-methyltransferase family protein | chr1:7395228-7396773 REVERSE LENGTH=1358	4.31234	3.88792	4.17466	5.19521	5.2284	0.424425	0.0974225	0.13768	0.577754	-0.882873	0.00186597	-0.916063	0.0013743	0.0953443
AT4G14130.1_at	XTR7, XTH15 | xyloglucan endotransglucosylase/hydrolase 15 | chr4:8137051-8138281 REVERSE LENGTH=1065	6.25423	5.87817	6.34525	6.84933	7.16716	0.376058	0.00904336	-0.0910124	0.488553	-0.595097	0.000205806	-0.912932	1.22279e-06	0.000810784
AT2G35980.1_at	YLS9, NHL10, ATNHL10 | Late embryogenesis abundant (LEA) hydroxyproline-rich glycoprotein family | chr2:15110588-15111471 FORWARD LENGTH=884	6.24704	6.40281	6.38591	6.70812	7.15934	-0.155768	0.418285	-0.138865	0.469727	-0.461079	0.024539	-0.912302	0.00012454	0.0207525
AT1G78000.2_at	SULTR1;2, SEL1 | sulfate transporter 1;2 | chr1:29329844-29333146 FORWARD LENGTH=2276	8.37071	8.71377	8.37115	9.0962	9.277	-0.343063	0.0149963	-0.000441991	0.997277	-0.725494	2.09292e-05	-0.906288	1.21308e-06	0.000810784
AT2G22570.1_at	ATNIC1, NIC1 | nicotinamidase 1 | chr2:9589435-9590879 REVERSE LENGTH=937	1.89445	1.99647	2.31602	1.8399	2.79949	-0.102017	0.766849	-0.42157	0.229384	0.0545507	0.873917	-0.905039	0.0155097	0.335177
AT4G33000.2_at	CBL10, SCABP8, ATCBL10 | calcineurin B-like protein 10 | chr4:15924756-15926628 FORWARD LENGTH=1036	3.9063	4.45879	4.58715	4.21826	4.80768	-0.552487	0.194674	-0.680852	0.114179	-0.311958	0.456821	-0.901379	0.0412168	0.497434
AT5G11920.1_at	AtcwINV6, cwINV6 | 6-&1-fructan exohydrolase | chr5:3839391-3842371 FORWARD LENGTH=1917	3.73657	3.77255	3.83241	4.15893	4.63349	-0.0359749	0.931443	-0.0958345	0.818844	-0.422359	0.31921	-0.896915	0.0430671	0.504389
AT2G41100.4_at	TCH3 | Calcium-binding EF hand family protein | chr2:17137829-17139607 FORWARD LENGTH=1252	7.71603	7.4454	8.04814	8.32161	8.61229	0.270625	0.26831	-0.332118	0.177938	-0.605589	0.0197672	-0.896261	0.00134329	0.0945859
AT1G63260.1_at	TET10 | tetraspanin10 | chr1:23466800-23469204 REVERSE LENGTH=1419	2.29959	2.28084	2.36377	2.64102	3.1851	0.0187473	0.941366	-0.0641852	0.801334	-0.341439	0.190987	-0.885511	0.00239797	0.13366
AT1G75080.1_at	BZR1 | Brassinosteroid signalling positive regulator (BZR1) family protein | chr1:28185504-28187410 FORWARD LENGTH=1563	4.46393	4.99203	4.69994	4.60705	5.34637	-0.528101	0.102788	-0.236013	0.452498	-0.143121	0.647058	-0.88244	0.0100914	0.27953
AT1G52050.1_at	Mannose-binding lectin superfamily protein | chr1:19354919-19356764 REVERSE LENGTH=1145	3.97994	3.83077	3.87158	4.30303	4.86051	0.149176	0.538921	0.108364	0.654545	-0.323089	0.19157	-0.880567	0.00162456	0.104419
AT4G24800.2_at	MA3 domain-containing protein | chr4:12781762-12785197 FORWARD LENGTH=2728	3.61924	4.22285	4.08323	4.35018	4.4989	-0.603611	0.12793	-0.463986	0.23581	-0.730944	0.0691481	-0.879661	0.0318619	0.454944
AT2G47140.1_at	NAD(P)-binding Rossmann-fold superfamily protein | chr2:19350740-19352088 REVERSE LENGTH=1033	3.58485	3.75825	3.76198	4.16606	4.45945	-0.173396	0.259139	-0.177128	0.249388	-0.581203	0.00102064	-0.874599	1.39134e-05	0.00447295
AT4G37070.4_at	PLP1, PLA IVA, AtPLAIVA | Acyl transferase/acyl hydrolase/lysophospholipase superfamily protein | chr4:17465085-17467109 REVERSE LENGTH=1252	5.26854	5.57209	5.49568	5.51548	6.14219	-0.303555	0.202074	-0.227143	0.335012	-0.246945	0.29571	-0.873651	0.00126361	0.0908114
AT4G15380.1_at	CYP705A4 | cytochrome P450, family 705, subfamily A, polypeptide 4 | chr4:8788739-8790444 FORWARD LENGTH=1630	2.67458	2.99745	3.07653	3.32392	3.54773	-0.322876	0.22927	-0.401958	0.138656	-0.649343	0.0220983	-0.873151	0.00341171	0.16304
AT2G46880.2_at	ATPAP14, PAP14 | purple acid phosphatase 14 | chr2:19264694-19266446 REVERSE LENGTH=1528	4.31624	4.09193	4.21033	5.74852	5.18223	0.224309	0.208847	0.105907	0.546061	-1.43228	1.28331e-07	-0.865987	8.41421e-05	0.0159404
AT3G56980.1_at	BHLH039, ORG3 | basic helix-loop-helix (bHLH) DNA-binding superfamily protein | chr3:21086546-21087494 REVERSE LENGTH=843	5.4453	5.41288	5.19116	5.68236	6.30851	0.0324237	0.844427	0.254145	0.135919	-0.237054	0.162611	-0.86321	4.70092e-05	0.0110827
AT1G47395.1_at	unknown protein; FUNCTIONS IN: molecular_function unknown; INVOLVED IN: biological_process unknown; LOCATED IN: endomembrane system; BEST Arabidopsis thaliana protein match is: unknown protein (TAIR:AT1G47400.1); Has 9 Blast hits to 9 proteins in 2 species: Archae - 0; Bacteria - 0; Metazoa - 0; Fungi - 0; Plants - 9; Viruses - 0; Other Eukaryotes - 0 (source: NCBI BLink). | chr1:17383034-1738340…	8.59047	8.21948	8.34101	9.0136	9.45304	0.370988	0.0213219	0.249461	0.107333	-0.42313	0.0100345	-0.862565	1.44534e-05	0.00460008
AT1G23110.5_at	unknown protein; FUNCTIONS IN: molecular_function unknown; LOCATED IN: chloroplast; BEST Arabidopsis thaliana protein match is: unknown protein (TAIR:AT1G70900.1). | chr1:8196554-8198331 REVERSE LENGTH=1144	5.37273	4.58813	5.28085	6.63655	6.23449	0.784605	0.00358513	0.0918862	0.700064	-1.26382	3.92917e-05	-0.861759	0.00172262	0.108566
AT1G51840.1_at	protein kinase-related | chr1:19249449-19250709 REVERSE LENGTH=659	5.77803	6.04719	5.57593	6.36435	6.63769	-0.26916	0.165515	0.2021	0.292163	-0.586322	0.00551448	-0.859659	0.000209504	0.0281079
AT3G04400.1_at	emb2171 | Ribosomal protein L14p/L23e family protein | chr3:1167276-1168659 FORWARD LENGTH=837	4.06932	4.44719	4.06557	4.35258	4.92546	-0.377869	0.136885	0.00374313	0.987869	-0.283266	0.258444	-0.856143	0.00238046	0.132917
AT4G21830.1_at	ATMSRB7, MSRB7 | methionine sulfoxide reductase B7 | chr4:11584346-11585419 REVERSE LENGTH=817	6.76033	7.05508	7.02871	7.7308	7.60932	-0.294751	0.124177	-0.268381	0.159243	-0.970464	4.62172e-05	-0.848987	0.000196692	0.0269833
AT3G09220.1_at	LAC7 | laccase 7 | chr3:2827239-2830542 REVERSE LENGTH=1964	8.96473	9.25029	9.21842	9.61119	9.80599	-0.28556	0.0367797	-0.253689	0.060407	-0.646464	7.2023e-05	-0.841268	2.95126e-06	0.001515
AT5G54370.1_at	Late embryogenesis abundant (LEA) protein-related | chr5:22075283-22076777 FORWARD LENGTH=1275	7.06776	6.88985	7.03308	7.91649	7.90484	0.177912	0.317834	0.0346822	0.843528	-0.848731	0.000111831	-0.837084	0.000129582	0.02108
AT1G21910.1_at	DREB26 | Integrase-type DNA-binding superfamily protein | chr1:7696536-7697699 FORWARD LENGTH=1164	5.61076	5.71639	5.93026	6.51934	6.44513	-0.105627	0.645134	-0.319501	0.173516	-0.908581	0.000773321	-0.834363	0.00161586	0.104105
AT2G38390.1_at	Peroxidase superfamily protein | chr2:16079681-16081509 FORWARD LENGTH=1223	5.78263	6.10539	6.06221	6.60757	6.61649	-0.322755	0.0282971	-0.279583	0.0535937	-0.824942	8.93818e-06	-0.833856	7.81148e-06	0.0031077
AT1G51920.1_at	unknown protein; FUNCTIONS IN: molecular_function unknown; INVOLVED IN: biological_process unknown; LOCATED IN: endomembrane system; EXPRESSED IN: stem, stamen; EXPRESSED DURING: 4 anthesis; Has 22 Blast hits to 22 proteins in 5 species: Archae - 0; Bacteria - 0; Metazoa - 0; Fungi - 0; Plants - 22; Viruses - 0; Other Eukaryotes - 0 (source: NCBI BLink). | chr1:19294229-19294579 FORWARD LENGTH=237	4.95683	5.121	5.05513	5.44629	5.78772	-0.164173	0.448819	-0.0982968	0.648519	-0.489465	0.0329535	-0.830888	0.00099041	0.0790854
AT1G77080.3_at	MAF1, FLM, AGL27 | K-box region and MADS-box transcription factor family protein chr1:28958311-28959054 FORWARD LENGTH=426	2.66187	3.1756	2.99722	3.02628	3.49045	-0.513731	0.208063	-0.335351	0.405263	-0.36441	0.366626	-0.828576	0.0494169	0.526369
AT2G44480.2_at	BGLU17 | beta glucosidase 17 | chr2:18359734-18363088 FORWARD LENGTH=1893	4.24589	4.49763	4.31907	4.65292	5.07118	-0.251741	0.155504	-0.073178	0.67172	-0.407034	0.0275276	-0.825289	0.000122607	0.0205379
AT1G73330.1_at	ATDR4, DR4 | drought-repressed 4 | chr1:27568718-27569717 REVERSE LENGTH=1000	9.05245	9.13314	9.2072	9.74677	9.87531	-0.0806852	0.428236	-0.154747	0.137377	-0.694313	1.5362e-06	-0.822861	1.41535e-07	0.000225231
AT3G30520.1_at	unknown protein; BEST Arabidopsis thaliana protein match is: unknown protein (TAIR:AT3G42870.1); Has 70 Blast hits to 70 proteins in 9 species: Archae - 0; Bacteria - 8; Metazoa - 5; Fungi - 0; Plants - 57; Viruses - 0; Other Eukaryotes - 0 (source: NCBI BLink). | chr3:12130340-12132173 FORWARD LENGTH=1194	3.27934	3.33483	3.74284	3.58313	4.09031	-0.0554897	0.866902	-0.463502	0.172559	-0.303787	0.364252	-0.810966	0.0229287	0.397824
AT2G01830.3_at	WOL, CRE1, WOL1, AHK4, ATCRE1 | CHASE domain containing histidine kinase protein | chr2:362983-369707 REVERSE LENGTH=3654	6.87411	6.969	7.03571	7.56672	7.68166	-0.0948927	0.480493	-0.1616	0.235587	-0.692613	5.14557e-05	-0.807553	8.22708e-06	0.00315474
AT1G19020.1_at	unknown protein; BEST Arabidopsis thaliana protein match is: unknown protein (TAIR:AT3G48180.1); Has 88 Blast hits to 88 proteins in 15 species: Archae - 0; Bacteria - 0; Metazoa - 0; Fungi - 0; Plants - 88; Viruses - 0; Other Eukaryotes - 0 (source: NCBI BLink). | chr1:6568073-6568597 FORWARD LENGTH=525	4.87484	4.8178	5.07517	5.36816	5.68126	0.0570442	0.688161	-0.200326	0.169041	-0.493314	0.00237513	-0.806412	1.75003e-05	0.00535561
AT3G44860.1_at	FAMT | farnesoic acid carboxyl-O-methyltransferase | chr3:16379633-16381070 FORWARD LENGTH=1234	3.59937	3.9225	3.86847	4.85897	4.40551	-0.323128	0.375464	-0.269104	0.458946	-1.2596	0.00229784	-0.806137	0.0358234	0.473092
AT3G45650.1_at	NAXT1 | nitrate excretion transporter1 | chr3:16759253-16761266 FORWARD LENGTH=1677	7.53502	7.84356	7.81966	8.25503	8.33564	-0.308542	0.0304346	-0.284637	0.0439051	-0.720007	3.21819e-05	-0.800619	8.93041e-06	0.00334386
AT3G20940.1_at	CYP705A30 | cytochrome P450, family 705, subfamily A, polypeptide 30 | chr3:7339717-7341655 FORWARD LENGTH=1724	3.42864	3.76004	3.61312	3.766	4.2273	-0.331404	0.254971	-0.184477	0.5211	-0.337362	0.246832	-0.798663	0.0109489	0.289741
AT5G20410.1_at	MGD2, ATMGD2 | monogalactosyldiacylglycerol synthase 2 | chr5:6896576-6898783 FORWARD LENGTH=1798	4.7848	4.6888	4.81942	5.58281	5.58338	0.0959945	0.623208	-0.0346215	0.858943	-0.79801	0.000582479	-0.798582	0.00057861	0.0560431
AT1G58320.1_at	PLAC8 family protein | chr1:21634123-21635303 REVERSE LENGTH=447	6.60791	6.84166	6.88668	7.40592	7.40616	-0.233751	0.326244	-0.278778	0.244296	-0.798013	0.00285461	-0.798254	0.00284802	0.146177
AT1G68620.1_at	alpha/beta-Hydrolases superfamily protein | chr1:25765947-25767240 FORWARD LENGTH=1294	4.19464	4.0931	4.3475	4.62263	4.99124	0.101535	0.537118	-0.152856	0.356024	-0.427992	0.0161266	-0.796596	0.000103447	0.0183933
AT5G06420.1_at	Zinc finger (CCCH-type/C3HC4-type RING finger) family protein | chr5:1961411-1963038 FORWARD LENGTH=1415	2.31475	2.52693	2.53495	2.74622	3.11119	-0.212175	0.552319	-0.220195	0.537553	-0.431467	0.233873	-0.796437	0.0353736	0.471184
AT5G23840.2_at	MD-2-related lipid recognition domain-containing protein | chr5:8035767-8036982 FORWARD LENGTH=906	3.21622	3.20919	3.21082	3.94106	4.00868	0.00703364	0.964671	0.00540651	0.97284	-0.724833	0.000203407	-0.792453	7.89373e-05	0.0155372
AT2G31110.1_at	TBL40 | Plant protein of unknown function (DUF828) | chr2:13258329-13259552 REVERSE LENGTH=933	2.51139	2.82732	3.06239	2.42632	3.30277	-0.315931	0.396551	-0.551001	0.147118	0.0850714	0.81775	-0.791372	0.0430526	0.504389
AT4G15417.1_at	ATRTL1, RTL1 | RNAse II-like 1 | chr4:8821717-8823076 FORWARD LENGTH=922	4.12001	4.4129	4.16708	4.59259	4.91107	-0.29289	0.0916653	-0.0470702	0.777982	-0.472587	0.0100334	-0.791063	0.000136346	0.0218064
AT3G47040.2_at	Glycosyl hydrolase family protein | chr3:17324162-17327152 REVERSE LENGTH=2051	3.9446	4.40513	3.85817	4.55678	4.73488	-0.460526	0.0107789	0.086426	0.600503	-0.612179	0.00136287	-0.790284	0.000118446	0.0199459
AT5G44400.1_at	FAD-binding Berberine family protein | chr5:17886194-17888480 REVERSE LENGTH=1930	6.76347	7.24687	6.87405	7.2163	7.55296	-0.483408	0.00449252	-0.110582	0.468034	-0.452835	0.00705194	-0.789491	4.77968e-05	0.0111855
AT5G20790.1_at	unknown protein; FUNCTIONS IN: molecular_function unknown; INVOLVED IN: biological_process unknown; LOCATED IN: endomembrane system; EXPRESSED IN: 11 plant structures; EXPRESSED DURING: LP.04 four leaves visible, 4 anthesis, petal differentiation and expansion stage; BEST Arabidopsis thaliana protein match is: unknown protein (TAIR:AT3G43110.1); Has 30201 Blast hits to 17322 proteins in 780 speci…	3.26339	3.08969	3.61087	4.31845	4.05263	0.173704	0.465693	-0.347476	0.153191	-1.05506	0.000254828	-0.789242	0.0032528	0.159272
AT2G33790.1_at	ATAGP30, AGP30 | arabinogalactan protein 30 | chr2:14293561-14295271 REVERSE LENGTH=1055	7.2497	7.16524	7.22538	8.13568	8.03857	0.0844649	0.559225	0.0243219	0.865873	-0.885975	6.56822e-06	-0.788869	2.71752e-05	0.00751301
AT5G55930.1_at	ATOPT1, OPT1 | oligopeptide transporter 1 | chr5:22652715-22656106 FORWARD LENGTH=2820	5.15159	5.03475	5.33059	5.85759	5.94005	0.116843	0.590674	-0.178997	0.412479	-0.706004	0.0038628	-0.788459	0.00163205	0.104514
AT1G65390.2_at	ATPP2-A5, PP2-A5 | phloem protein 2 A5 | chr1:24292490-24294612 FORWARD LENGTH=1350	3.844	3.75166	3.87402	4.98034	4.632	0.0923461	0.489593	-0.0300182	0.821235	-1.13634	6.89653e-08	-0.787996	1.03555e-05	0.00362182
AT5G15290.1_at	Uncharacterised protein family (UPF0497) | chr5:4967011-4968035 FORWARD LENGTH=836	5.06195	5.1993	5.13131	5.33948	5.84796	-0.137346	0.421536	-0.069359	0.6828	-0.277522	0.113719	-0.786006	0.000171148	0.0245072
AT1G53940.1_at	GLIP2 | GDSL-motif lipase 2 | chr1:20143279-20145780 FORWARD LENGTH=1311	4.84569	4.96233	5.20279	5.77912	5.63161	-0.116641	0.693498	-0.357105	0.235836	-0.933434	0.00485971	-0.785923	0.0146104	0.326319
AT1G24320.1_at	Six-hairpin glycosidases superfamily protein | chr1:8626315-8630971 REVERSE LENGTH=2528	4.38474	4.6912	4.49244	4.97914	5.16971	-0.306458	0.0916037	-0.107702	0.539137	-0.594398	0.00279138	-0.784971	0.000235304	0.0305674
AT5G23000.1_at	RAX1, MYB37, ATMYB37 | myb domain protein 37 | chr5:7696135-7697927 FORWARD LENGTH=1304	2.76114	2.81999	2.79867	3.32557	3.54591	-0.0588468	0.747504	-0.0375313	0.837182	-0.564426	0.00566412	-0.784768	0.000369384	0.0406795
AT4G08895.1_at	inorganic phosphate transporter family protein | chr4:5697896-5698615 FORWARD LENGTH=468	2.87537	3.34929	3.18022	3.3077	3.65933	-0.473918	0.0306549	-0.304851	0.148872	-0.432325	0.0463513	-0.78396	0.00108637	0.083719
AT4G11655.1_at	Uncharacterised protein family (UPF0497) | chr4:7038585-7039923 FORWARD LENGTH=796	2.92091	3.03567	2.66372	3.30354	3.70445	-0.114759	0.439528	0.257189	0.0932752	-0.382627	0.0167065	-0.783538	3.82272e-05	0.00950513
AT1G52060.1_at	Mannose-binding lectin superfamily protein | chr1:19359039-19360675 REVERSE LENGTH=969	7.09351	6.12138	6.56266	7.82983	7.875	0.972137	0.000159499	0.530851	0.0184782	-0.736319	0.00206866	-0.781483	0.001264	0.0908114
AT5G39120.1_at	RmlC-like cupins superfamily protein | chr5:15662705-15663486 REVERSE LENGTH=666	3.70371	3.73216	3.6103	3.65889	4.48071	-0.0284466	0.926371	0.0934091	0.761817	0.0448226	0.884249	-0.776998	0.0195942	0.371312
AT3G23190.1_at	HR-like lesion-inducing protein-related | chr3:8279289-8280912 FORWARD LENGTH=1056	4.76947	4.75095	4.84526	5.69241	5.54198	0.0185126	0.882902	-0.0757942	0.54839	-0.92294	6.23492e-07	-0.772518	6.6621e-06	0.00286533
AT3G02040.1_at	SRG3 | senescence-related gene 3 | chr3:348167-350010 REVERSE LENGTH=1525	7.24771	6.84586	7.23697	7.88318	8.02019	0.401847	0.00620656	0.0107353	0.935039	-0.635476	0.000113761	-0.772486	1.19956e-05	0.00406154
AT1G76240.1_at	Arabidopsis protein of unknown function (DUF241) | chr1:28602811-28603929 REVERSE LENGTH=1119	4.28782	4.13223	4.30307	5.05459	5.05779	0.155591	0.267145	-0.0152466	0.911912	-0.766761	2.27014e-05	-0.769963	2.16019e-05	0.00630756
AT4G37160.1_at	sks15 | SKU5 similar 15 | chr4:17494705-17497124 REVERSE LENGTH=1741	6.20144	5.95676	6.15534	7.06215	6.97121	0.244679	0.356279	0.0460952	0.860445	-0.860708	0.00368452	-0.769774	0.0079931	0.24892
AT1G21250.1_at	WAK1, PRO25 | cell wall-associated kinase | chr1:7439266-7442113 FORWARD LENGTH=2675	3.72524	3.96587	4.12214	4.60095	4.49451	-0.240632	0.459637	-0.396907	0.228531	-0.875713	0.0130979	-0.769272	0.026456	0.424074
AT2G23630.1_at	sks16 | SKU5 similar 16 | chr2:10052566-10055317 REVERSE LENGTH=1647	5.23424	5.09365	5.28902	5.86965	6.00034	0.140583	0.454654	-0.0547813	0.769295	-0.635414	0.00279896	-0.766106	0.000571376	0.0556122
AT3G09922.1_at	IPS1, ATIPS1 | induced by phosphate starvation1 | chr3:3050989-3051530 FORWARD LENGTH=542	3.50848	3.41838	3.5712	4.66037	4.27319	0.0901058	0.739687	-0.0627218	0.816947	-1.15188	0.000409161	-0.764707	0.0102488	0.281877
AT1G14240.2_at	GDA1/CD39 nucleoside phosphatase family protein | chr1:4864902-4867998 FORWARD LENGTH=1745	2.76766	2.61151	3.28852	3.20801	3.53205	0.156151	0.648082	-0.520857	0.138824	-0.440345	0.206904	-0.764387	0.0354494	0.471184
AT5G57625.1_at	CAP (Cysteine-rich secretory proteins, Antigen 5, and Pathogenesis-related 1 protein) superfamily protein | chr5:23337850-23338807 FORWARD LENGTH=869	6.59536	7.08748	6.61982	7.31821	7.35701	-0.492116	0.0157529	-0.0244643	0.896144	-0.722846	0.00100501	-0.76165	0.0006281	0.0586233
AT1G03200.1_at	unknown protein; BEST Arabidopsis thaliana protein match is: unknown protein (TAIR:AT1G03240.1); Has 2 Blast hits to 2 proteins in 1 species: Archae - 0; Bacteria - 0; Metazoa - 0; Fungi - 0; Plants - 2; Viruses - 0; Other Eukaryotes - 0 (source: NCBI BLink). | chr1:780602-781285 FORWARD LENGTH=440	3.85007	3.84239	4.17081	3.91172	4.61019	0.00768422	0.978117	-0.320736	0.260735	-0.0616499	0.825931	-0.760121	0.0130522	0.310937
AT4G36080.1_at	phosphotransferases, alcohol group as acceptor;binding;inositol or phosphatidylinositol kinases | chr4:17059824-17077982 REVERSE LENGTH=12031	6.78956	7.38288	7.25081	7.44045	7.54863	-0.593315	0.0330403	-0.461253	0.0895787	-0.650887	0.0208222	-0.759065	0.00847505	0.254776
AT5G10770.1_at	Eukaryotic aspartyl protease family protein | chr5:3403110-3405448 REVERSE LENGTH=1763	5.4873	5.90461	5.73914	6.07812	6.24504	-0.41731	0.00597405	-0.251841	0.076591	-0.590817	0.000333947	-0.757743	2.23599e-05	0.0064502
AT1G52730.1_at	Transducin/WD40 repeat-like superfamily protein | chr1:19642529-19645134 FORWARD LENGTH=1525	6.25987	6.62925	6.96628	6.88071	7.01532	-0.369382	0.312815	-0.706418	0.062385	-0.620847	0.0978745	-0.755456	0.0477037	0.518938
AT2G35930.1_at	PUB23 | plant U-box 23 | chr2:15082855-15084473 REVERSE LENGTH=1619	8.20469	8.34098	8.32471	8.9333	8.95749	-0.136295	0.339379	-0.120023	0.398822	-0.728609	5.28346e-05	-0.752805	3.63678e-05	0.00918633
AT1G17147.1_at	VQ motif-containing protein | chr1:5863431-5864009 REVERSE LENGTH=579	4.78638	4.65572	5.06349	5.1675	5.53583	0.130658	0.543178	-0.277105	0.205116	-0.381119	0.0872502	-0.749451	0.0022342	0.127149
AT5G48490.1_at	Bifunctional inhibitor/lipid-transfer protein/seed storage 2S albumin superfamily protein | chr5:19647835-19648281 REVERSE LENGTH=447	5.23709	5.49586	5.46279	6.00995	5.98557	-0.25877	0.0541625	-0.2257	0.0892266	-0.772862	7.93288e-06	-0.74848	1.18222e-05	0.00404587
AT1G19530.1_at	unknown protein; FUNCTIONS IN: molecular_function unknown; INVOLVED IN: N-terminal protein myristoylation, anaerobic respiration; LOCATED IN: cellular_component unknown; EXPRESSED IN: leaf apex, inflorescence meristem, hypocotyl, root, flower; EXPRESSED DURING: petal differentiation and expansion stage; Has 47 Blast hits to 47 proteins in 13 species: Archae - 0; Bacteria - 0; Metazoa - 0; Fungi -…	4.47157	4.61703	4.66342	4.79974	5.21727	-0.145465	0.264348	-0.191856	0.145942	-0.328168	0.0180564	-0.7457	1.31056e-05	0.00430011
AT5G57190.1_at	PSD2 | phosphatidylserine decarboxylase 2 | chr5:23171531-23175364 REVERSE LENGTH=1908	3.30911	3.42829	3.1915	3.88354	4.05449	-0.11918	0.417057	0.117609	0.423113	-0.574426	0.000819059	-0.745378	5.90289e-05	0.0130466
AT5G06800.2_at	myb-like HTH transcriptional regulator family protein | chr5:2103160-2105213 FORWARD LENGTH=1150	5.05016	4.99122	5.2434	5.41396	5.7928	0.0589475	0.698493	-0.193241	0.213166	-0.363797	0.0257225	-0.742635	9.84839e-05	0.0179111
AT4G23200.1_at	CRK12 | cysteine-rich RLK (RECEPTOR-like protein kinase) 12 | chr4:12145380-12147934 REVERSE LENGTH=1947	3.33526	3.3419	3.35121	4.05238	4.07737	-0.00664197	0.974381	-0.0159517	0.938526	-0.717116	0.00243702	-0.742111	0.0018534	0.113877
AT2G26440.1_at	Plant invertase/pectin methylesterase inhibitor superfamily | chr2:11247383-11249493 FORWARD LENGTH=1754	5.05899	5.09961	5.39109	5.67797	5.79956	-0.0406238	0.827986	-0.332101	0.0881192	-0.618981	0.00345349	-0.74057	0.000790197	0.0669531
AT5G11920.2_at	AtcwINV6, cwINV6 | 6-&1-fructan exohydrolase | chr5:3839391-3842371 FORWARD LENGTH=1681	3.45747	3.54979	3.29175	3.90248	4.19746	-0.0923167	0.349856	0.165715	0.101932	-0.445006	0.00020446	-0.739988	3.9628e-07	0.000434911
AT5G64000.1_at	SAL2, ATSAL2 | Inositol monophosphatase family protein | chr5:25616638-25618631 FORWARD LENGTH=1223	3.2526	3.27886	3.43854	3.73958	3.99194	-0.0262525	0.828411	-0.18594	0.136597	-0.48698	0.000690479	-0.739336	7.23917e-06	0.00299222
AT2G33740.1_at	CUTA | Nitrogen regulatory PII-like, alpha/beta | chr2:14269581-14271674 FORWARD LENGTH=828	2.5599	2.13709	2.81388	2.58591	3.29905	0.422804	0.218167	-0.253989	0.453362	-0.0260174	0.938296	-0.739153	0.0385752	0.48575
AT1G11330.1_at	S-locus lectin protein kinase family protein | chr1:3810221-3813607 FORWARD LENGTH=2865	2.28419	2.91115	2.62814	2.36654	3.02286	-0.626961	0.061225	-0.343946	0.288016	-0.0823514	0.796224	-0.738674	0.030207	0.446939
AT1G66800.1_at	NAD(P)-binding Rossmann-fold superfamily protein | chr1:24924813-24926365 FORWARD LENGTH=1128	2.53441	3.06881	2.98849	3.36338	3.26701	-0.5344	0.0157642	-0.454088	0.03614	-0.82897	0.000615829	-0.732605	0.00180423	0.111981
AT2G24550.1_at	unknown protein; BEST Arabidopsis thaliana protein match is: unknown protein (TAIR:AT4G31510.1); Has 219 Blast hits to 219 proteins in 33 species: Archae - 0; Bacteria - 0; Metazoa - 16; Fungi - 2; Plants - 184; Viruses - 0; Other Eukaryotes - 17 (source: NCBI BLink). | chr2:10427856-10429222 REVERSE LENGTH=1113	6.30272	6.42717	6.65221	6.63556	7.03374	-0.124443	0.404784	-0.349485	0.0275562	-0.332839	0.0347794	-0.731018	8.7845e-05	0.0165435
AT4G00670.1_at	Remorin family protein | chr4:278316-279186 REVERSE LENGTH=506	4.26885	4.25388	4.76847	5.04793	4.99792	0.0149653	0.938529	-0.499616	0.0175966	-0.779082	0.000703197	-0.729068	0.00126254	0.0908114
AT4G19690.2_at	IRT1 | iron-regulated transporter 1 | chr4:10707446-10709015 FORWARD LENGTH=1377	7.51779	7.51779	7.19773	8.45508	8.24426	-9.57645e-08	1	0.320055	0.29402	-0.937295	0.00531024	-0.726475	0.0244829	0.409571
AT3G02550.1_at	LBD41 | LOB domain-containing protein 41 | chr3:536505-537998 REVERSE LENGTH=1382	5.31796	5.68756	5.84554	6.05524	6.04375	-0.369599	0.0159023	-0.52758	0.00130505	-0.737285	4.66662e-05	-0.725791	5.57528e-05	0.0125847
AT5G61590.1_at	Integrase-type DNA-binding superfamily protein | chr5:24764438-24765324 REVERSE LENGTH=887	6.11075	6.22428	6.59551	6.71689	6.83478	-0.113538	0.598393	-0.48476	0.0342482	-0.606147	0.0102776	-0.724038	0.00302281	0.151269
AT5G47450.1_at	ATTIP2;3, TIP2;3, DELTA-TIP3 | tonoplast intrinsic protein 2;3 | chr5:19248249-19249504 REVERSE LENGTH=1051	5.58442	6.10229	5.69573	6.22026	6.30636	-0.517868	0.00324795	-0.111309	0.475963	-0.635837	0.00057868	-0.721936	0.00016567	0.0242985
AT3G59880.1_at	unknown protein; FUNCTIONS IN: molecular_function unknown; INVOLVED IN: biological_process unknown; LOCATED IN: plasma membrane; BEST Arabidopsis thaliana protein match is: unknown protein (TAIR:AT2G44010.1); Has 20 Blast hits to 20 proteins in 7 species: Archae - 0; Bacteria - 0; Metazoa - 0; Fungi - 0; Plants - 20; Viruses - 0; Other Eukaryotes - 0 (source: NCBI BLink). | chr3:22120969-22121700…	4.64585	4.67066	4.84761	5.37754	5.36702	-0.0248057	0.89583	-0.201763	0.294273	-0.731687	0.00099336	-0.721164	0.00112695	0.0853986
AT4G22212.1_at	Arabidopsis defensin-like protein | chr4:11753986-11754688 FORWARD LENGTH=582	5.25601	5.44585	5.39338	6.01736	5.97623	-0.189844	0.296732	-0.137377	0.446919	-0.761354	0.00041348	-0.720226	0.000695446	0.0626428
AT5G44572.1_at	unknown protein; FUNCTIONS IN: molecular_function unknown; INVOLVED IN: biological_process unknown; LOCATED IN: endomembrane system; Has 7 Blast hits to 7 proteins in 2 species: Archae - 0; Bacteria - 0; Metazoa - 0; Fungi - 0; Plants - 7; Viruses - 0; Other Eukaryotes - 0 (source: NCBI BLink). | chr5:17968152-17969563 FORWARD LENGTH=537	6.68142	6.51364	6.72576	6.96643	7.40128	0.167778	0.469148	-0.044348	0.847231	-0.285019	0.225024	-0.719869	0.00522057	0.202059
AT2G34540.1_at	unknown protein; Has 19 Blast hits to 19 proteins in 5 species: Archae - 0; Bacteria - 0; Metazoa - 0; Fungi - 0; Plants - 19; Viruses - 0; Other Eukaryotes - 0 (source: NCBI BLink). | chr2:14550657-14552230 FORWARD LENGTH=1216	1.81351	2.19912	2.24094	2.53513	2.53266	-0.385607	0.0387488	-0.427429	0.0236531	-0.721621	0.000564629	-0.719151	0.000582923	0.0562202
AT1G15930.1_at	Ribosomal protein L7Ae/L30e/S12e/Gadd45 family protein | chr1:5471519-5473014 FORWARD LENGTH=891	4.96384	5.61778	5.32672	5.08143	5.68293	-0.653937	0.0608389	-0.362875	0.281909	-0.117582	0.723493	-0.719086	0.0411624	0.497434
AT4G14060.1_at	Polyketide cyclase/dehydrase and lipid transport superfamily protein | chr4:8107337-8108307 FORWARD LENGTH=673	4.46556	4.93916	4.73857	5.13797	5.18449	-0.473593	0.0721399	-0.273008	0.285445	-0.672409	0.0142283	-0.718926	0.00950593	0.270371
AT5G19520.1_at	MSL9, ATMSL9 | mechanosensitive channel of small conductance-like 9 | chr5:6585421-6588936 FORWARD LENGTH=2530	4.61842	4.46454	4.65553	5.23207	5.33688	0.153883	0.364514	-0.0371036	0.825061	-0.613648	0.00158114	-0.718453	0.000383356	0.0417845
AT5G11230.1_at	Nucleotide-sugar transporter family protein | chr5:3580562-3581617 FORWARD LENGTH=1056	4.89825	4.99683	4.71891	5.37636	5.61592	-0.098579	0.630938	0.179332	0.385651	-0.478117	0.0290338	-0.71767	0.00221879	0.126782
AT2G37030.1_at	SAUR-like auxin-responsive protein family chr2:15553732-15554106 FORWARD LENGTH=375	3.84425	3.90245	4.11272	4.48863	4.56007	-0.058205	0.719872	-0.268477	0.110013	-0.644381	0.000765807	-0.715818	0.000282458	0.0345853
AT5G07080.1_at	HXXXD-type acyl-transferase family protein | chr5:2200332-2202110 FORWARD LENGTH=1509	6.08881	6.1364	6.24855	6.79889	6.80446	-0.0475889	0.698363	-0.159741	0.202673	-0.710084	1.39247e-05	-0.715654	1.26539e-05	0.00420146
AT4G28260.1_at	unknown protein; Has 50 Blast hits to 42 proteins in 12 species: Archae - 0; Bacteria - 0; Metazoa - 1; Fungi - 0; Plants - 49; Viruses - 0; Other Eukaryotes - 0 (source: NCBI BLink). | chr4:14004485-14006970 FORWARD LENGTH=2322	7.56432	7.81576	7.97677	8.20213	8.27735	-0.251439	0.134202	-0.412443	0.019109	-0.637808	0.000868518	-0.713024	0.000304843	0.0364739
AT1G30420.1_at	ATMRP12, MRP12, ABCC11 | multidrug resistance-associated protein 12 | chr1:10748816-10756316 FORWARD LENGTH=4488	3.88662	4.36567	4.15588	4.21104	4.59631	-0.479047	0.0925992	-0.269261	0.331478	-0.324416	0.244717	-0.709686	0.0168925	0.349797
AT3G23175.1_at	HR-like lesion-inducing protein-related | chr3:8274000-8275470 REVERSE LENGTH=942	5.848	6.10122	6.05654	6.48341	6.55708	-0.25322	0.0407679	-0.208537	0.0862508	-0.635411	2.89652e-05	-0.70908	7.62658e-06	0.0031077
AT1G20930.1_at	CDKB2;2 | cyclin-dependent kinase B2;2 | chr1:7292568-7294746 REVERSE LENGTH=1214	3.49971	3.76954	3.84034	3.82726	4.20705	-0.269835	0.183245	-0.340635	0.0975752	-0.327548	0.110155	-0.707345	0.0019001	0.115851
AT4G33310.1_at	unknown protein; Has 5 Blast hits to 5 proteins in 1 species: Archae - 0; Bacteria - 0; Metazoa - 0; Fungi - 0; Plants - 5; Viruses - 0; Other Eukaryotes - 0 (source: NCBI BLink). | chr4:16056156-16056416 FORWARD LENGTH=261	3.84481	4.09063	4.38892	4.24187	4.55004	-0.24582	0.303001	-0.544109	0.0304715	-0.397064	0.10384	-0.705232	0.0069614	0.231694
AT5G61290.1_at	Flavin-binding monooxygenase family protein | chr5:24648558-24650815 FORWARD LENGTH=1595	4.68649	5.03534	4.93556	5.43617	5.39145	-0.348847	0.0523865	-0.249065	0.155501	-0.749673	0.000294944	-0.704957	0.000533584	0.052577
AT2G29220.1_at	Concanavalin A-like lectin protein kinase family protein | chr2:12562781-12564664 REVERSE LENGTH=1884	3.46092	3.85364	3.82808	4.43314	4.16518	-0.39272	0.0706122	-0.367165	0.0892023	-0.972219	0.000153921	-0.704265	0.00285767	0.146177
AT3G04720.1_at	PR4, HEL, PR-4 | pathogenesis-related 4 | chr3:1285524-1286562 REVERSE LENGTH=837	8.55183	9.13212	8.6146	8.95372	9.25158	-0.580291	0.00130968	-0.0627681	0.686397	-0.40189	0.0169963	-0.699754	0.000229208	0.0300207
AT2G40935.2_at	PLAC8 family protein | chr2:17082848-17084339 FORWARD LENGTH=854	3.96956	3.97149	4.3425	4.18071	4.66812	-0.00193111	0.993593	-0.372939	0.133103	-0.211156	0.384963	-0.698568	0.00858293	0.257276
AT3G27884.1_at	other RNA | chr3:10346155-10348282 REVERSE LENGTH=738	4.94159	5.16587	4.92013	5.44741	5.63947	-0.22428	0.170297	0.0214596	0.892839	-0.505814	0.00469703	-0.697878	0.000306628	0.0364739
AT2G22620.1_at	Rhamnogalacturonate lyase family protein | chr2:9604772-9610595 REVERSE LENGTH=2444	4.85921	4.81113	4.96253	5.24809	5.55683	0.0480775	0.874581	-0.103322	0.734771	-0.388881	0.21156	-0.697625	0.031964	0.455114
AT5G59090.3_at	ATSBT4.12, SBT4.12 | subtilase 4.12 | chr5:23851905-23855275 REVERSE LENGTH=2465	7.43346	7.50323	7.52143	8.2532	8.13101	-0.0697716	0.710065	-0.087965	0.639658	-0.819735	0.00031058	-0.697547	0.00136185	0.0948736
AT2G17080.1_at	Arabidopsis protein of unknown function (DUF241) | chr2:7433326-7434117 REVERSE LENGTH=792	3.82807	3.79137	4.20189	4.31439	4.5252	0.036699	0.886892	-0.373817	0.158826	-0.486327	0.0718132	-0.697129	0.0133593	0.314757
AT4G25434.2_at	ATNUDT10, NUDT10 | nudix hydrolase homolog 10 | chr4:13003976-13005863 REVERSE LENGTH=1074	4.74938	4.92157	5.08337	5.48175	5.44623	-0.172189	0.31984	-0.333996	0.0625693	-0.732378	0.000376818	-0.696851	0.000603524	0.05751
AT2G36180.1_at	EF hand calcium-binding protein family | chr2:15173782-15174216 REVERSE LENGTH=435	3.18363	3.55337	3.36811	3.25165	3.88002	-0.369741	0.111364	-0.184485	0.414595	-0.0680261	0.761684	-0.696396	0.00546123	0.206776
AT2G16720.1_at	MYB7, ATMYB7, ATY49 | myb domain protein 7 | chr2:7255529-7256580 REVERSE LENGTH=980	4.81346	5.04596	4.86417	5.0905	5.50929	-0.232502	0.0448906	-0.050711	0.644093	-0.277041	0.0193044	-0.695838	4.3343e-06	0.00205892
AT4G37700.1_at	unknown protein; Has 64 Blast hits to 64 proteins in 11 species: Archae - 0; Bacteria - 0; Metazoa - 0; Fungi - 0; Plants - 64; Viruses - 0; Other Eukaryotes - 0 (source: NCBI BLink). | chr4:17710272-17710873 REVERSE LENGTH=602	3.93373	4.18695	3.98893	4.37715	4.62316	-0.253221	0.122557	-0.0552027	0.728121	-0.443415	0.0108778	-0.68943	0.000330401	0.0379627
AT1G29620.1_at	Cytochrome C oxidase polypeptide VIB family protein | chr1:10347363-10349017 FORWARD LENGTH=441	3.16748	3.60424	3.51318	3.43742	3.85581	-0.436761	0.105255	-0.345706	0.19378	-0.269938	0.305857	-0.688334	0.0149727	0.330356
AT5G62240.1_at	Cell cycle regulated microtubule associated protein | chr5:25002358-25004766 REVERSE LENGTH=1514	3.58151	3.47394	3.81272	3.95275	4.26909	0.107571	0.547861	-0.231212	0.204426	-0.371242	0.0486256	-0.687574	0.000998104	0.0790854
AT1G79630.1_at	Protein phosphatase 2C family protein | chr1:29962730-29965460 REVERSE LENGTH=2007	5.55282	5.47496	5.42017	5.63562	6.24035	0.0778617	0.751398	0.132653	0.590378	-0.0827953	0.736262	-0.687534	0.0107767	0.288918
AT2G17295.1_at	snoRNA | chr2:7520942-7521021 FORWARD LENGTH=80	9.28141	9.06269	9.16531	9.68276	9.96807	0.218726	0.125025	0.116103	0.404428	-0.401345	0.00847975	-0.686655	8.08877e-05	0.0157939
AT1G13750.1_at	Purple acid phosphatases superfamily protein | chr1:4715394-4718235 REVERSE LENGTH=2082	5.36	5.20185	5.3557	6.22637	6.04638	0.158147	0.255159	0.00429854	0.974871	-0.866373	4.41757e-06	-0.686377	7.23899e-05	0.0147689
AT5G05460.1_at	Glycosyl hydrolase family 85 chr5:1615529-1618902 FORWARD LENGTH=2260	4.77396	4.79653	4.94857	5.24633	5.45964	-0.0225766	0.896415	-0.174614	0.320588	-0.472375	0.0127372	-0.685682	0.000805954	0.0678601
AT4G17150.1_at	alpha/beta-Hydrolases superfamily protein | chr4:9638174-9641756 FORWARD LENGTH=2034	4.69085	4.91937	5.12003	5.05021	5.37528	-0.228523	0.37325	-0.429184	0.103425	-0.359356	0.168109	-0.684428	0.0135329	0.316913
AT5G07580.1_at	Integrase-type DNA-binding superfamily protein | chr5:2399504-2400601 FORWARD LENGTH=1098	5.33485	5.49466	5.66426	5.85938	6.01733	-0.159813	0.603433	-0.32941	0.290074	-0.524525	0.0996203	-0.682475	0.0364824	0.475481
AT5G20150.1_at	ATSPX1, SPX1 | SPX domain gene 1 | chr5:6802372-6803625 FORWARD LENGTH=1086	6.12673	5.73303	5.94483	6.84706	6.80738	0.393699	0.0644836	0.181891	0.3751	-0.720336	0.00201297	-0.680658	0.00313315	0.155229
AT5G63850.1_at	AAP4 | amino acid permease 4 | chr5:25551055-25553520 FORWARD LENGTH=1847	6.011	6.4614	6.19476	6.95439	6.68847	-0.450401	0.0301877	-0.18376	0.350059	-0.943395	0.000106044	-0.677473	0.00232657	0.130826
AT1G63600.1_at	Receptor-like protein kinase-related family protein | chr1:23581712-23582624 FORWARD LENGTH=913	4.48611	4.74902	4.28378	4.95931	5.16349	-0.262908	0.263845	0.202333	0.386486	-0.473194	0.0524158	-0.677381	0.00812003	0.25018
AT4G26010.1_at	Peroxidase superfamily protein | chr4:13200593-13201941 FORWARD LENGTH=1246	6.81968	7.2037	6.90802	7.51096	7.49699	-0.384019	0.0116066	-0.0883467	0.526687	-0.691282	8.05033e-05	-0.677315	0.000100547	0.0181825
AT2G28250.2_at	NCRK | Protein kinase superfamily protein | chr2:12043482-12046537 FORWARD LENGTH=2007	5.23453	5.28962	5.26836	5.73833	5.91136	-0.0550953	0.797741	-0.0338337	0.874878	-0.503807	0.0285551	-0.676837	0.00496613	0.197079
AT1G02660.1_at	alpha/beta-Hydrolases superfamily protein | chr1:571955-574981 REVERSE LENGTH=2609	5.26149	5.42043	5.76344	5.80289	5.93815	-0.158947	0.531053	-0.50195	0.0587333	-0.541403	0.043036	-0.676666	0.013988	0.321862
AT5G03435.1_at	Ca2+dependent plant phosphoribosyltransferase family protein | chr5:853365-855693 REVERSE LENGTH=2238	3.05273	3.49794	3.13098	3.48397	3.72911	-0.445206	0.0797321	-0.0782471	0.748007	-0.431234	0.0888405	-0.676375	0.0112637	0.292406
AT2G37130.2_at	Peroxidase superfamily protein | chr2:15598055-15599800 REVERSE LENGTH=1127	9.57214	9.91317	9.85359	10.1325	10.2484	-0.341035	0.0708237	-0.281447	0.130512	-0.560317	0.00544923	-0.67625	0.00127504	0.0909884
AT5G35940.1_at	Mannose-binding lectin superfamily protein | chr5:14090825-14092977 FORWARD LENGTH=1504	4.2816	4.34366	4.27598	4.84637	4.95568	-0.0620594	0.741066	0.00561786	0.9761	-0.564772	0.00677542	-0.674078	0.00182625	0.112862
AT1G47600.2_at	BGLU34 | beta glucosidase 34 | chr1:17491732-17494754 FORWARD LENGTH=1737	5.49745	5.82901	5.73491	6.06255	6.17037	-0.331556	0.0961046	-0.237456	0.224721	-0.565105	0.00776769	-0.672922	0.00219778	0.125916
AT2G23600.1_at	ACL, ATMES2, MES2, ATME8, ME8 | acetone-cyanohydrin lyase | chr2:10042199-10043673 REVERSE LENGTH=950	3.52935	3.71087	4.0579	4.42547	4.20202	-0.18152	0.166912	-0.528558	0.000535636	-0.896127	1.18472e-06	-0.672679	4.35072e-05	0.0104287
AT2G28160.1_at	FIT1, ATBHLH029, FRU, BHLH029, ATBHLH29, ATFIT1 | FER-like regulator of iron uptake | chr2:12004708-12006122 FORWARD LENGTH=1176	6.0845	6.35984	6.2759	6.88656	6.75687	-0.275342	0.0988691	-0.191401	0.242122	-0.802061	7.77601e-05	-0.672377	0.000473842	0.0480286
AT2G47130.1_at	NAD(P)-binding Rossmann-fold superfamily protein | chr2:19349536-19350539 REVERSE LENGTH=923	7.26912	7.51259	7.37657	7.73177	7.93714	-0.243476	0.24451	-0.107457	0.601978	-0.462656	0.0344927	-0.668022	0.00393634	0.175711
AT4G26260.2_at	MIOX4 | myo-inositol oxygenase 4 | chr4:13297803-13300319 FORWARD LENGTH=1266	3.25694	3.4785	3.45999	3.66284	3.92413	-0.221567	0.325955	-0.203056	0.366975	-0.405905	0.0807013	-0.667192	0.00697902	0.231859
AT1G73280.1_at	scpl3 | serine carboxypeptidase-like 3 | chr1:27552970-27555322 REVERSE LENGTH=1326	4.87378	4.86272	4.87421	5.52086	5.53964	0.011059	0.955187	-0.000428053	0.998264	-0.647082	0.0036516	-0.665857	0.002945	0.148308
AT4G37070.2_at	PLP1, PLA IVA, AtPLAIVA | Acyl transferase/acyl hydrolase/lysophospholipase superfamily protein | chr4:17464785-17467109 REVERSE LENGTH=1427	5.30936	5.04361	5.51311	5.52117	5.97452	0.265744	0.369176	-0.203752	0.489109	-0.211815	0.472316	-0.665163	0.0331525	0.460381
AT3G20860.1_at	ATNEK5, NEK5 | NIMA-related kinase 5 | chr3:7306147-7308434 FORWARD LENGTH=1284	6.62806	6.70041	6.63642	7.06058	7.29157	-0.0723519	0.643304	-0.00835472	0.957227	-0.43252	0.0113729	-0.663508	0.000404234	0.0430747
AT3G14810.1_at	MSL5 | mechanosensitive channel of small conductance-like 5 | chr3:4971223-4974354 REVERSE LENGTH=2784	6.25814	6.71392	6.85022	7.1291	6.92108	-0.455782	0.143211	-0.59208	0.0621206	-0.870965	0.00899196	-0.662942	0.0389232	0.487538
AT5G24470.1_at	APRR5, PRR5 | pseudo-response regulator 5 | chr5:8355951-8358873 REVERSE LENGTH=2257	8.67752	8.58985	8.76019	9.41823	9.34016	0.0876726	0.771634	-0.0826704	0.784304	-0.740707	0.0227031	-0.662639	0.0388276	0.487097
AT5G64110.1_at	Peroxidase superfamily protein | chr5:25654074-25656030 REVERSE LENGTH=1397	5.45071	5.35189	5.44298	5.76231	6.11279	0.0988238	0.465365	0.00772593	0.954146	-0.311603	0.0301604	-0.662078	9.06447e-05	0.0169545
AT4G11210.1_at	Disease resistance-responsive (dirigent-like protein) family protein | chr4:6832691-6833245 FORWARD LENGTH=555	4.74048	4.63711	4.69753	5.3822	5.40121	0.103372	0.666542	0.042943	0.85763	-0.641726	0.0139725	-0.66073	0.0117582	0.296005
AT1G10550.1_at	XTH33, XET | xyloglucan:xyloglucosyl transferase 33 | chr1:3479153-3480988 REVERSE LENGTH=1068	3.35733	3.66105	3.60826	3.64781	4.01769	-0.303714	0.179008	-0.25093	0.263116	-0.290474	0.197769	-0.66036	0.0069936	0.232101
AT3G01260.1_at	Galactose mutarotase-like superfamily protein | chr3:80176-82005 REVERSE LENGTH=1349	3.72537	4.02626	4.01546	4.64431	4.38502	-0.300888	0.0944608	-0.290089	0.105972	-0.918934	3.88628e-05	-0.659645	0.00110739	0.0843182
AT4G11460.1_at	CRK30 | cysteine-rich RLK (RECEPTOR-like protein kinase) 30 | chr4:6964468-6967093 FORWARD LENGTH=2103	4.18717	4.09389	4.39129	4.69121	4.84626	0.0932821	0.688369	-0.204117	0.38416	-0.504036	0.0407849	-0.659092	0.00989667	0.276299
AT1G57560.1_at	AtMYB50, MYB50 | myb domain protein 50 | chr1:21316828-21318064 FORWARD LENGTH=1073	3.93714	3.85493	3.87512	4.72133	4.5928	0.082213	0.58462	0.062019	0.679519	-0.784185	4.60948e-05	-0.655659	0.000309459	0.0364783
AT2G46940.1_at	unknown protein; BEST Arabidopsis thaliana protein match is: unknown protein (TAIR:AT3G62070.1); Has 143 Blast hits to 141 proteins in 14 species: Archae - 0; Bacteria - 0; Metazoa - 4; Fungi - 0; Plants - 139; Viruses - 0; Other Eukaryotes - 0 (source: NCBI BLink). | chr2:19286658-19287581 REVERSE LENGTH=835	3.93787	4.25937	4.05876	4.48869	4.59229	-0.321504	0.0234523	-0.120896	0.364515	-0.550823	0.00048426	-0.654422	8.33509e-05	0.0159404
AT5G44480.1_at	DUR | NAD(P)-binding Rossmann-fold superfamily protein | chr5:17921515-17923643 FORWARD LENGTH=1311	7.27193	7.6264	7.2315	7.72651	7.92634	-0.354471	0.0275535	0.0404317	0.787758	-0.454575	0.00650754	-0.654407	0.000320827	0.0372663
AT3G25240.1_at	Protein of unknown function (DUF506) chr3:9192540-9193385 FORWARD LENGTH=846	3.94011	3.96427	4.08027	4.81977	4.59355	-0.0241594	0.87864	-0.140161	0.380708	-0.879662	2.28451e-05	-0.65344	0.000540414	0.0530856
AT3G04210.1_at	Disease resistance protein (TIR-NBS class) | chr3:1105963-1108069 REVERSE LENGTH=1940	5.61645	5.77301	5.8951	6.25414	6.26963	-0.156566	0.230899	-0.278656	0.0404584	-0.637696	8.08386e-05	-0.653185	6.19684e-05	0.0136019
AT1G75190.1_at	unknown protein; Has 7306 Blast hits to 3858 proteins in 279 species: Archae - 15; Bacteria - 134; Metazoa - 3314; Fungi - 546; Plants - 228; Viruses - 207; Other Eukaryotes - 2862 (source: NCBI BLink). | chr1:28219382-28220227 FORWARD LENGTH=846	7.1232	7.44511	7.50537	7.5076	7.77605	-0.321907	0.0128349	-0.382167	0.00415673	-0.3844	0.00398422	-0.652847	2.50403e-05	0.00705273
AT1G51850.1_at	Leucine-rich repeat protein kinase family protein | chr1:19252847-19256783 REVERSE LENGTH=2715	5.74382	6.10606	5.72339	6.29252	6.39539	-0.362235	0.042983	0.0204277	0.903692	-0.548699	0.00397204	-0.651569	0.000999534	0.0790854
AT4G30170.1_at	Peroxidase family protein | chr4:14762841-14764627 FORWARD LENGTH=1204	7.23219	7.48291	7.27751	7.88317	7.8834	-0.250717	0.0990281	-0.0453215	0.75691	-0.650986	0.00026185	-0.65121	0.000260949	0.032827
AT5G18636.1_at	unknown protein; BEST Arabidopsis thaliana protein match is: unknown protein (TAIR:AT5G25200.1); Has 35333 Blast hits to 34131 proteins in 2444 species: Archae - 798; Bacteria - 22429; Metazoa - 974; Fungi - 991; Plants - 531; Viruses - 0; Other Eukaryotes - 9610 (source: NCBI BLink). | chr5:6211268-6212371 FORWARD LENGTH=1104	2.63192	2.6325	2.67826	2.88153	3.28062	-0.000581599	0.997918	-0.0463442	0.835378	-0.249618	0.270913	-0.6487	0.00847733	0.254776
AT4G20380.7_at	LSD1 | LSD1 zinc finger family protein | chr4:11004547-11006788 FORWARD LENGTH=1265	5.58514	6.07174	5.79077	6.13538	6.2332	-0.486597	0.105066	-0.205627	0.480188	-0.550243	0.0694944	-0.648059	0.0354584	0.471184
AT1G08440.1_at	Aluminium activated malate transporter family protein | chr1:2663027-2665343 FORWARD LENGTH=1506	2.32162	2.59318	2.65717	2.44575	2.96853	-0.271555	0.155886	-0.33555	0.0838014	-0.124123	0.507149	-0.646909	0.00237682	0.132917
AT3G14280.1_at	unknown protein; Has 51 Blast hits to 51 proteins in 13 species: Archae - 0; Bacteria - 0; Metazoa - 0; Fungi - 0; Plants - 51; Viruses - 0; Other Eukaryotes - 0 (source: NCBI BLink). | chr3:4761432-4762395 REVERSE LENGTH=757	5.24012	5.23333	5.28466	5.5075	5.88657	0.00678465	0.957829	-0.0445436	0.728895	-0.267378	0.0486836	-0.646452	7.10146e-05	0.0145818
AT1G17190.1_at	ATGSTU26, GSTU26 | glutathione S-transferase tau 26 | chr1:5875350-5876545 FORWARD LENGTH=935	5.85978	6.20643	6.17379	6.55893	6.50539	-0.34665	0.00614781	-0.314006	0.0115957	-0.69915	6.46764e-06	-0.645604	1.73517e-05	0.00535561
AT2G28630.1_at	KCS12 | 3-ketoacyl-CoA synthase 12 | chr2:12275319-12277245 REVERSE LENGTH=1927	5.32097	5.28975	5.86636	5.66461	5.96561	0.0312267	0.913496	-0.545383	0.0701601	-0.343634	0.240957	-0.64464	0.0352996	0.471184
AT5G23720.2_at	PHS1 | dual specificity protein phosphatase family protein | chr5:7998281-8002805 FORWARD LENGTH=3024	3.85375	4.32909	4.41714	3.81334	4.49767	-0.475331	0.118216	-0.56339	0.0675718	0.040418	0.89064	-0.643916	0.0392389	0.488598
AT5G01015.1_at	unknown protein; FUNCTIONS IN: molecular_function unknown; INVOLVED IN: biological_process unknown; LOCATED IN: endomembrane system; EXPRESSED IN: 23 plant structures; EXPRESSED DURING: 13 growth stages; BEST Arabidopsis thaliana protein match is: unknown protein (TAIR:AT1G65295.1); Has 30201 Blast hits to 17322 proteins in 780 species: Archae - 12; Bacteria - 1396; Metazoa - 17338; Fungi - 3422;…	6.52766	6.57641	6.76537	7.10952	7.17079	-0.04875	0.813117	-0.237715	0.257241	-0.581865	0.0102571	-0.643136	0.0053096	0.203776
AT1G70710.1_at	ATGH9B1, CEL1, GH9B1 | glycosyl hydrolase 9B1 | chr1:26659132-26663010 REVERSE LENGTH=1751	6.08106	6.51451	6.20367	6.52124	6.72236	-0.433459	0.0150648	-0.12261	0.457492	-0.44018	0.0137858	-0.641302	0.000879729	0.0722986
AT1G23140.1_at	Calcium-dependent lipid-binding (CaLB domain) family protein | chr1:8202261-8203215 REVERSE LENGTH=642	5.22013	5.3533	5.16405	5.78826	5.86106	-0.133166	0.501075	0.0560879	0.775751	-0.568121	0.00889621	-0.640921	0.00390058	0.174895
AT1G61820.3_at	BGLU46 | beta glucosidase 46 | chr1:22836378-22838615 FORWARD LENGTH=1634	5.12774	5.36501	5.29305	5.55081	5.76809	-0.23727	0.277439	-0.165309	0.445392	-0.42307	0.061075	-0.640357	0.00726361	0.23735
AT5G44380.1_at	FAD-binding Berberine family protein | chr5:17878722-17881440 REVERSE LENGTH=1848	7.08813	7.41865	7.41528	7.62685	7.728	-0.330521	0.0692307	-0.327154	0.0718616	-0.538727	0.00551584	-0.639871	0.00148131	0.0994634
AT5G07390.2_at	RBOHA | respiratory burst oxidase homolog A | chr5:2336184-2339868 REVERSE LENGTH=2714	4.89894	5.01874	5.08346	5.35686	5.53845	-0.119808	0.491621	-0.184529	0.293783	-0.45792	0.0150968	-0.639518	0.00145279	0.0981701
AT3G27860.1_at	Tudor/PWWP/MBT superfamily protein | chr3:10326128-10328086 FORWARD LENGTH=1959	3.08434	3.45124	3.30525	3.42243	3.72142	-0.366893	0.0631801	-0.22091	0.248797	-0.338085	0.0847146	-0.637073	0.00290926	0.147207
AT3G54580.1_at	Proline-rich extensin-like family protein | chr3:20200688-20203782 REVERSE LENGTH=3095	4.65676	5.05001	4.54612	5.60902	5.29342	-0.393246	0.164644	0.110649	0.688462	-0.952257	0.00248706	-0.636652	0.0306061	0.449514
AT5G41080.2_at	PLC-like phosphodiesterases superfamily protein | chr5:16441808-16443985 FORWARD LENGTH=1408	6.61529	6.42082	7.04953	6.94514	7.25077	0.194462	0.283307	-0.434244	0.0236736	-0.329853	0.0768823	-0.635486	0.00195941	0.117443
AT3G14850.2_at	TBL41 | TRICHOME BIREFRINGENCE-LIKE 41 | chr3:4995597-4997693 FORWARD LENGTH=1171	4.33534	4.47316	4.48801	5.05924	4.96704	-0.137822	0.327404	-0.152671	0.279413	-0.7239	4.83622e-05	-0.631705	0.000210189	0.0281079
AT4G22460.1_at	Bifunctional inhibitor/lipid-transfer protein/seed storage 2S albumin superfamily protein | chr4:11839160-11839561 REVERSE LENGTH=402	4.29451	4.43918	4.67397	4.95311	4.92614	-0.144669	0.435001	-0.379464	0.0505287	-0.6586	0.00186874	-0.631631	0.00260553	0.139606
AT4G39070.1_at	B-box zinc finger family protein | chr4:18204855-18206509 REVERSE LENGTH=1023	5.79629	5.59697	6.04162	6.26001	6.42787	0.199326	0.0543159	-0.245329	0.0207685	-0.463712	0.000143783	-0.631574	3.75881e-06	0.00189892
AT1G14780.1_at	MAC/Perforin domain-containing protein | chr1:5090990-5094152 FORWARD LENGTH=2193	5.97225	6.10532	6.18409	6.63888	6.60339	-0.133072	0.222717	-0.211847	0.0595099	-0.666635	5.53779e-06	-0.631142	1.10193e-05	0.00381207
AT1G01020.1_at	ARV1 | Arv1-like protein | chr1:5928-8737 REVERSE LENGTH=1623	3.54684	4.0222	3.67324	3.94569	4.17701	-0.475362	0.023605	-0.126403	0.519496	-0.398853	0.0526736	-0.630172	0.00416151	0.182033
AT1G13300.1_at	HRS1 | myb-like transcription factor family protein | chr1:4556892-4558708 FORWARD LENGTH=1237	5.35817	5.49128	5.44836	5.85015	5.98775	-0.13311	0.241146	-0.0901952	0.422269	-0.491985	0.000283267	-0.629581	1.88113e-05	0.00564818
AT3G09270.1_at	ATGSTU8, GSTU8 | glutathione S-transferase TAU 8 | chr3:2848289-2849289 REVERSE LENGTH=856	7.35574	7.47628	7.39172	7.80969	7.985	-0.120541	0.526233	-0.0359749	0.849214	-0.453951	0.0254736	-0.629261	0.00334419	0.161587
AT5G44585.1_at	unknown protein; FUNCTIONS IN: molecular_function unknown; INVOLVED IN: biological_process unknown; LOCATED IN: endomembrane system; Has 30201 Blast hits to 17322 proteins in 780 species: Archae - 12; Bacteria - 1396; Metazoa - 17338; Fungi - 3422; Plants - 5037; Viruses - 0; Other Eukaryotes - 2996 (source: NCBI BLink). | chr5:17984616-17985473 FORWARD LENGTH=410	5.76569	5.82483	6.13811	6.14847	6.39355	-0.0591473	0.795402	-0.372421	0.114686	-0.382783	0.105593	-0.627865	0.0119191	0.297492
AT2G29440.1_at	ATGSTU6, GST24, GSTU6 | glutathione S-transferase tau 6 | chr2:12620060-12621148 REVERSE LENGTH=820	2.18705	2.48465	2.17134	2.44956	2.81482	-0.297601	0.179704	0.0157059	0.942101	-0.262509	0.234061	-0.627774	0.00861489	0.257452
AT4G13620.1_at	Integrase-type DNA-binding superfamily protein | chr4:7932138-7933542 FORWARD LENGTH=1405	4.65955	4.8987	4.75346	5.13262	5.28516	-0.239148	0.109112	-0.0939128	0.516528	-0.473067	0.00366011	-0.625609	0.000331758	0.0379815
AT2G45070.2_at	SEC61 BETA | Preprotein translocase Sec, Sec61-beta subunit protein | chr2:18587017-18588141 REVERSE LENGTH=565	4.76427	4.852	5.0577	4.76334	5.38726	-0.0877251	0.759122	-0.29343	0.311412	0.000932233	0.997397	-0.622988	0.0400928	0.492121
AT2G38310.1_at	PYL4, RCAR10 | PYR1-like 4 | chr2:16050063-16051168 FORWARD LENGTH=1106	8.94029	8.64891	9.04782	9.60965	9.56297	0.291376	0.0469678	-0.107531	0.441729	-0.669362	0.000112891	-0.622681	0.000239461	0.030981
AT5G39020.1_at	Malectin/receptor-like protein kinase family protein | chr5:15616917-15619358 FORWARD LENGTH=2442	5.54263	5.38909	5.83649	5.93674	6.16414	0.153537	0.419692	-0.293864	0.131265	-0.394111	0.0480605	-0.621506	0.003583	0.167947
AT5G19800.1_at	hydroxyproline-rich glycoprotein family protein | chr5:6690648-6690938 FORWARD LENGTH=291	4.48732	4.75183	4.40006	5.00562	5.10652	-0.264511	0.343032	0.0872587	0.751743	-0.518303	0.0723342	-0.619195	0.0349367	0.47016
AT2G43680.2_at	IQD14 | IQ-domain 14 | chr2:18108349-18111827 FORWARD LENGTH=2588	5.185	5.3348	5.29268	5.46112	5.8033	-0.149796	0.529981	-0.107682	0.650784	-0.27612	0.253116	-0.618302	0.0164342	0.343886
AT1G69230.2_at	SP1L2 | SPIRAL1-like2 | chr1:26026312-26027708 REVERSE LENGTH=652	2.55855	2.87762	2.66679	2.68913	3.17628	-0.319076	0.160093	-0.108245	0.625244	-0.130583	0.556305	-0.617731	0.0108848	0.289125
AT5G44580.1_at	unknown protein; FUNCTIONS IN: molecular_function unknown; INVOLVED IN: biological_process unknown; LOCATED IN: endomembrane system; EXPRESSED IN: 18 plant structures; EXPRESSED DURING: 12 growth stages; BEST Arabidopsis thaliana protein match is: unknown protein (TAIR:AT5G44582.1); Has 30201 Blast hits to 17322 proteins in 780 species: Archae - 12; Bacteria - 1396; Metazoa - 17338; Fungi - 3422;…	8.10737	8.59068	8.25644	8.70254	8.72502	-0.483313	0.0362744	-0.149068	0.494497	-0.595168	0.0121699	-0.617646	0.00970105	0.273235
AT5G19190.1_at	unknown protein; BEST Arabidopsis thaliana protein match is: unknown protein (TAIR:AT3G06070.1); Has 1807 Blast hits to 1807 proteins in 277 species: Archae - 0; Bacteria - 0; Metazoa - 736; Fungi - 347; Plants - 385; Viruses - 0; Other Eukaryotes - 339 (source: NCBI BLink). | chr5:6457260-6458031 FORWARD LENGTH=667	6.36162	6.32317	6.42016	6.98596	6.97831	0.0384491	0.856822	-0.0585411	0.783672	-0.624338	0.00810297	-0.616696	0.00877046	0.260627
AT1G75000.1_at	GNS1/SUR4 membrane protein family | chr1:28163650-28164586 FORWARD LENGTH=846	5.89711	5.9009	6.08619	6.49204	6.51375	-0.00379065	0.983926	-0.189087	0.321601	-0.59493	0.0048462	-0.616647	0.00374021	0.171774
AT1G72060.1_at	serine-type endopeptidase inhibitors | chr1:27118447-27119011 FORWARD LENGTH=461	4.62501	4.23636	4.77762	5.15373	5.23861	0.388649	0.0893941	-0.152605	0.490017	-0.528718	0.0250819	-0.613602	0.010946	0.289741
AT3G47480.1_at	Calcium-binding EF-hand family protein | chr3:17496354-17496947 REVERSE LENGTH=594	2.28209	2.29763	2.3978	2.61494	2.89366	-0.0155329	0.928475	-0.115707	0.50631	-0.332846	0.0667079	-0.611566	0.00209282	0.122217
AT1G50520.1_at	CYP705A27 | cytochrome P450, family 705, subfamily A, polypeptide 27 | chr1:18719378-18721219 FORWARD LENGTH=1754	2.33904	2.45188	2.6498	2.54902	2.95021	-0.112842	0.560733	-0.310762	0.119853	-0.209983	0.284496	-0.61117	0.00480499	0.19396
AT1G56010.2_at	NAC1, ANAC022 | NAC domain containing protein 1 | chr1:20946571-20949281 REVERSE LENGTH=1393	3.26822	3.38231	3.44196	3.55292	3.87882	-0.114083	0.473929	-0.173738	0.279922	-0.284698	0.0844742	-0.610597	0.000998933	0.0790854
AT3G54260.1_at	TBL36 | TRICHOME BIREFRINGENCE-LIKE 36 | chr3:20085010-20086763 REVERSE LENGTH=1245	6.57746	7.10378	6.78311	7.03307	7.18703	-0.526319	0.00242095	-0.205644	0.185924	-0.455603	0.00689369	-0.609567	0.000696753	0.0626428
AT2G27240.1_at	Aluminium activated malate transporter family protein | chr2:11659579-11662408 FORWARD LENGTH=1521	2.50204	2.65883	2.85013	2.70829	3.11149	-0.156788	0.429249	-0.348086	0.089286	-0.206245	0.301451	-0.609444	0.00557014	0.208272
AT1G72140.1_at	Major facilitator superfamily protein | chr1:27141814-27144490 FORWARD LENGTH=1875	5.88106	6.30514	6.16461	6.57738	6.49011	-0.424072	0.00382302	-0.283548	0.0397308	-0.696321	3.48065e-05	-0.609045	0.000152628	0.0232426
AT1G07610.1_at	MT1C | metallothionein 1C | chr1:2341542-2342123 FORWARD LENGTH=457	8.42396	8.77637	8.30734	8.75978	9.0327	-0.352409	0.0133915	0.116614	0.376602	-0.335818	0.0176134	-0.608737	0.00016193	0.0239449
AT1G55000.1_at	peptidoglycan-binding LysM domain-containing protein | chr1:20514634-20516468 FORWARD LENGTH=1096	5.35347	5.46159	5.87398	5.68918	5.96032	-0.108115	0.67633	-0.520511	0.0558383	-0.335704	0.204036	-0.60685	0.0283506	0.436533
AT3G29375.1_at	XH domain-containing protein | chr3:11280151-11281894 FORWARD LENGTH=1133	2.55779	2.56772	2.84863	2.42095	3.16422	-0.00992402	0.971198	-0.29084	0.297385	0.13684	0.619794	-0.60643	0.038037	0.483468
AT5G38210.1_at	Protein kinase family protein | chr5:15261005-15265630 FORWARD LENGTH=2345	7.30894	7.48071	7.53129	7.7021	7.91244	-0.171768	0.111172	-0.222348	0.0437108	-0.393159	0.00119939	-0.603501	1.37034e-05	0.00445039
AT2G39200.1_at	MLO12, ATMLO12 | Seven transmembrane MLO family protein | chr2:16356148-16359813 REVERSE LENGTH=1854	7.6691	7.45945	7.66054	8.19146	8.27253	0.20965	0.125756	0.00855716	0.94849	-0.52236	0.000826654	-0.603432	0.000207419	0.0279726
AT5G03545.1_at	AT4, ATIPS2 | Expressed in response to phosphate starvation, this response is enhanced by the presence of IAA. | chr5:894706-895400 FORWARD LENGTH=695	5.58546	5.13266	5.40489	6.50374	6.18838	0.452798	0.00703015	0.180565	0.241413	-0.918285	7.76177e-06	-0.602929	0.000747356	0.0645737
AT3G09830.2_at	Protein kinase superfamily protein | chr3:3016538-3018983 FORWARD LENGTH=1846	4.43046	4.94592	4.86356	4.98688	5.03301	-0.515469	0.0655448	-0.433106	0.11683	-0.556426	0.0484522	-0.602559	0.0341282	0.466258
AT1G07135.1_at	glycine-rich protein | chr1:2189928-2190659 REVERSE LENGTH=732	5.62502	5.53174	6.05515	6.04056	6.22727	0.0932759	0.668339	-0.430136	0.0596992	-0.415545	0.0680271	-0.602248	0.0114557	0.293348
AT4G16960.1_at	Disease resistance protein (TIR-NBS-LRR class) family | chr4:9546343-9551007 REVERSE LENGTH=3126	3.84911	3.77163	3.9211	3.96215	4.45115	0.0774757	0.681987	-0.0719927	0.703295	-0.113043	0.550988	-0.602041	0.00453617	0.188558
AT4G08160.2_at	glycosyl hydrolase family 10 protein / carbohydrate-binding domain-containing protein | chr4:5159034-5162774 REVERSE LENGTH=2527	4.95491	5.316	5.22221	5.50925	5.55661	-0.361088	0.0566313	-0.267298	0.149035	-0.554344	0.00579331	-0.601699	0.00320931	0.157385
AT3G13650.1_at	Disease resistance-responsive (dirigent-like protein) family protein | chr3:4462892-4463872 FORWARD LENGTH=981	3.38756	3.57371	3.42259	4.00809	3.9892	-0.186146	0.169262	-0.0350271	0.790694	-0.620528	0.000148121	-0.601638	0.000204035	0.0276333
AT1G74210.1_at	PLC-like phosphodiesterases superfamily protein | chr1:27910314-27912941 FORWARD LENGTH=1417	7.31951	7.45487	7.36333	7.9683	7.92031	-0.135359	0.30304	-0.0438169	0.73545	-0.64879	7.54455e-05	-0.600798	0.000171706	0.0245072
AT2G32100.1_at	ATOFP16, OFP16 | ovate family protein 16 | chr2:13647852-13648785 FORWARD LENGTH=934	6.32424	6.29269	6.57754	6.9817	6.92432	0.0315491	0.885771	-0.253302	0.257217	-0.65746	0.00703961	-0.600078	0.0125025	0.30407
AT1G26800.1_at	RING/U-box superfamily protein | chr1:9285099-9286324 REVERSE LENGTH=1226	3.24384	3.55137	3.60157	3.41393	3.84365	-0.30753	0.139361	-0.357724	0.088767	-0.170084	0.403706	-0.599802	0.00737169	0.239652
AT2G14247.1_at	Expressed protein | chr2:6034348-6034835 FORWARD LENGTH=488	8.48953	8.24728	8.30357	8.48925	9.08928	0.242251	0.0320097	0.185966	0.0913342	0.00028564	0.997845	-0.599751	1.81045e-05	0.00548773
AT5G26260.1_at	TRAF-like family protein | chr5:9200463-9202400 FORWARD LENGTH=1332	8.19241	8.51472	8.22054	8.8718	8.79089	-0.32231	0.0206831	-0.0281313	0.827452	-0.67939	4.3042e-05	-0.598485	0.000171713	0.0245072
AT1G62770.1_at	Plant invertase/pectin methylesterase inhibitor superfamily protein | chr1:23245886-23246890 REVERSE LENGTH=868	3.64616	3.6134	3.81475	4.18175	4.24408	0.0327516	0.808939	-0.168598	0.222546	-0.535592	0.0008017	-0.597922	0.000282837	0.0345853
AT1G56430.1_at	ATNAS4, NAS4 | nicotianamine synthase 4 | chr1:21136944-21138087 FORWARD LENGTH=1144	6.62159	6.35268	6.51123	6.46867	7.21928	0.268915	0.156388	0.110357	0.551534	0.152925	0.411401	-0.597693	0.00405866	0.179161
AT1G06830.1_at	Glutaredoxin family protein | chr1:2097151-2097655 FORWARD LENGTH=505	2.54006	2.82741	2.81982	3.86727	3.13739	-0.287341	0.117214	-0.279754	0.126553	-1.32721	4.72386e-07	-0.597326	0.00302199	0.151269
AT1G61360.2_at	S-locus lectin protein kinase family protein | chr1:22637728-22641825 REVERSE LENGTH=2825	5.15253	5.03185	5.20829	5.39098	5.74785	0.120678	0.531381	-0.0557612	0.771464	-0.238458	0.223303	-0.595323	0.00550922	0.207751
